# Supplementary material
Source: ML conference proceedings conference paper supplement (https://proceedings.neurips.cc/paper_files/paper/2024/hash/90080022263cddafddd4a0726f1fb186-Abstract.html)

distance<sub>p</sub> icked<sub>c</sub> cells (sort 10.0%)

Average Percentage of Boundary Cells

30  
25  
20  
15  
10  
5  
0

random

cal

dal

dcal-0.3

dcal-0.5

dcal-0.7

dcal-0.9

Method

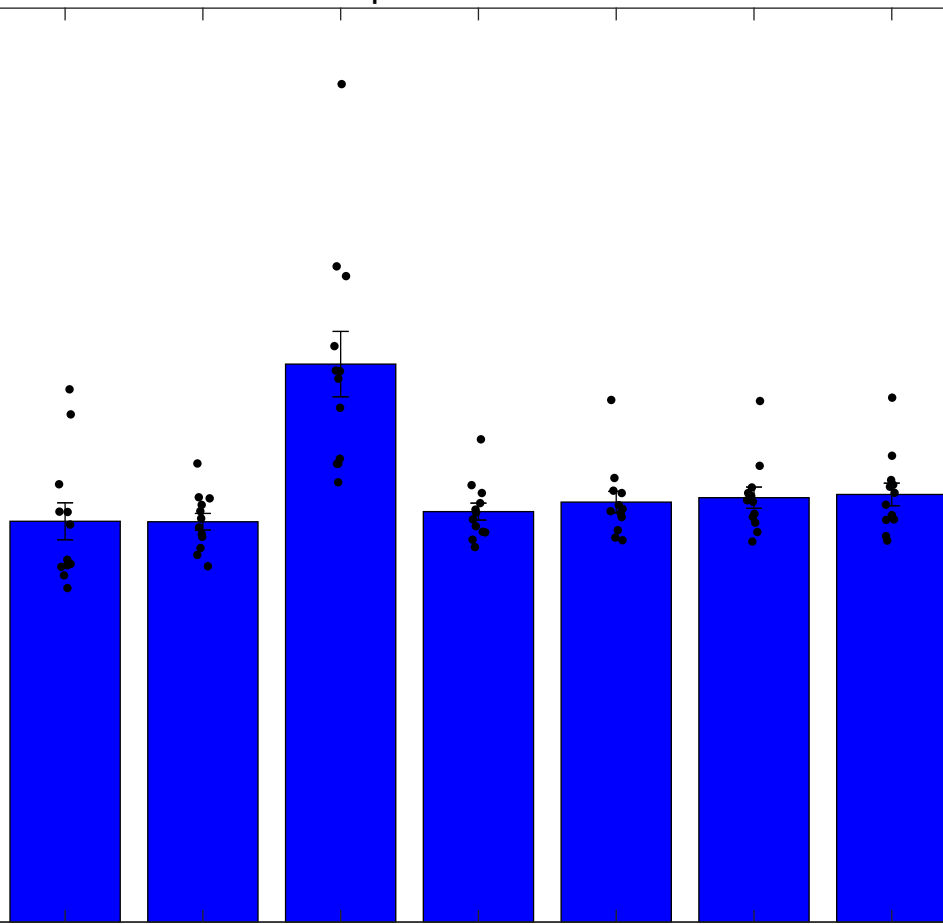

Supplement: Supplementary file 59 [file 90080022263cddafddd4a0726f1fb186-Supplemental-Conference.zip]
