# Supplementary material
Source: ML conference proceedings conference paper supplement (https://proceedings.neurips.cc/paper_files/paper/2024/hash/90080022263cddafddd4a0726f1fb186-Abstract.html)

percent<sub>b</sub> boundary<sub>c</sub> cells<sub>p</sub> icked (sort 10.0%)

Average Percentage of Boundary Cells

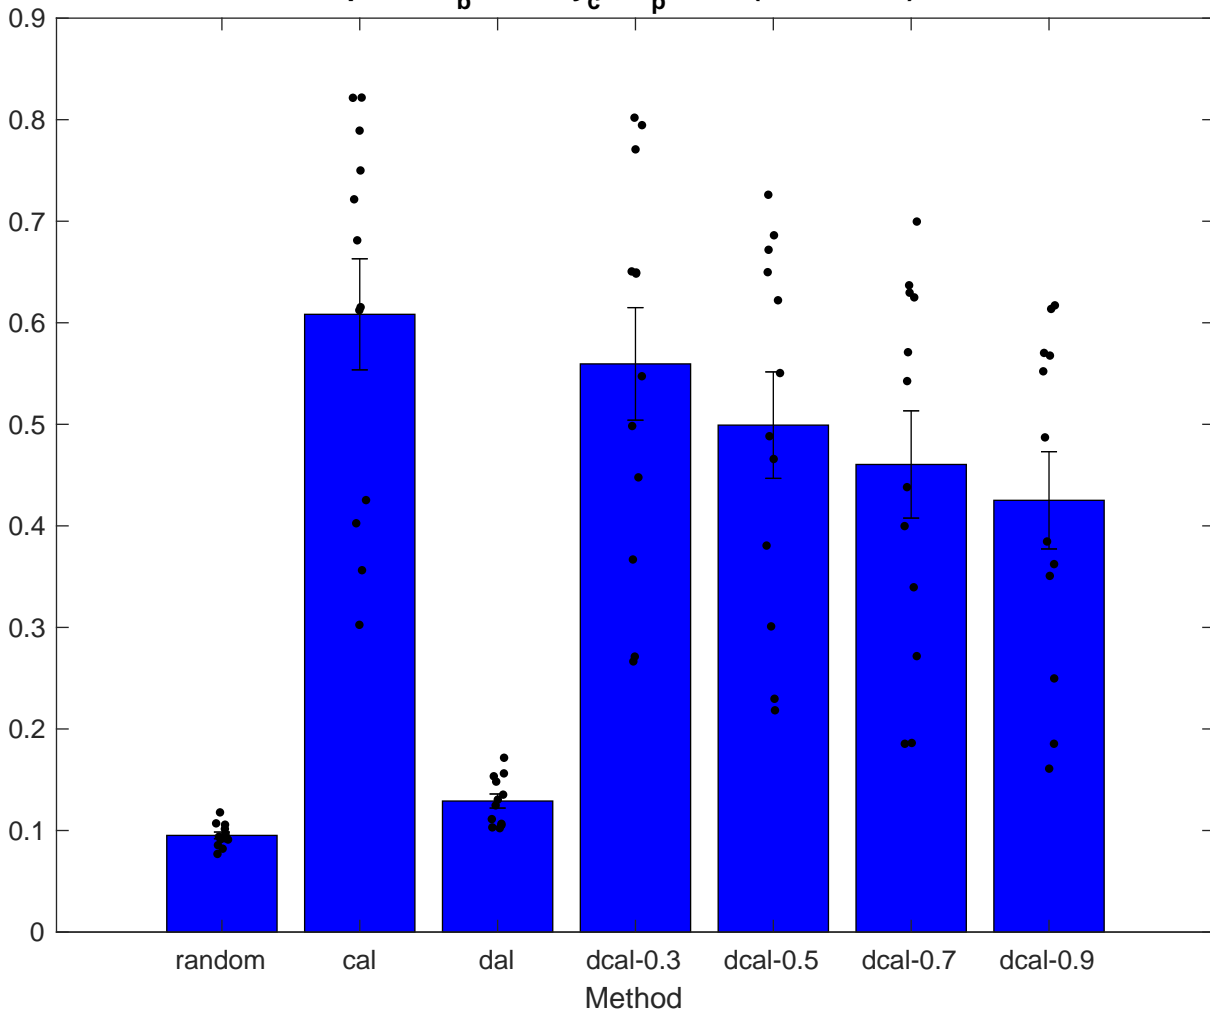

Supplement: Supplementary file 62 [file 90080022263cddafddd4a0726f1fb186-Supplemental-Conference.zip]
