# Supplementary material
Source: ML conference proceedings conference paper supplement (https://proceedings.neurips.cc/paper_files/paper/2024/hash/90080022263cddafddd4a0726f1fb186-Abstract.html)

Accuracy

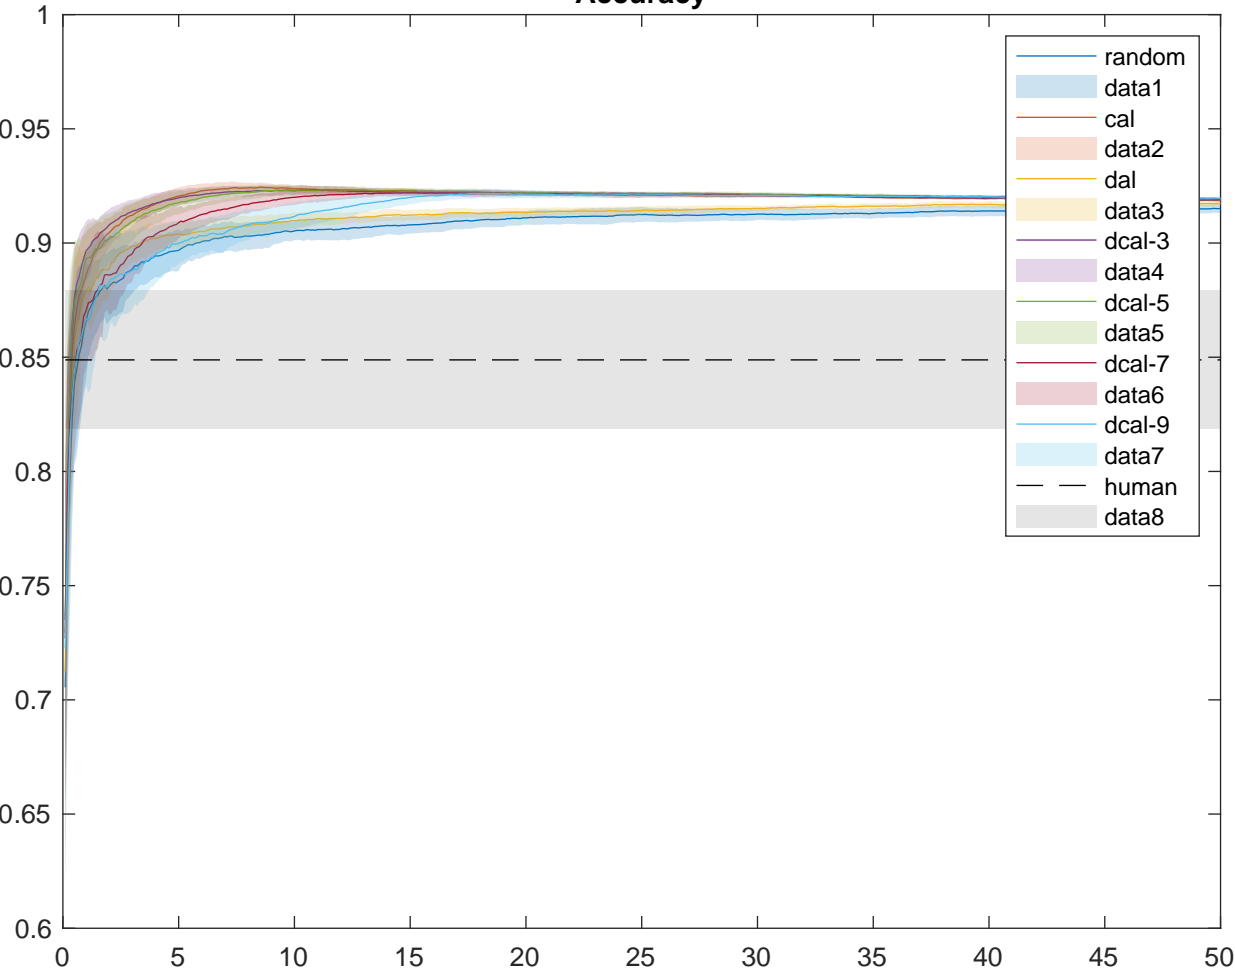

Supplement: Supplementary file 1 [file 90080022263cddafddd4a0726f1fb186-Supplemental-Conference.zip]

Accuracy-200

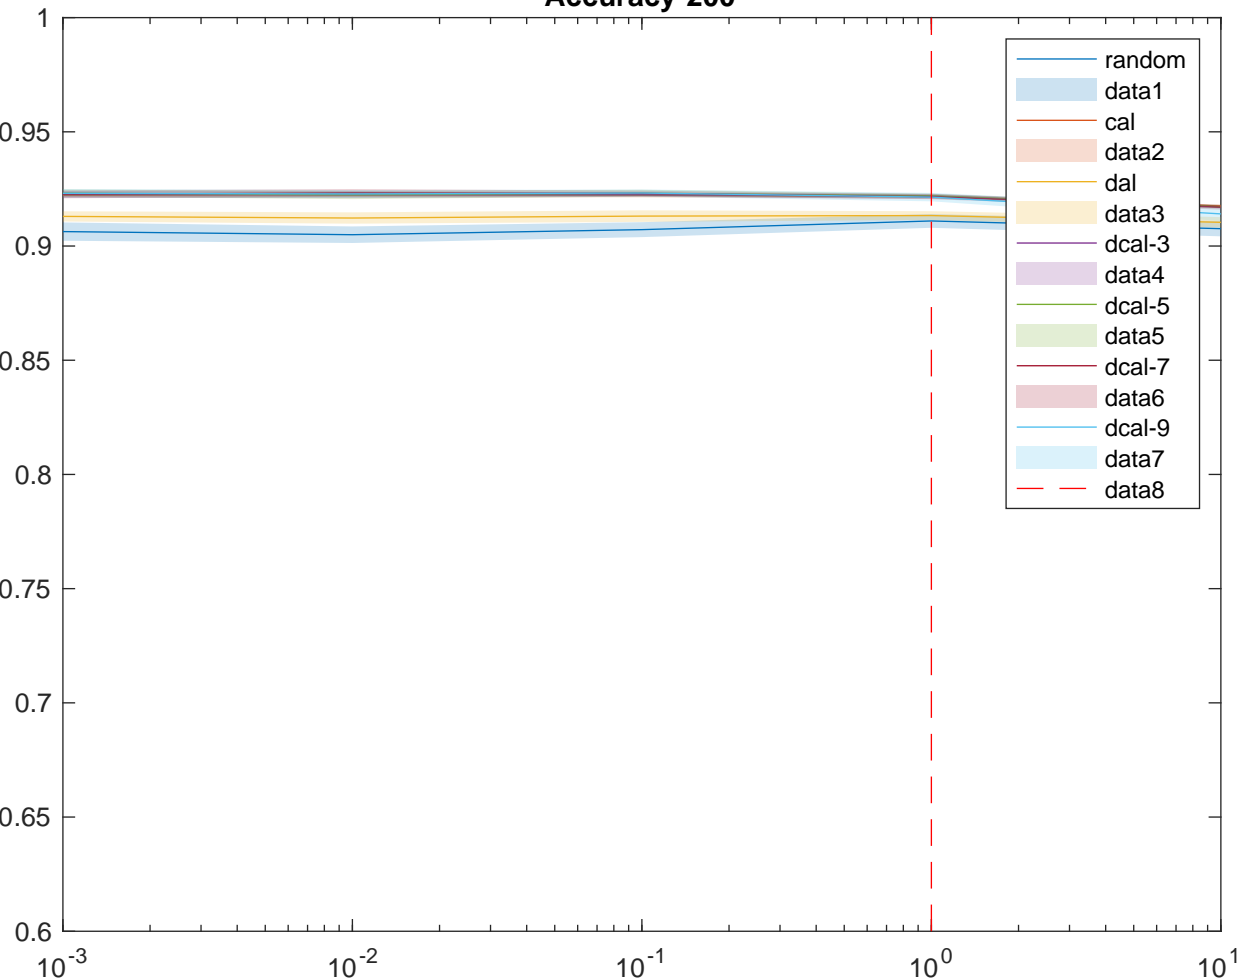

Supplement: Supplementary file 2 [file 90080022263cddafddd4a0726f1fb186-Supplemental-Conference.zip]

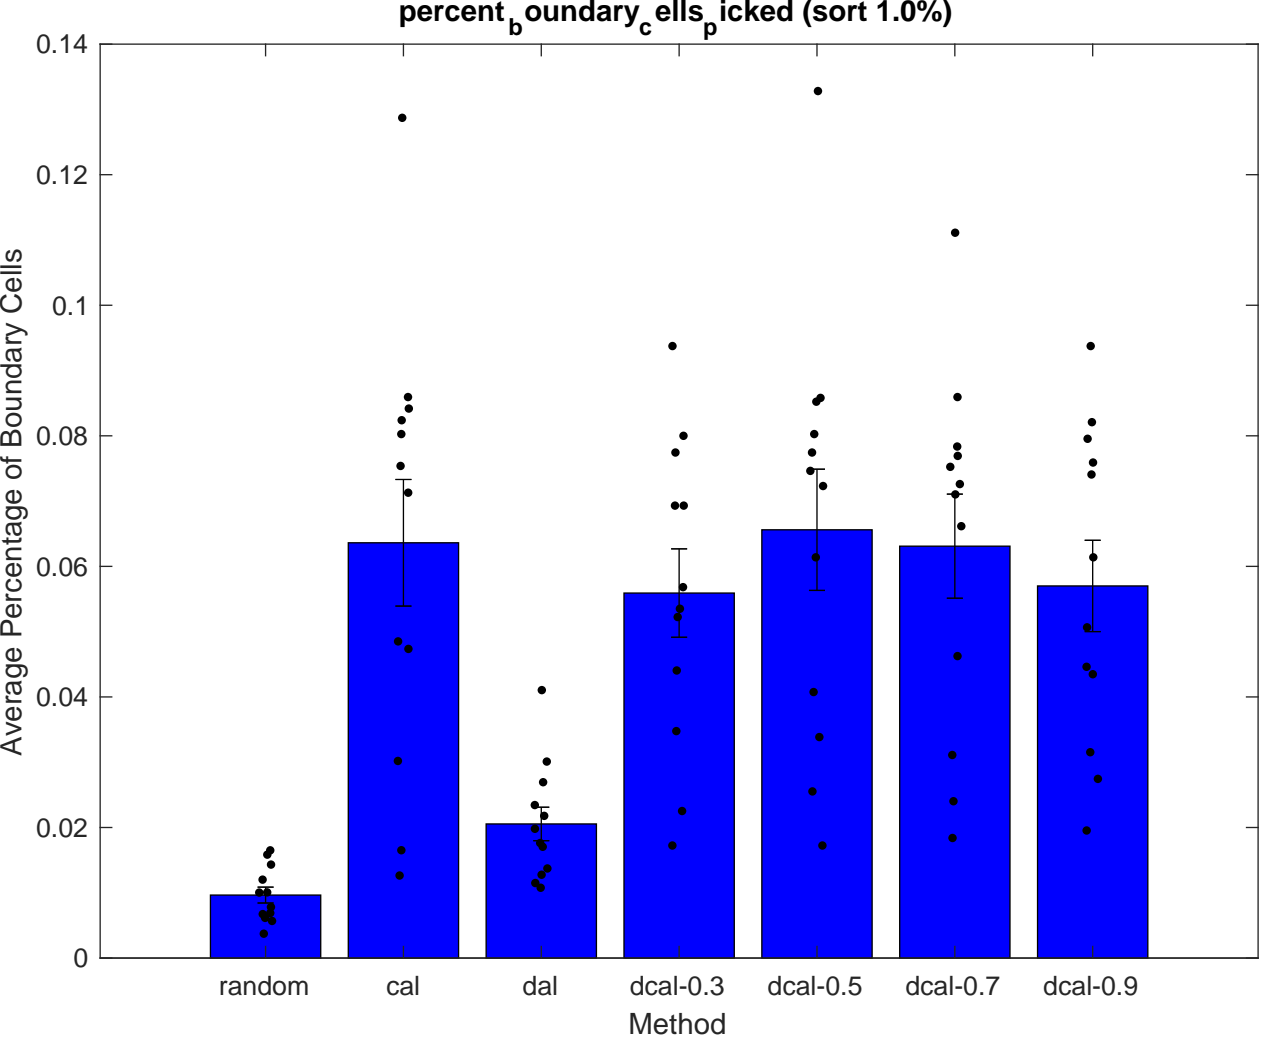

Supplement: Supplementary file 3 [file 90080022263cddafddd4a0726f1fb186-Supplemental-Conference.zip]

Recall

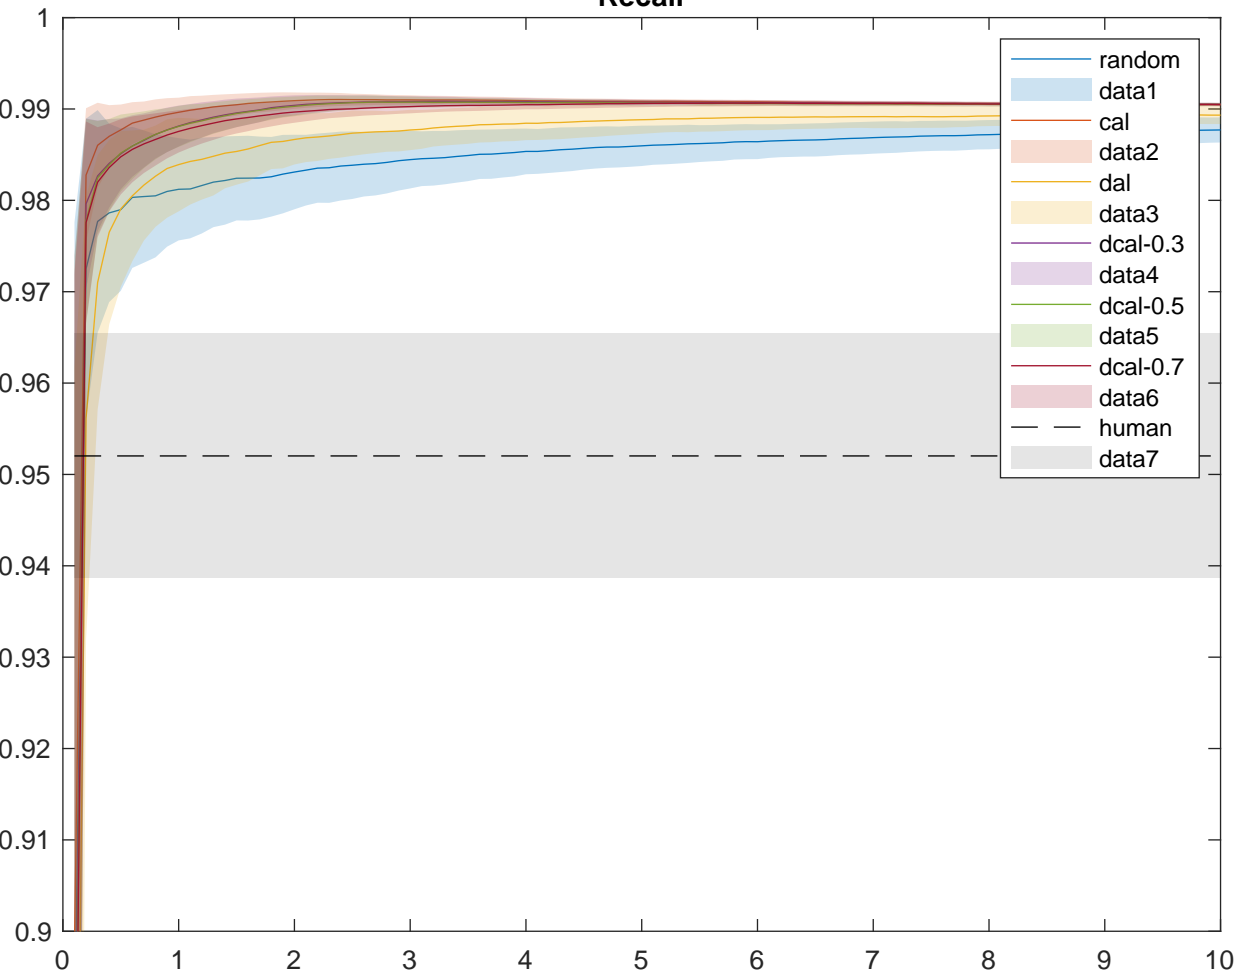

Supplement: Supplementary file 4 [file 90080022263cddafddd4a0726f1fb186-Supplemental-Conference.zip]

True Positive Rate

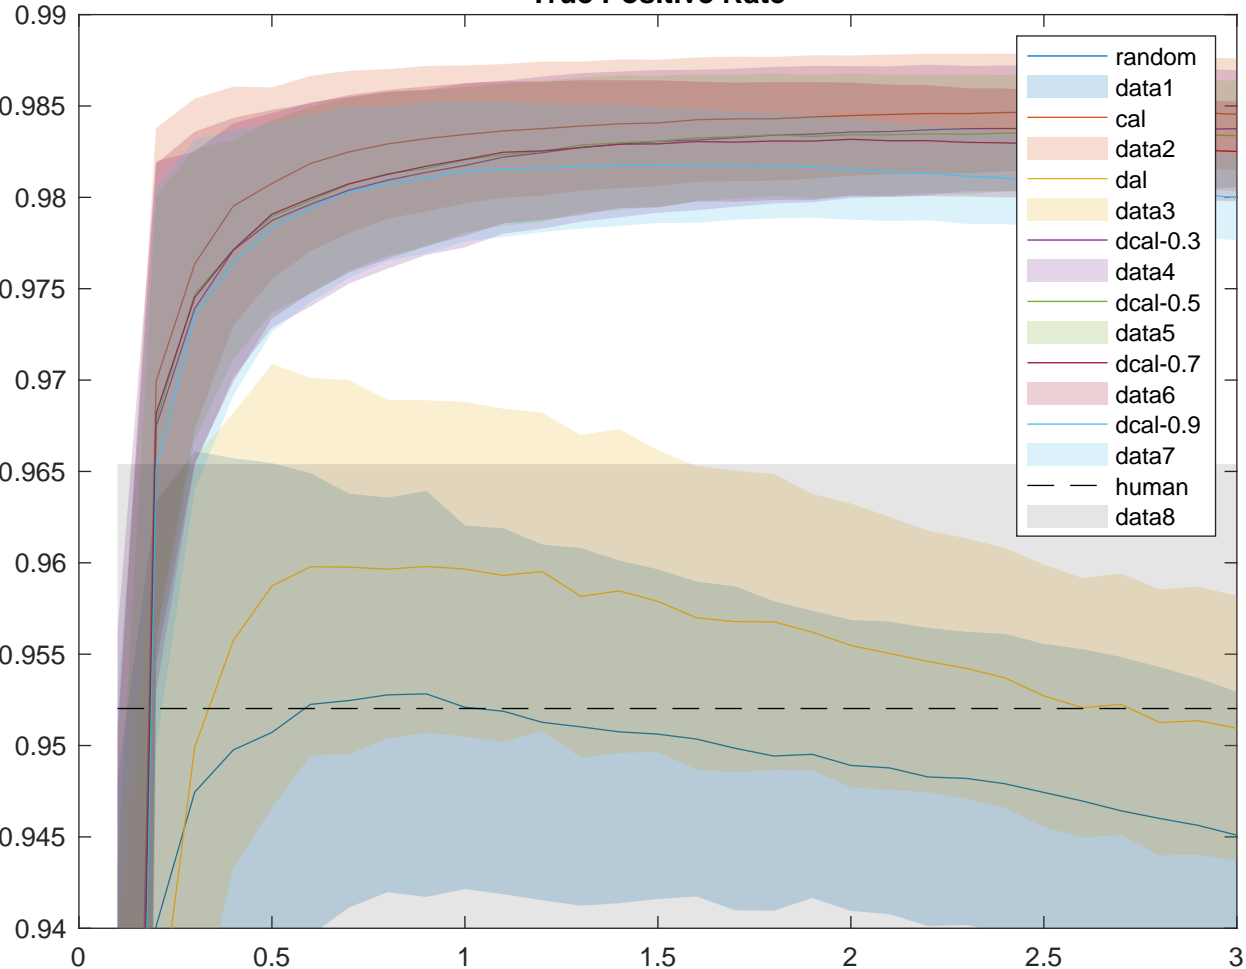

Supplement: Supplementary file 5 [file 90080022263cddafddd4a0726f1fb186-Supplemental-Conference.zip]

Accuracy

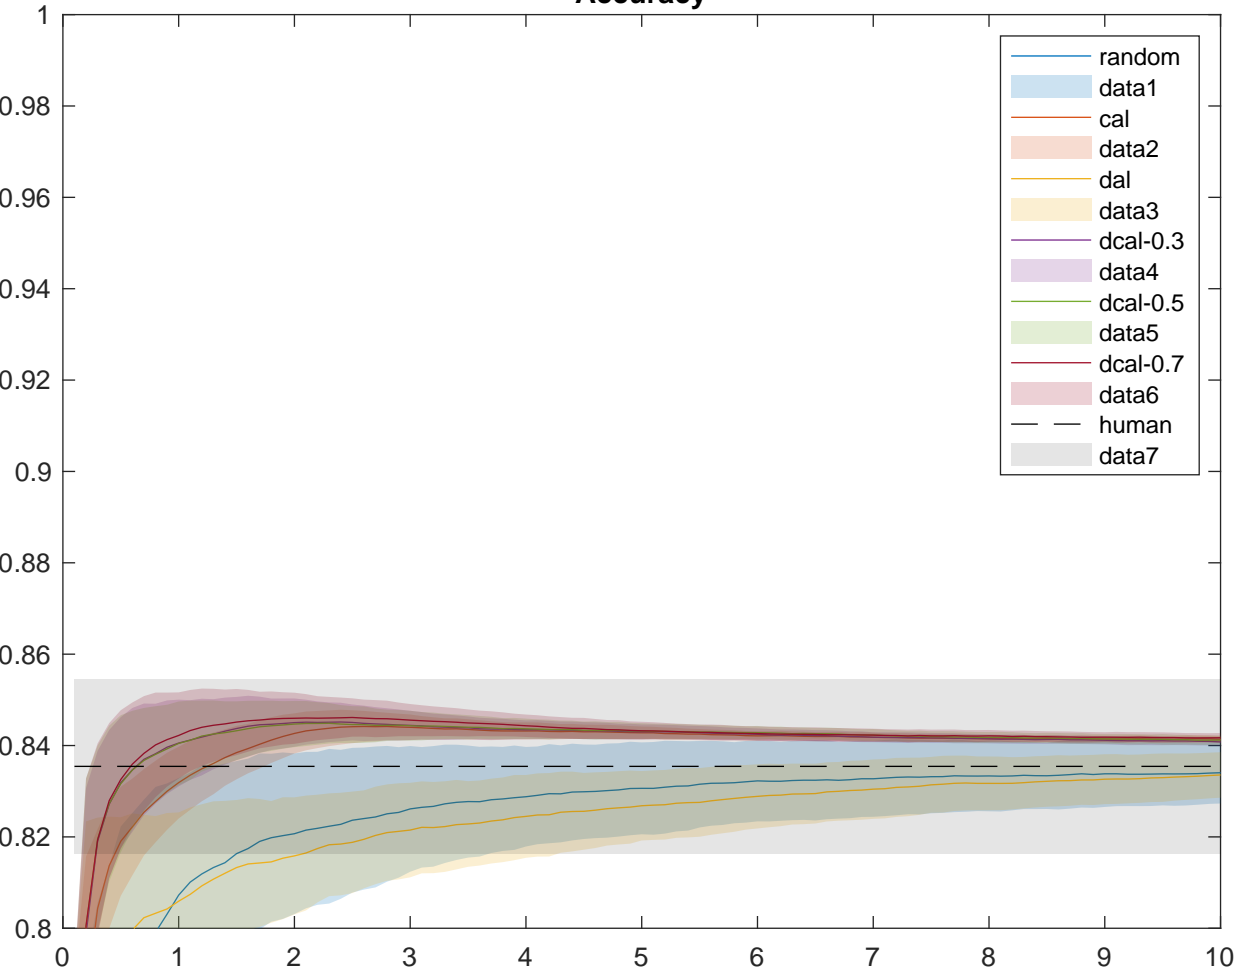

Supplement: Supplementary file 6 [file 90080022263cddafddd4a0726f1fb186-Supplemental-Conference.zip]

Accuracy

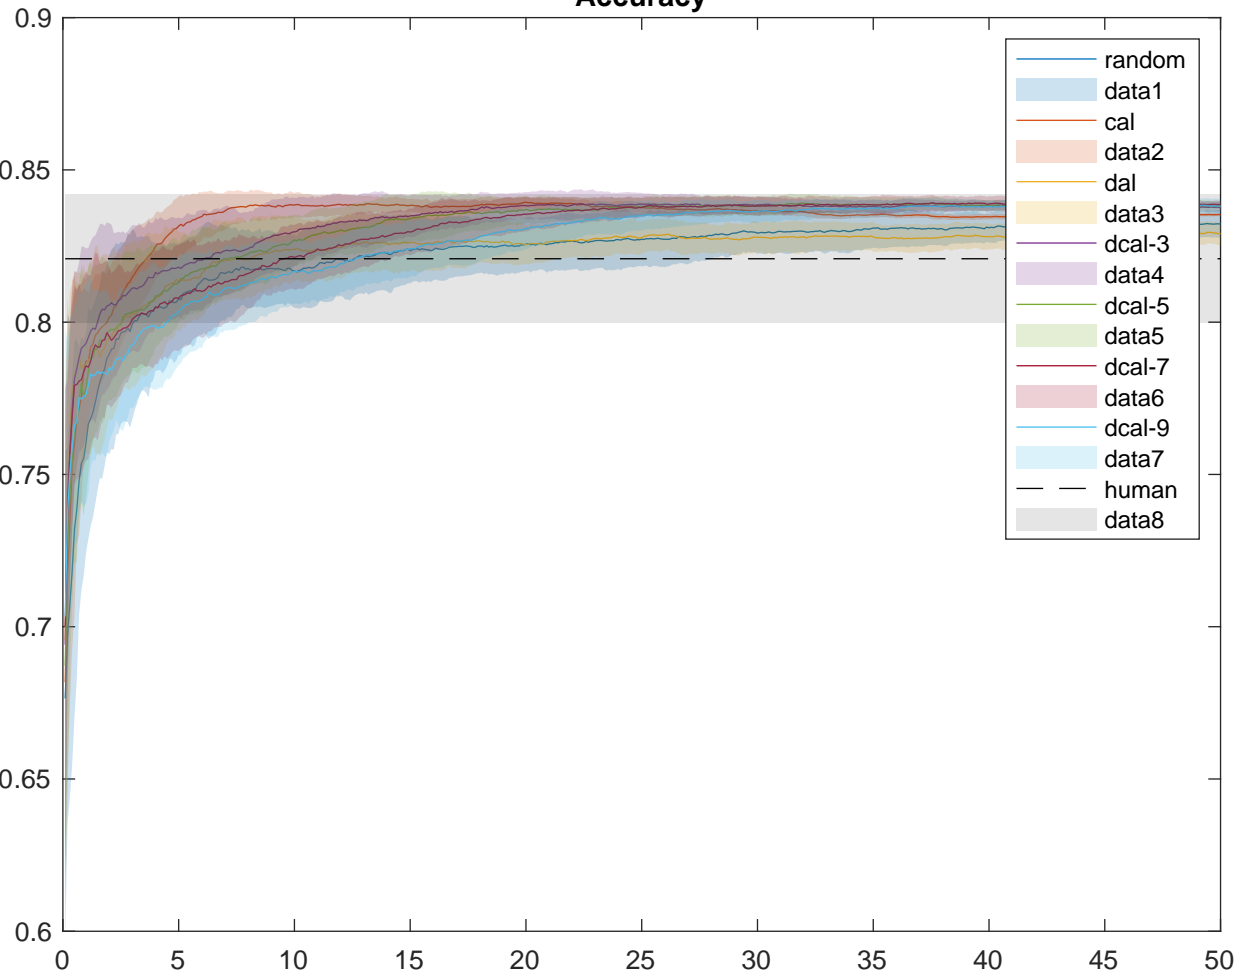

Supplement: Supplementary file 7 [file 90080022263cddafddd4a0726f1fb186-Supplemental-Conference.zip]

Precision

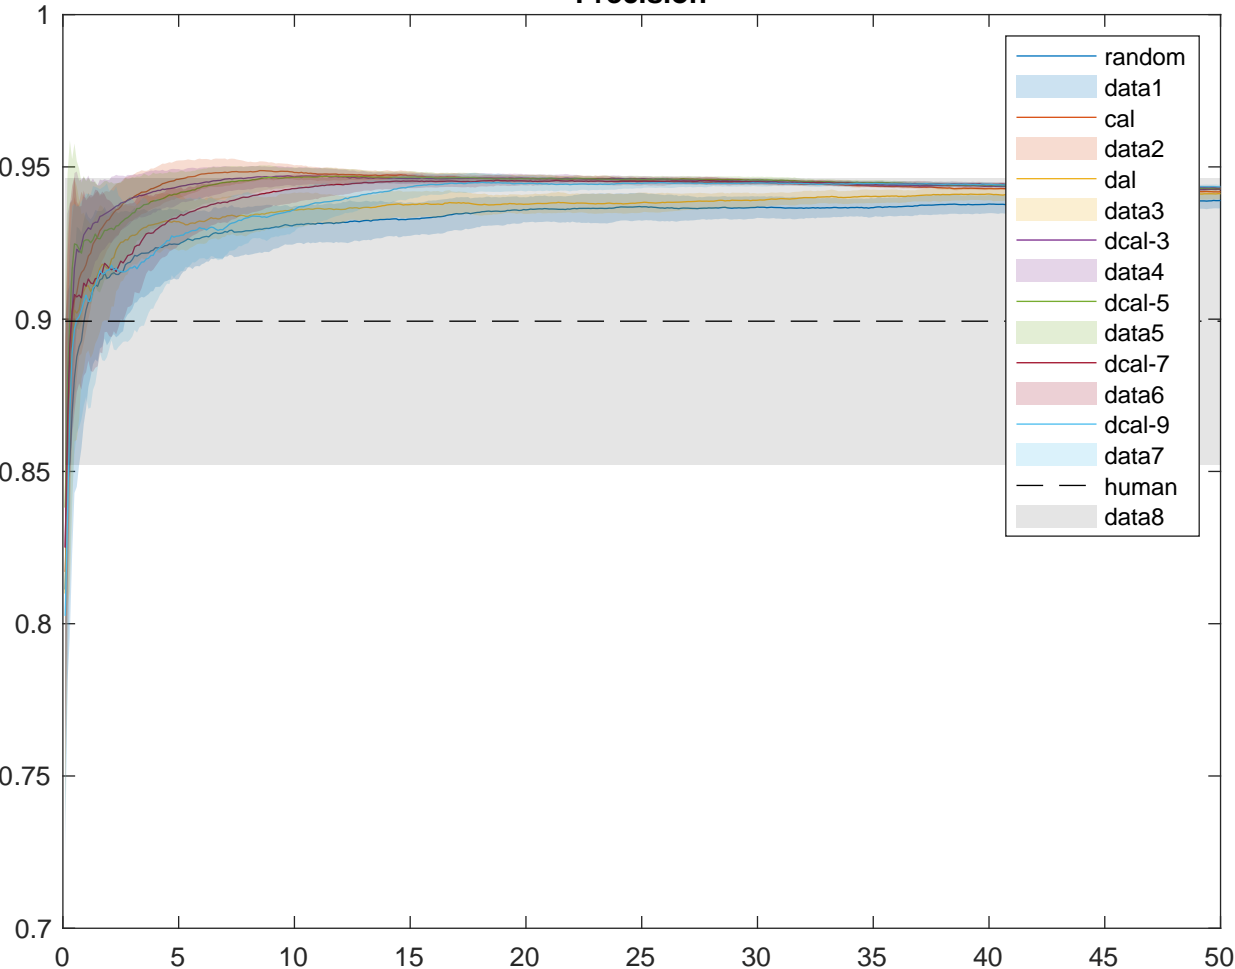

Supplement: Supplementary file 8 [file 90080022263cddafddd4a0726f1fb186-Supplemental-Conference.zip]

percent<sub>2-2</sub> spicked<sub>a</sub> || (sort 3.0%)

Average Agreement Percentage

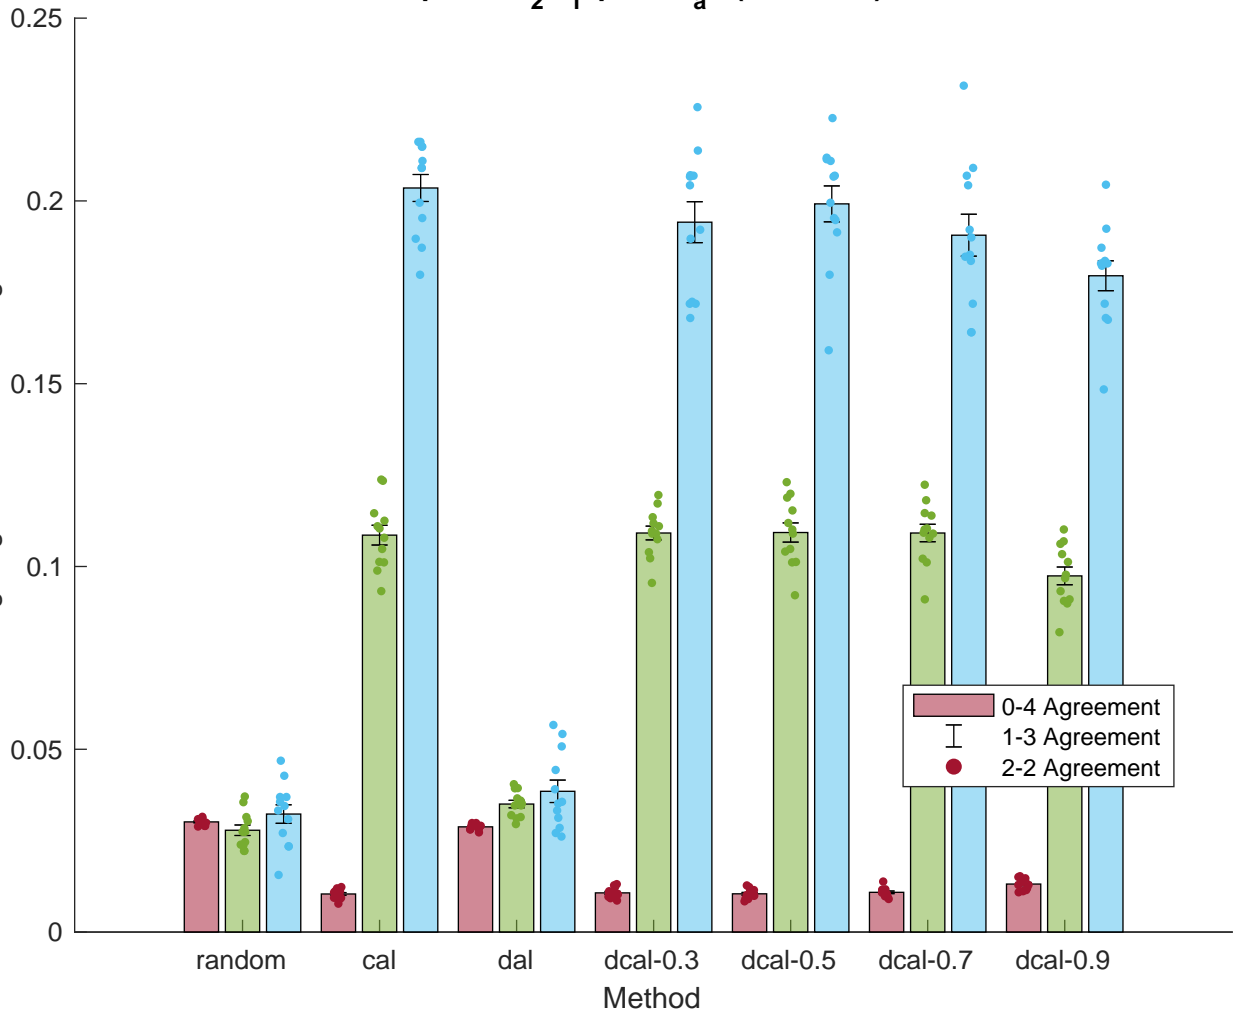

Supplement: Supplementary file 9 [file 90080022263cddafddd4a0726f1fb186-Supplemental-Conference.zip]

percent<sub>2</sub>-2<sub>i</sub>spicked<sub>a</sub> || (sort 5.0%)

Average Agreement Percentage

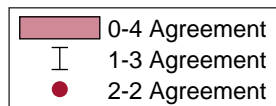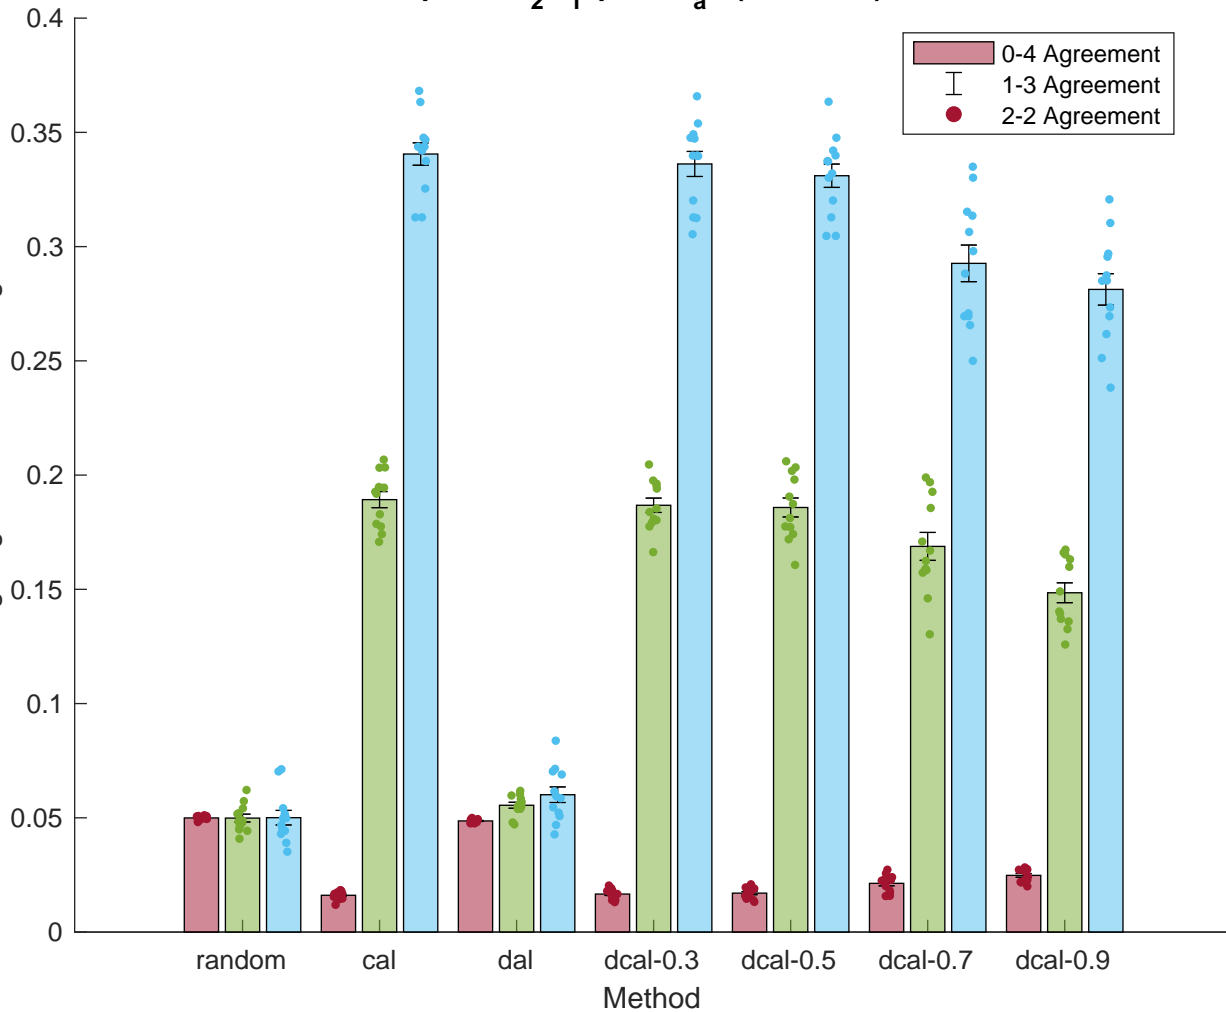

Supplement: Supplementary file 10 [file 90080022263cddafddd4a0726f1fb186-Supplemental-Conference.zip]

Precision

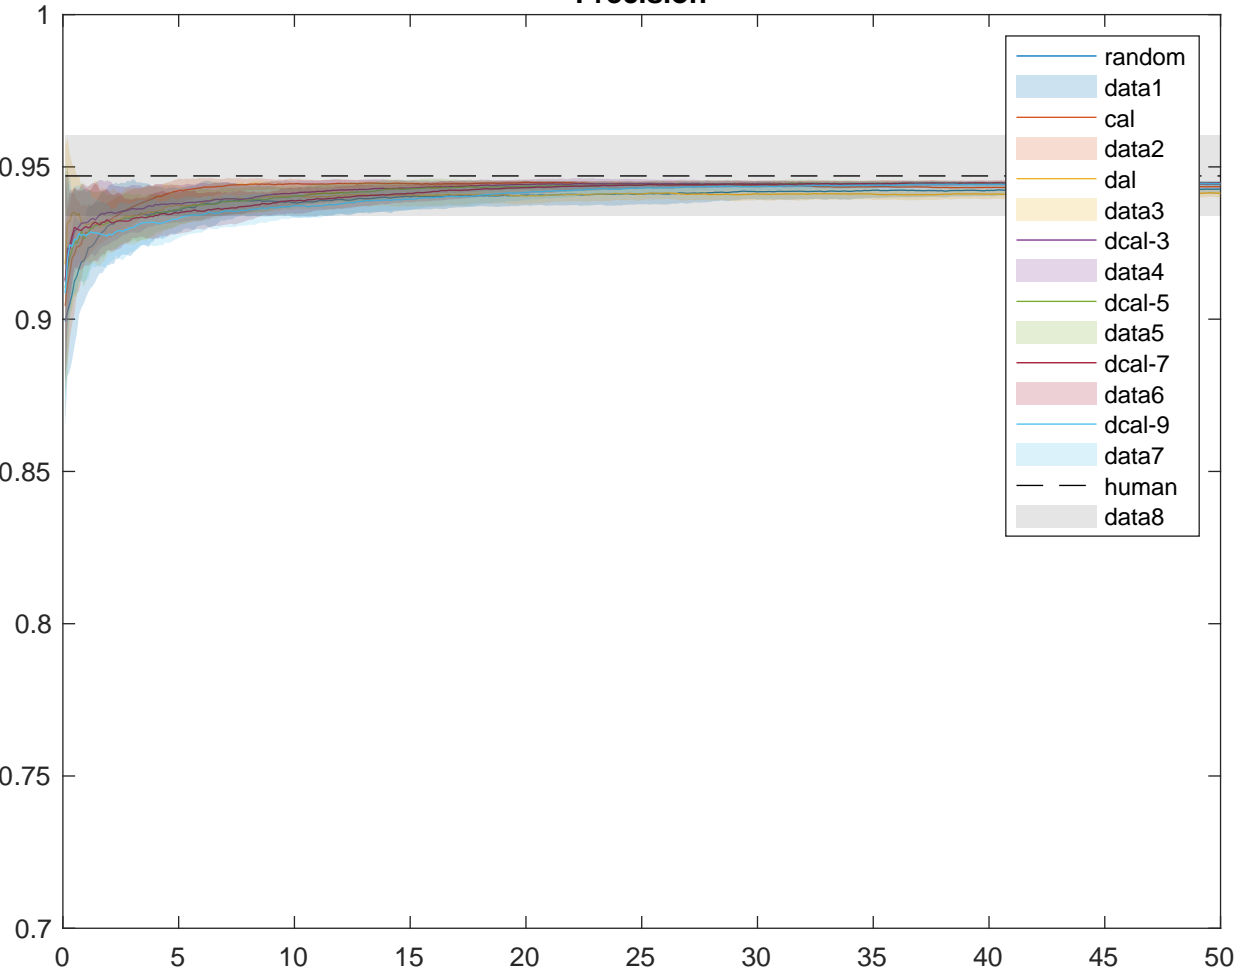

Supplement: Supplementary file 11 [file 90080022263cddafddd4a0726f1fb186-Supplemental-Conference.zip]

True Negative Rate-10

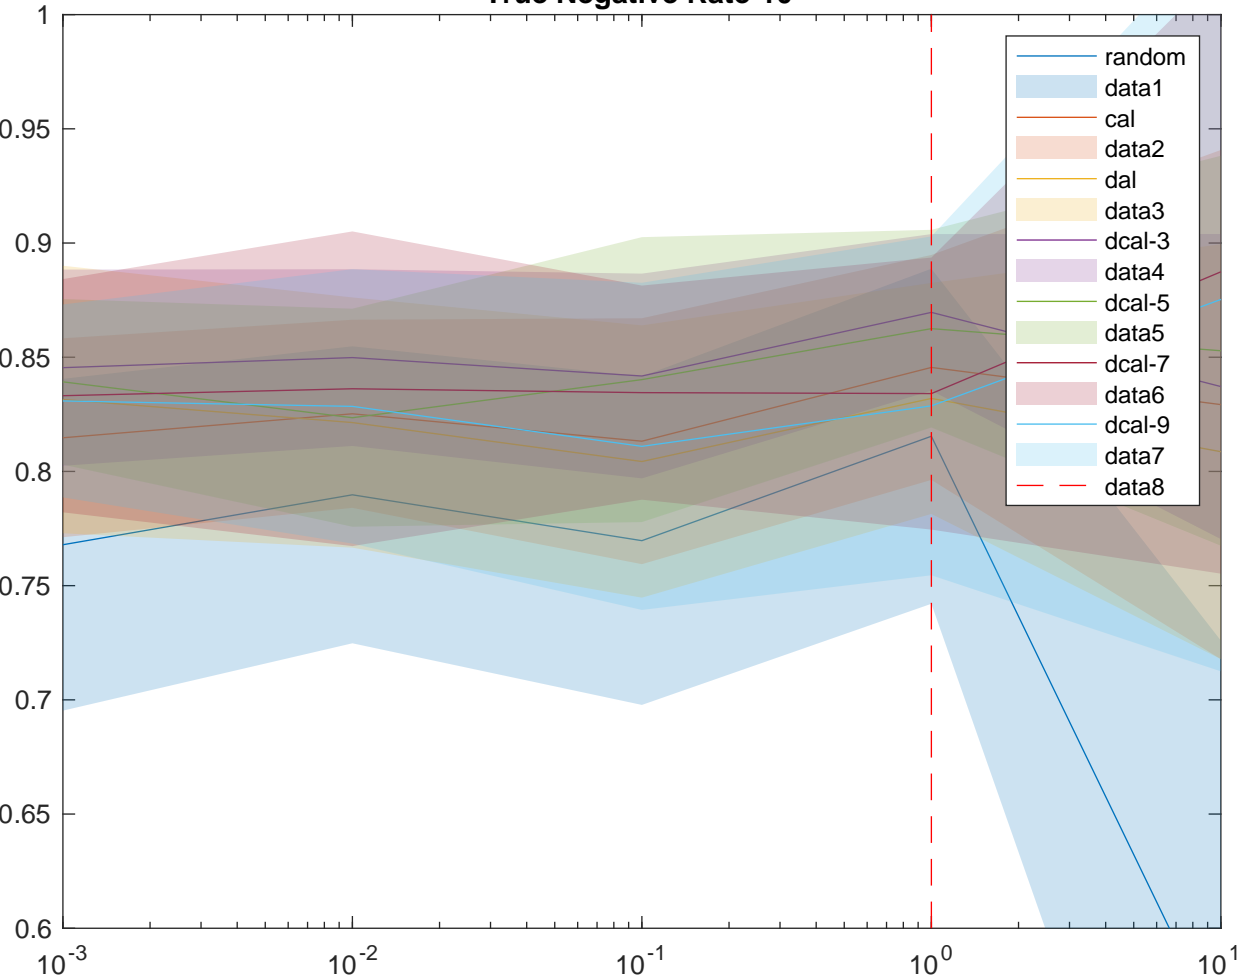

Supplement: Supplementary file 12 [file 90080022263cddafddd4a0726f1fb186-Supplemental-Conference.zip]

True Positive Rate

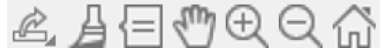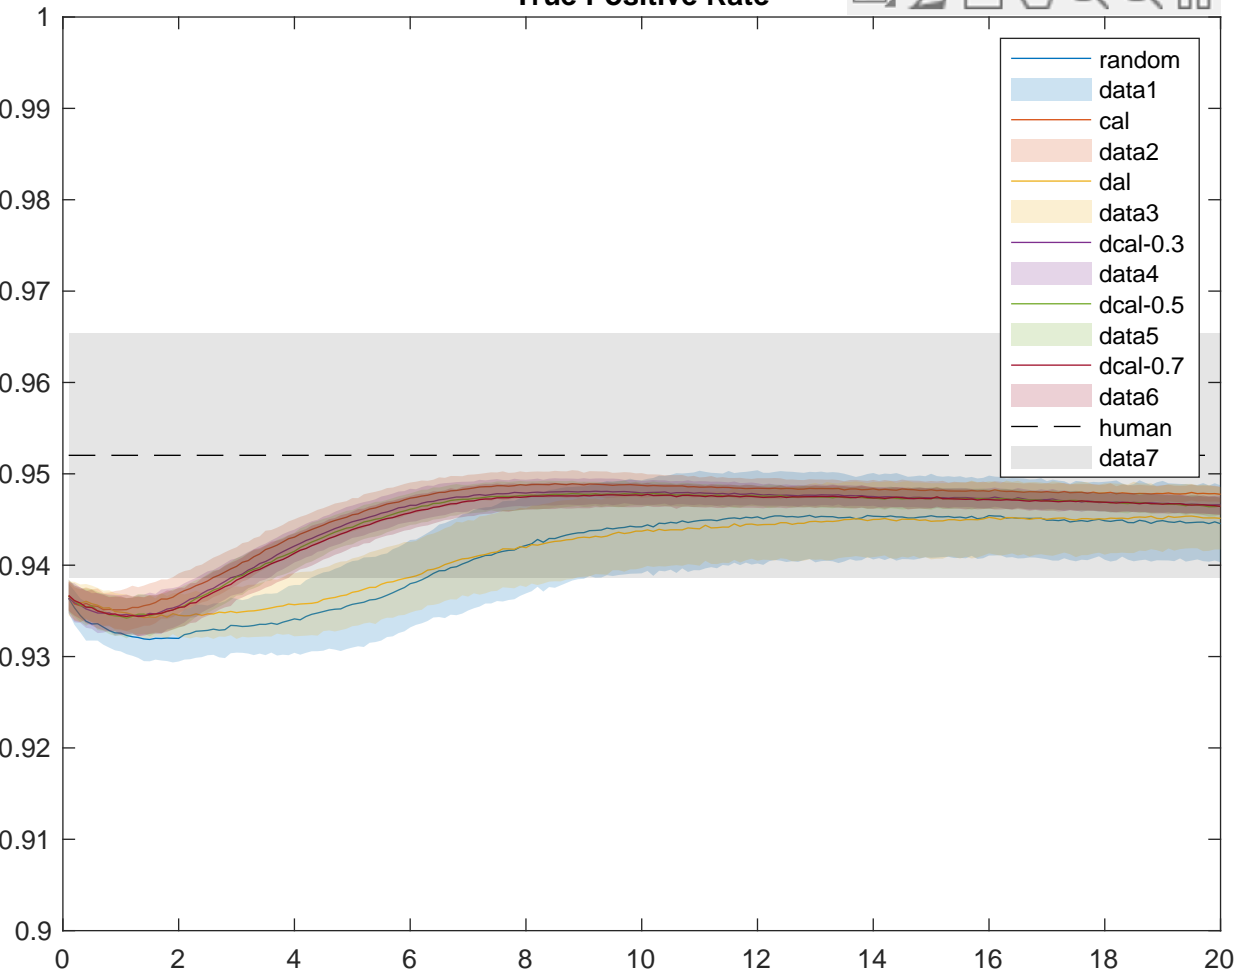

Supplement: Supplementary file 13 [file 90080022263cddafddd4a0726f1fb186-Supplemental-Conference.zip]

Recall

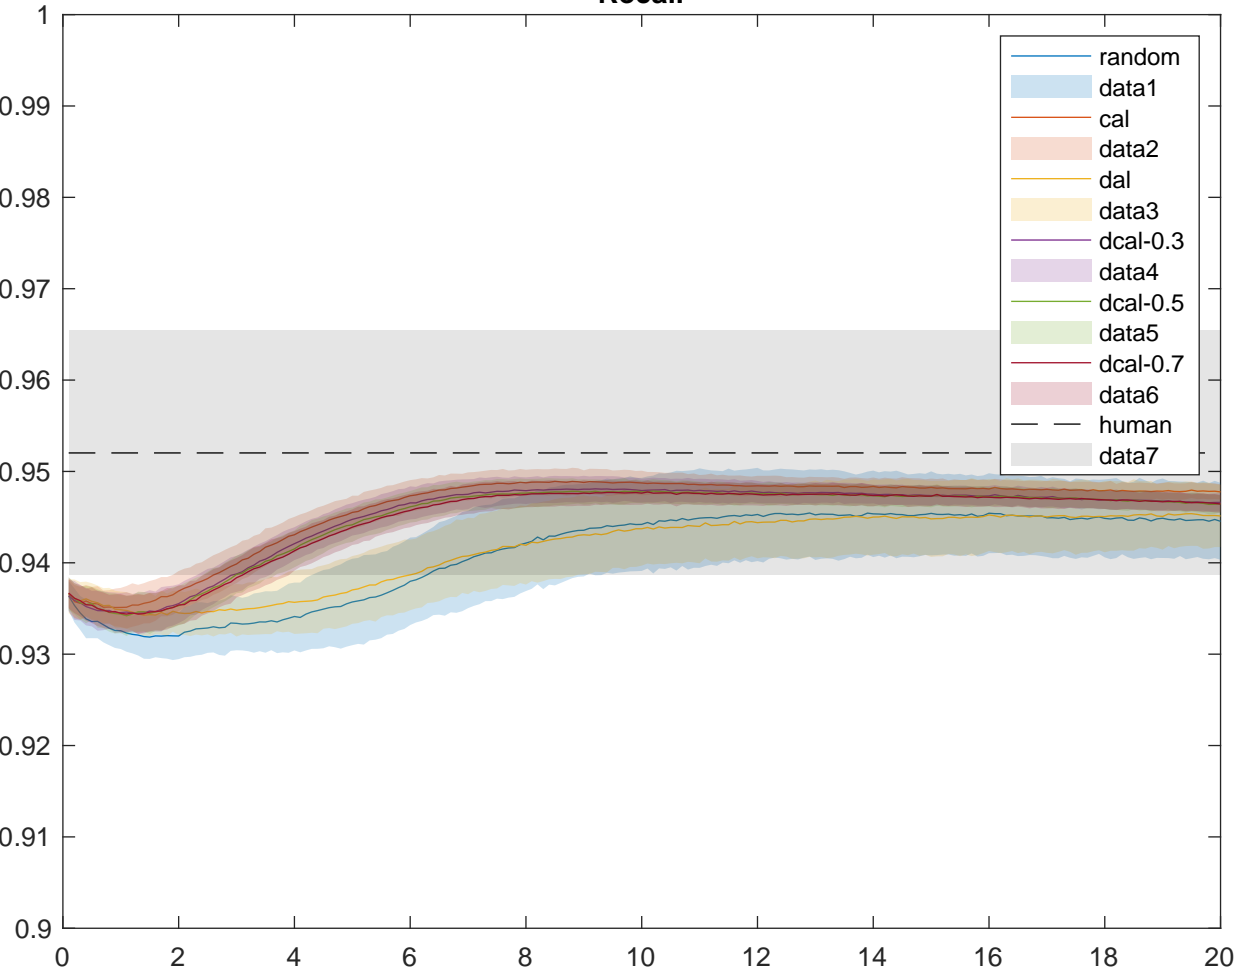

Supplement: Supplementary file 14 [file 90080022263cddafddd4a0726f1fb186-Supplemental-Conference.zip]

percent picked<sub>i</sub>s2-2<sub>a</sub> || (sort 1.0%)

Average Agreement Percentage

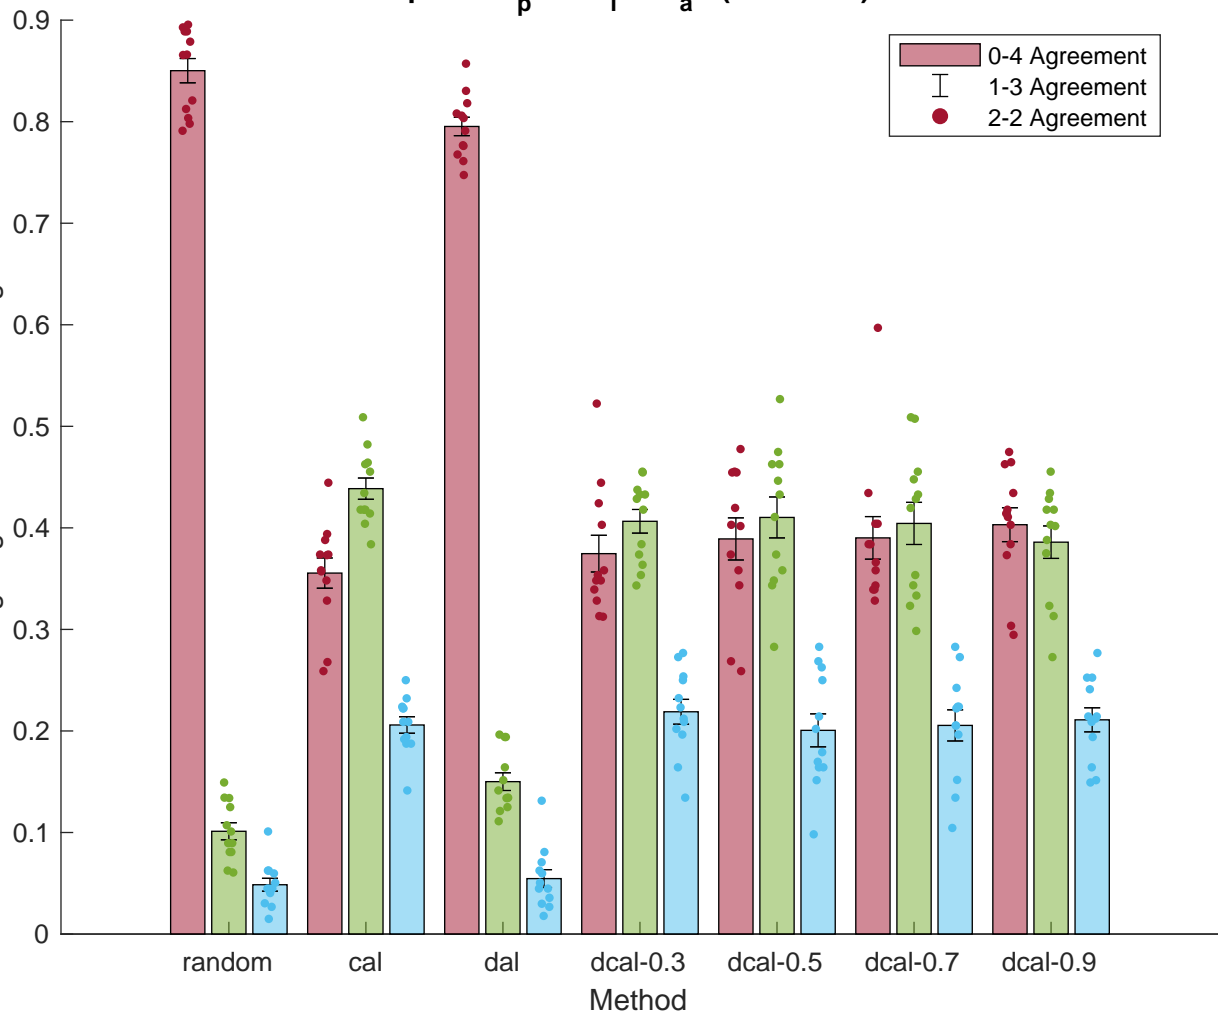

Supplement: Supplementary file 15 [file 90080022263cddafddd4a0726f1fb186-Supplemental-Conference.zip]

percent boundary cells picked (sort 3.0%)

Average Percentage of Boundary Cells

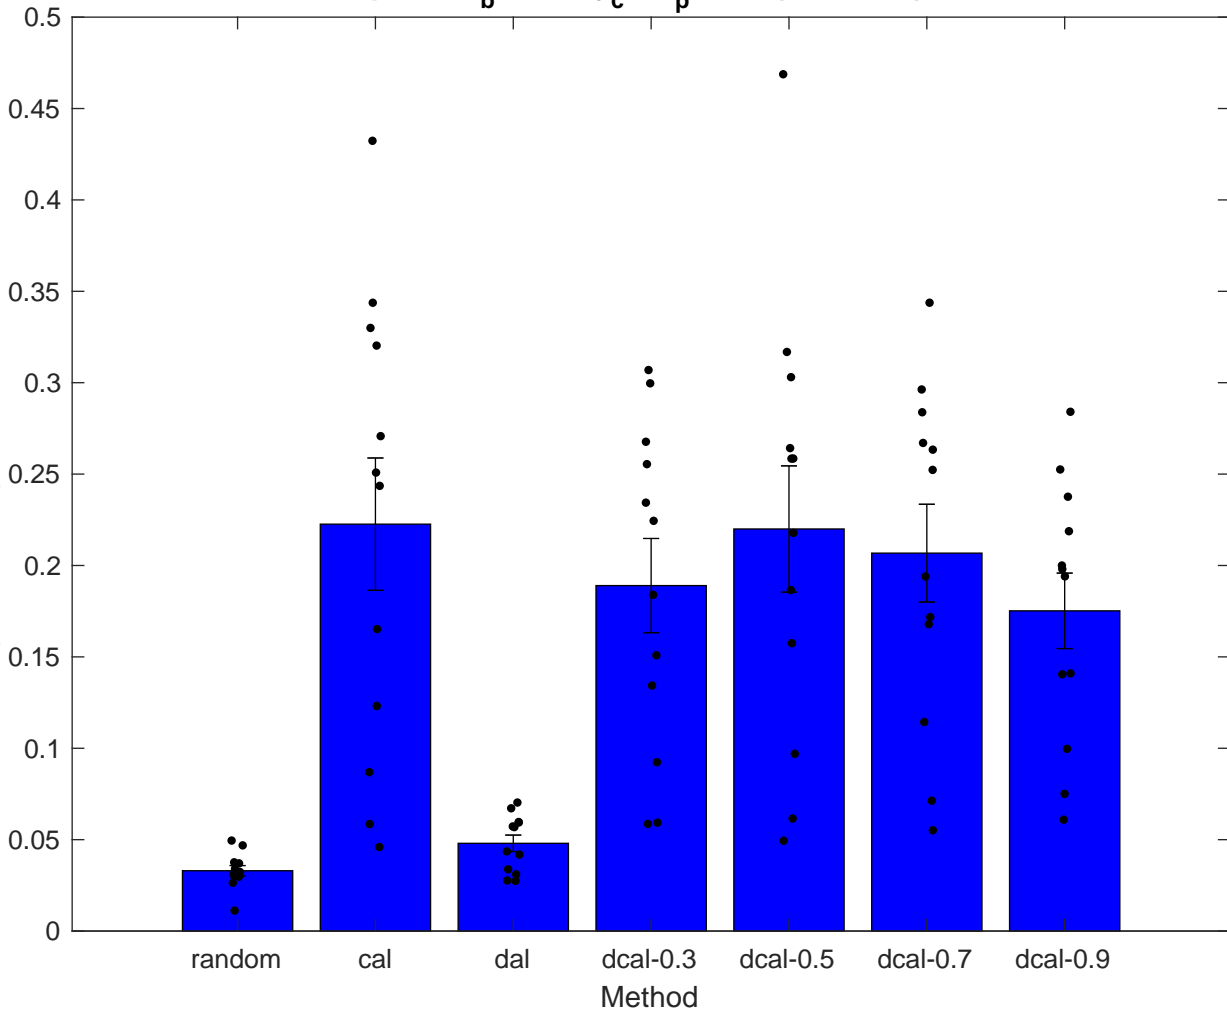

Supplement: Supplementary file 16 [file 90080022263cddafddd4a0726f1fb186-Supplemental-Conference.zip]

## AUC

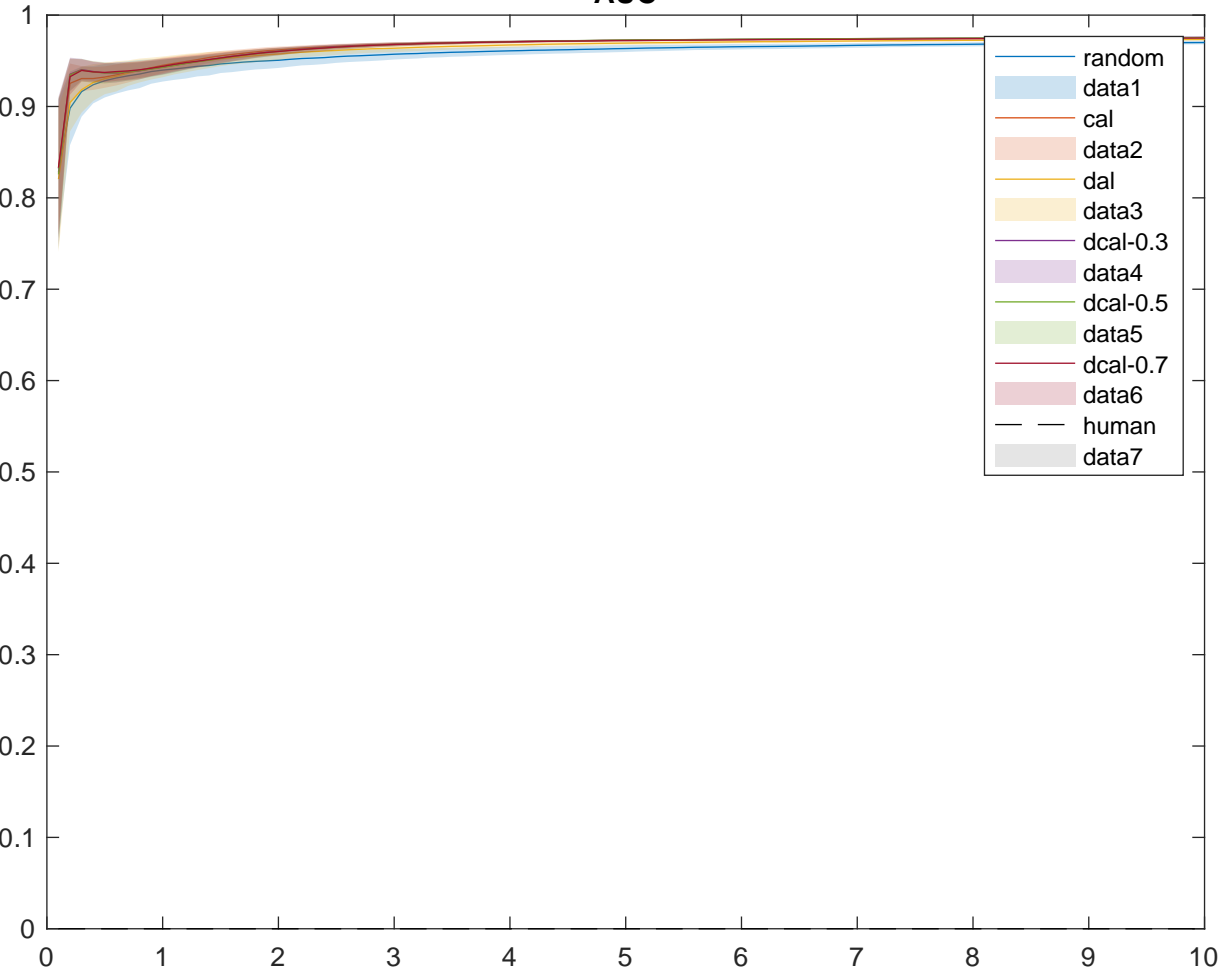

Supplement: Supplementary file 17 [file 90080022263cddafddd4a0726f1fb186-Supplemental-Conference.zip]

True Negative Rate-200

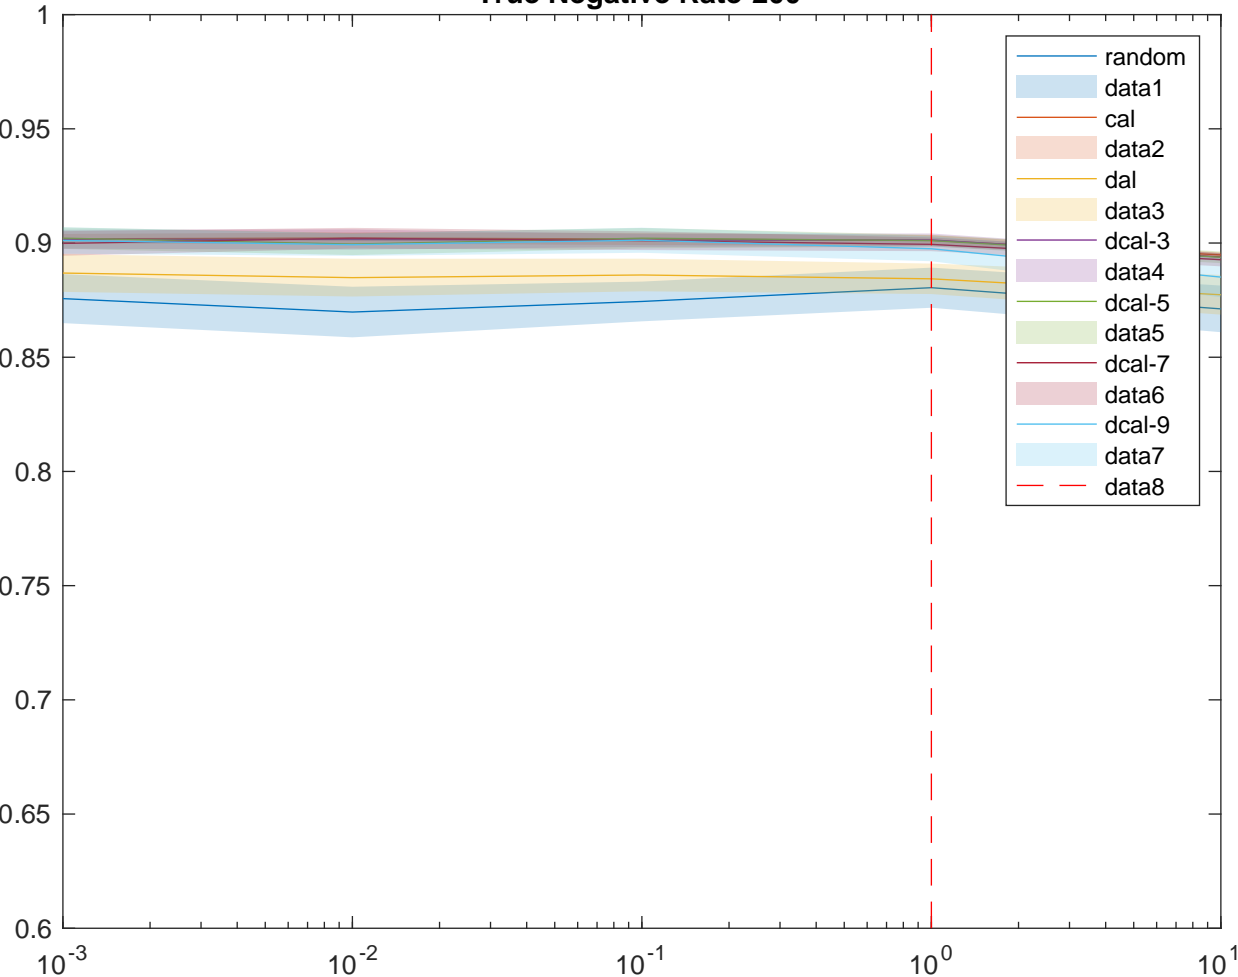

Supplement: Supplementary file 18 [file 90080022263cddafddd4a0726f1fb186-Supplemental-Conference.zip]

percent picked<sub>i</sub>s2-2<sub>a</sub> || (sort 3.0%)

Average Agreement Percentage

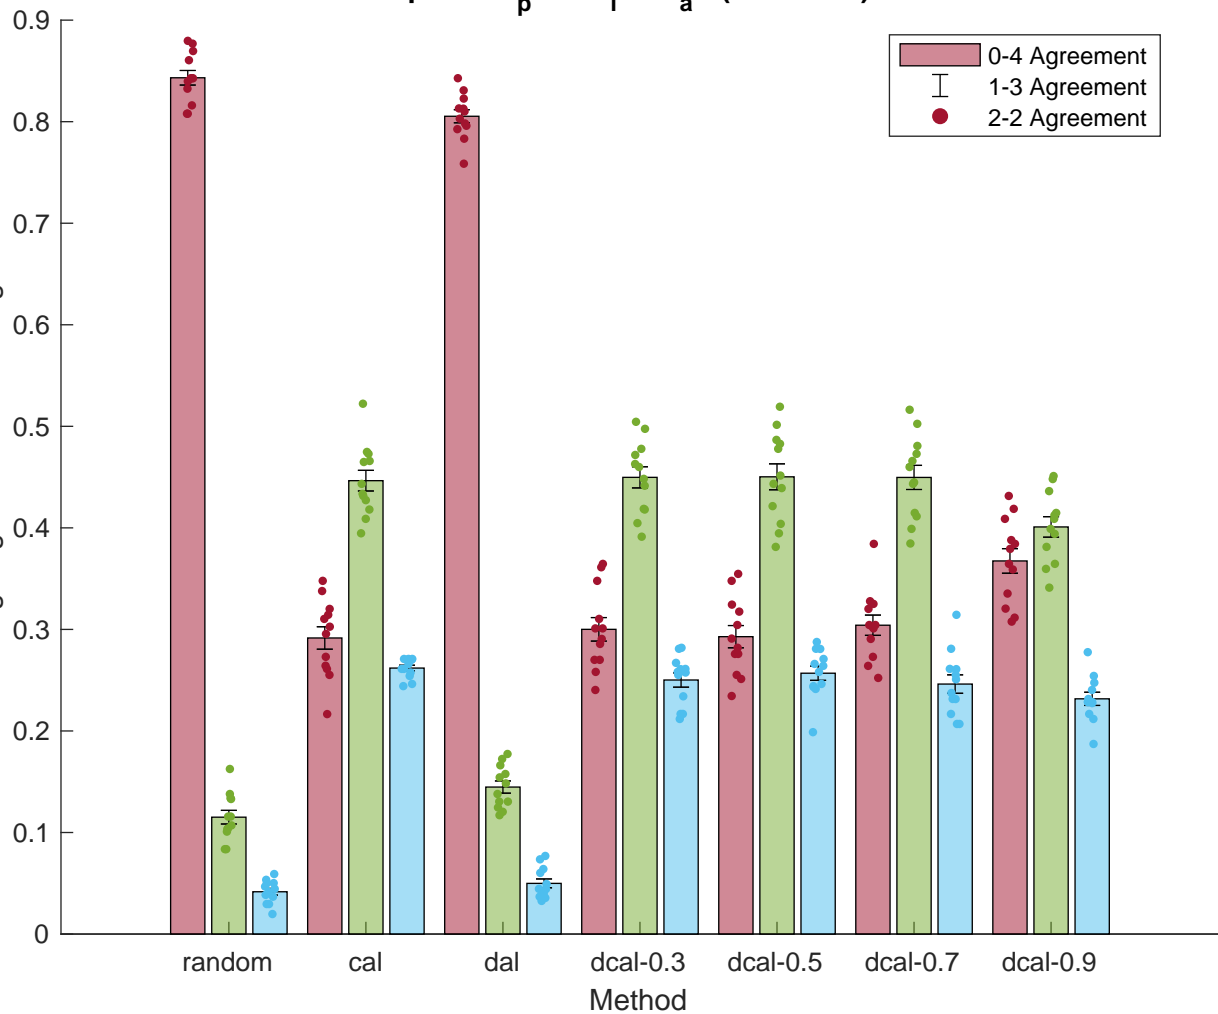

Supplement: Supplementary file 19 [file 90080022263cddafddd4a0726f1fb186-Supplemental-Conference.zip]

AUC-200

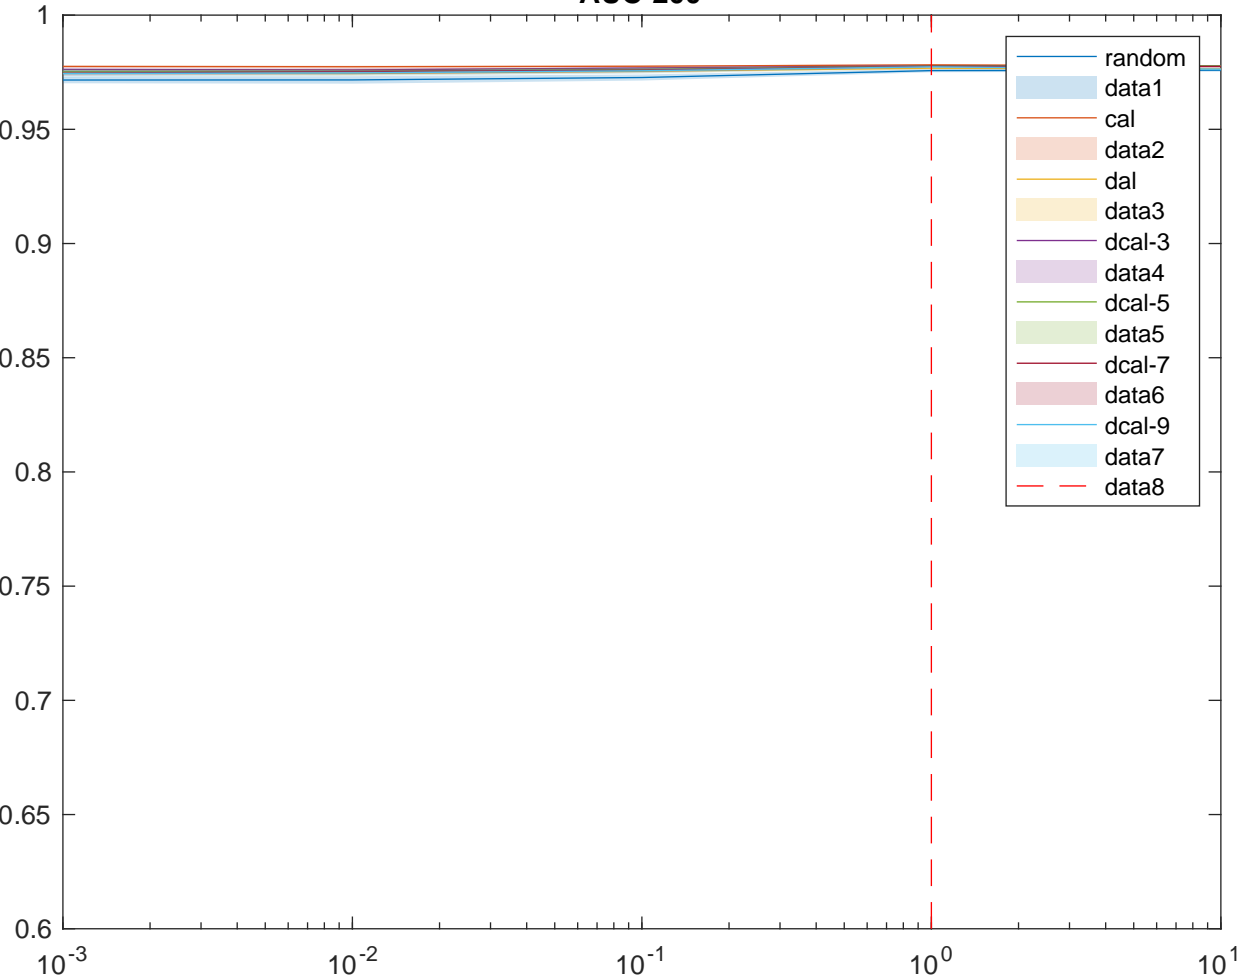

Supplement: Supplementary file 20 [file 90080022263cddafddd4a0726f1fb186-Supplemental-Conference.zip]

True Positive Rate-50

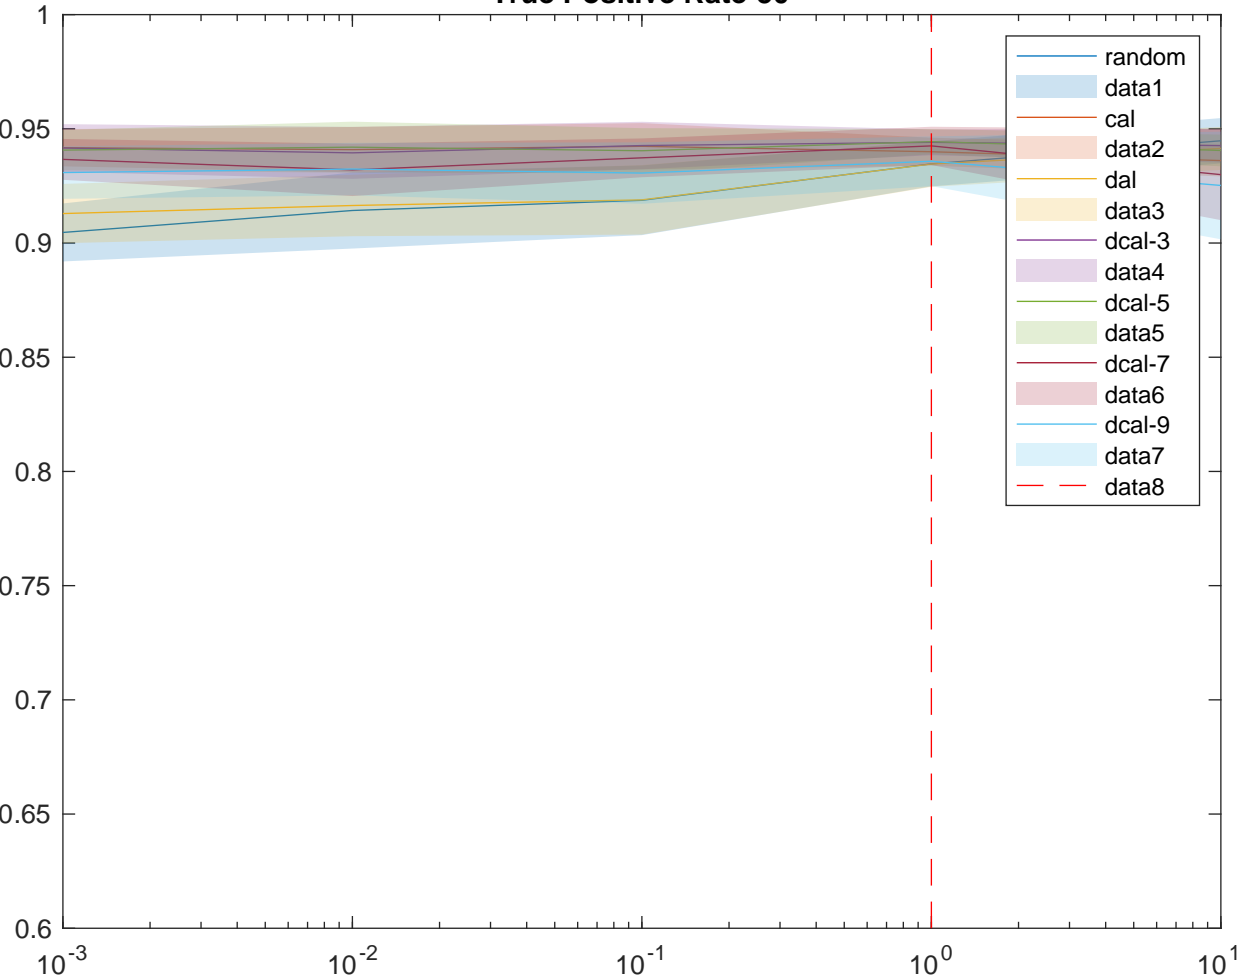

Supplement: Supplementary file 21 [file 90080022263cddafddd4a0726f1fb186-Supplemental-Conference.zip]

True Negative Rate

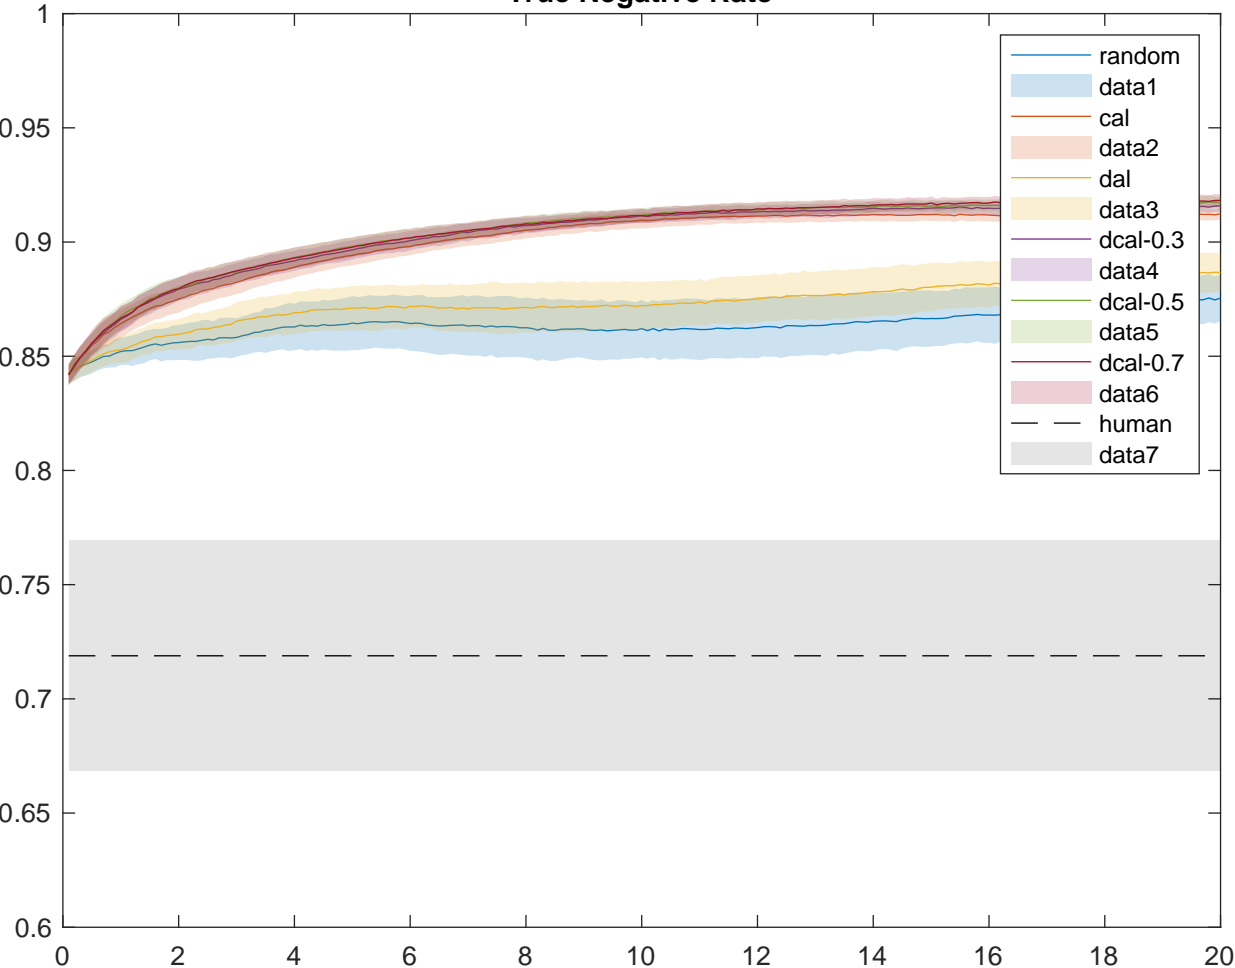

Supplement: Supplementary file 22 [file 90080022263cddafddd4a0726f1fb186-Supplemental-Conference.zip]

distance picked cells (sort 5.0%)

Average Percentage of Boundary Cells

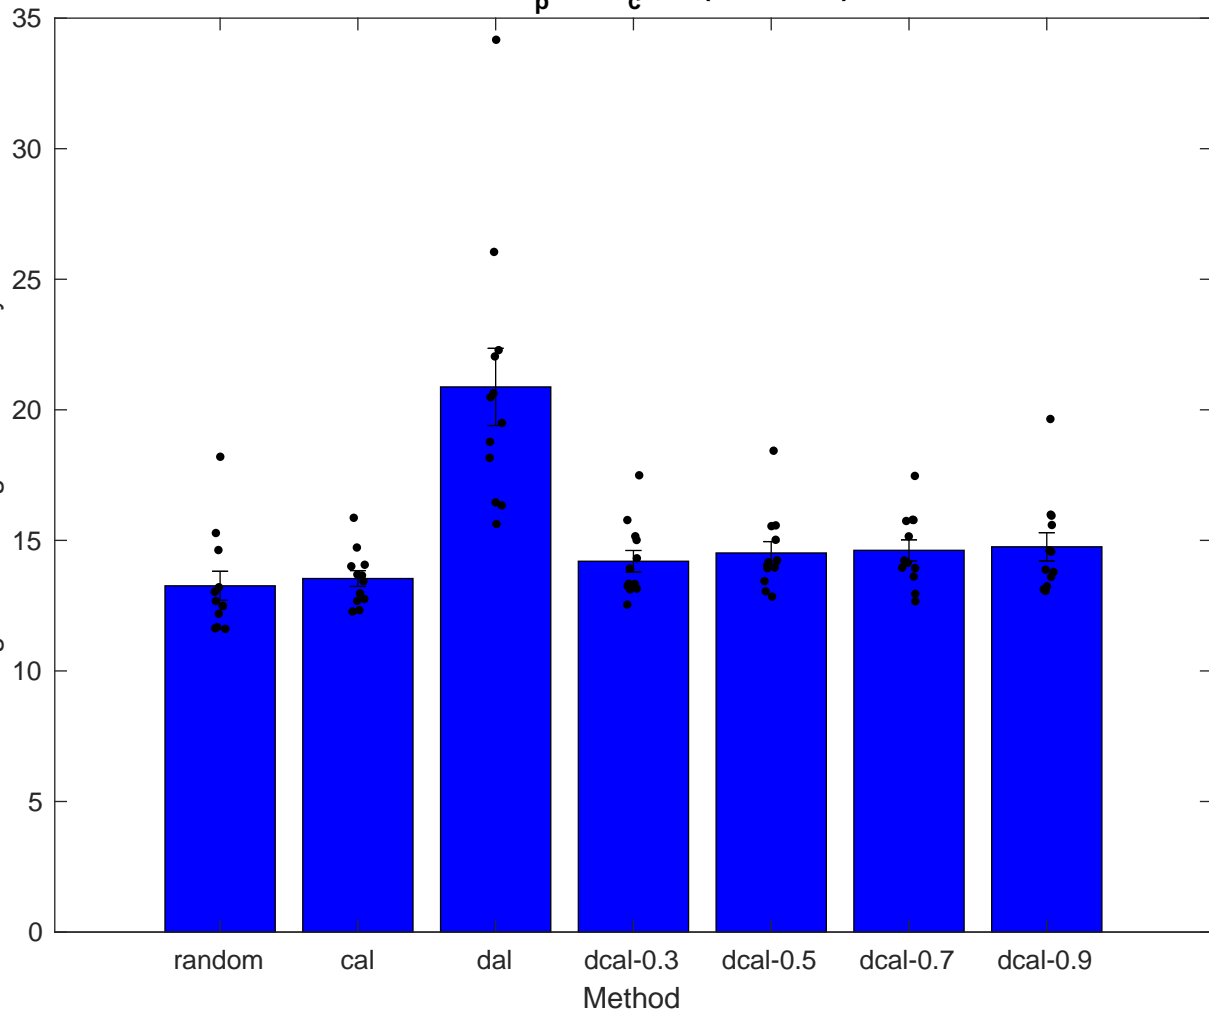

Supplement: Supplementary file 23 [file 90080022263cddafddd4a0726f1fb186-Supplemental-Conference.zip]

# Ground Truth

- Cell
- Not cell

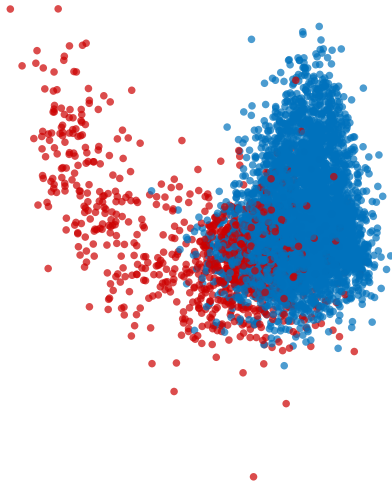

Supplement: Supplementary file 24 [file 90080022263cddafddd4a0726f1fb186-Supplemental-Conference.zip]

Recall

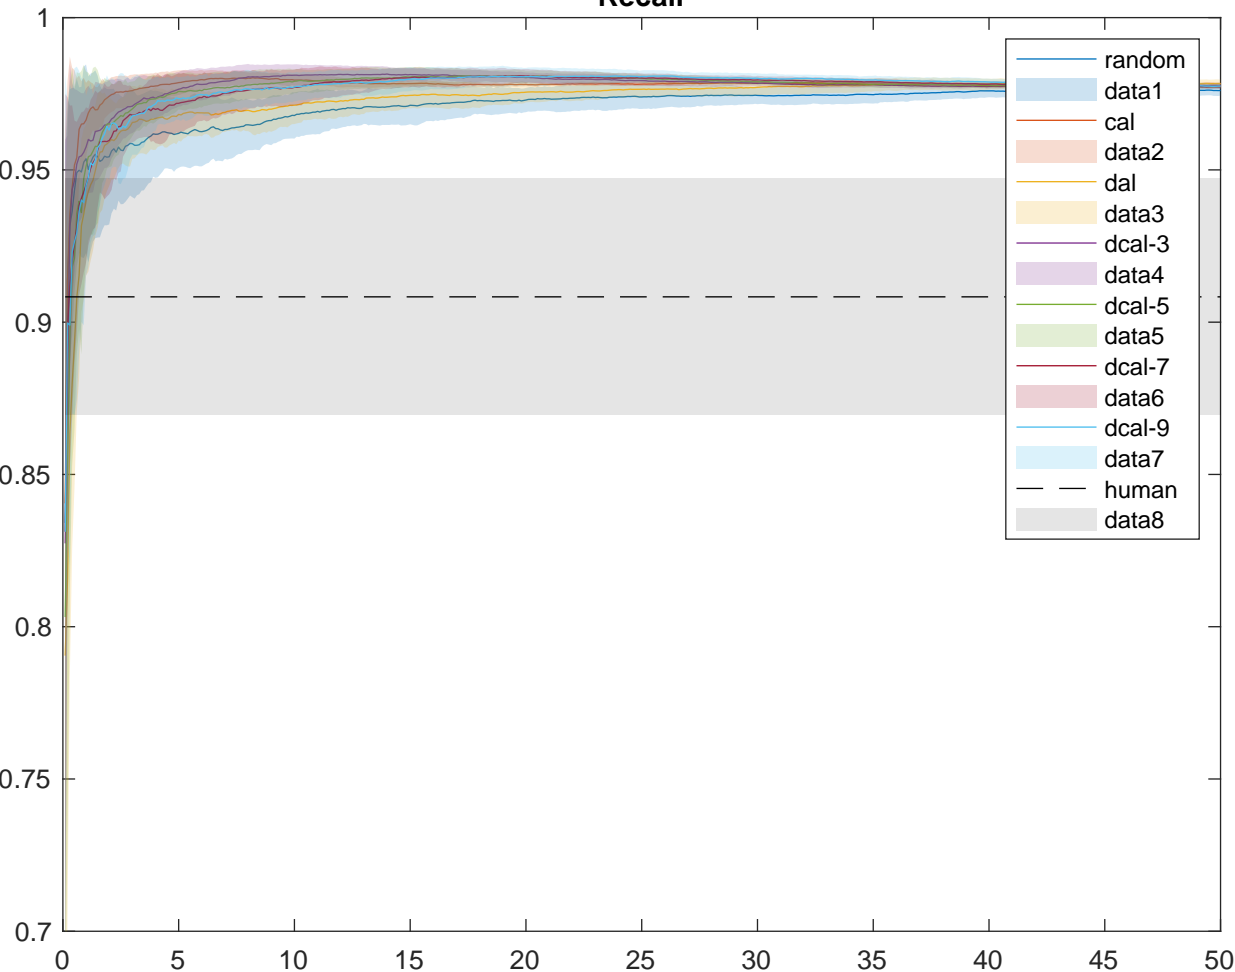

Supplement: Supplementary file 25 [file 90080022263cddafddd4a0726f1fb186-Supplemental-Conference.zip]

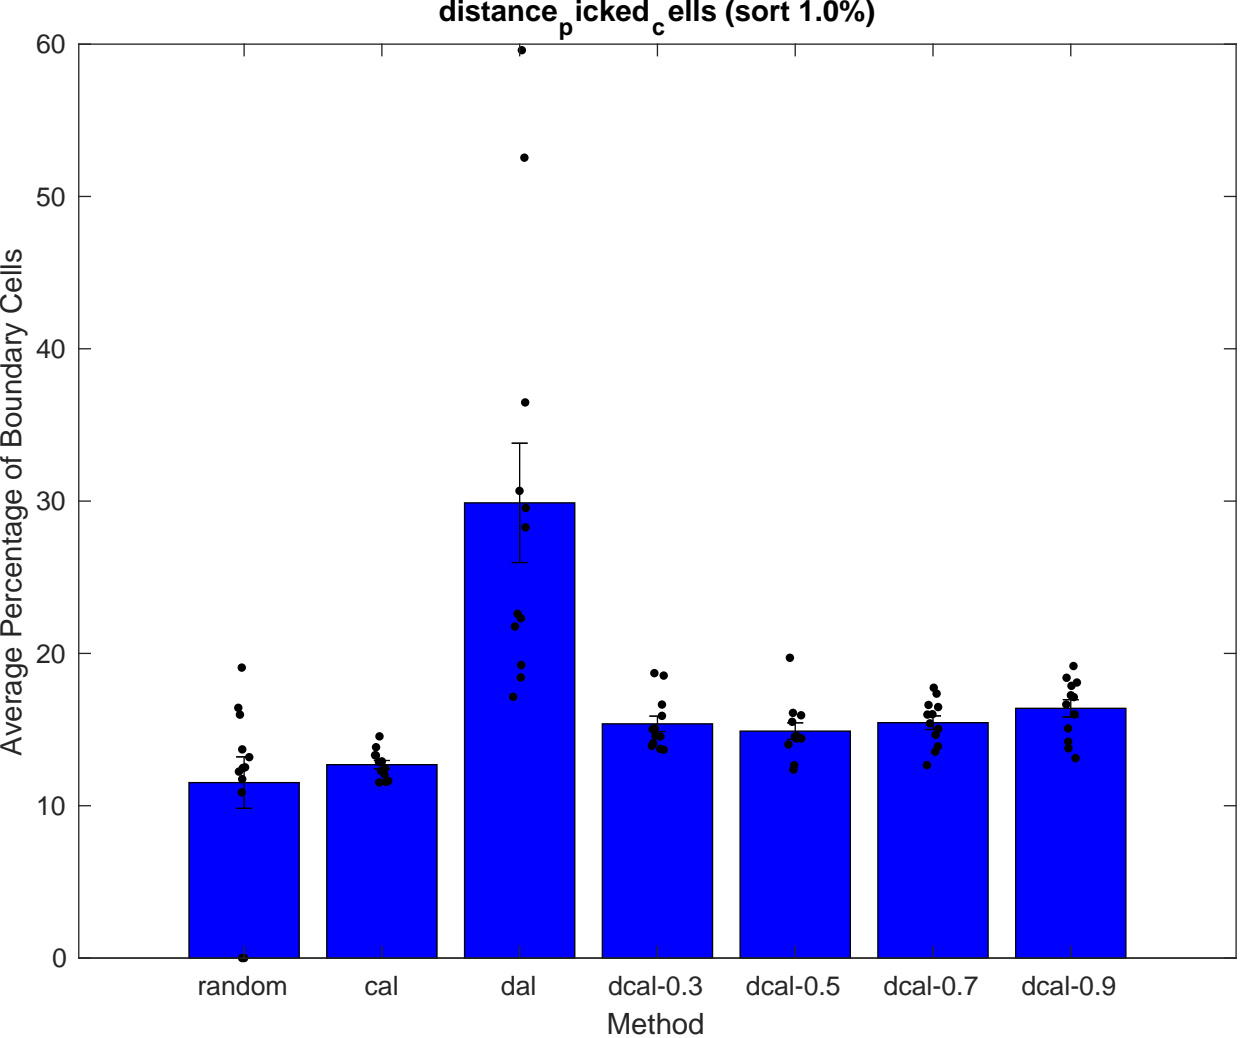

Supplement: Supplementary file 26 [file 90080022263cddafddd4a0726f1fb186-Supplemental-Conference.zip]

**F-score**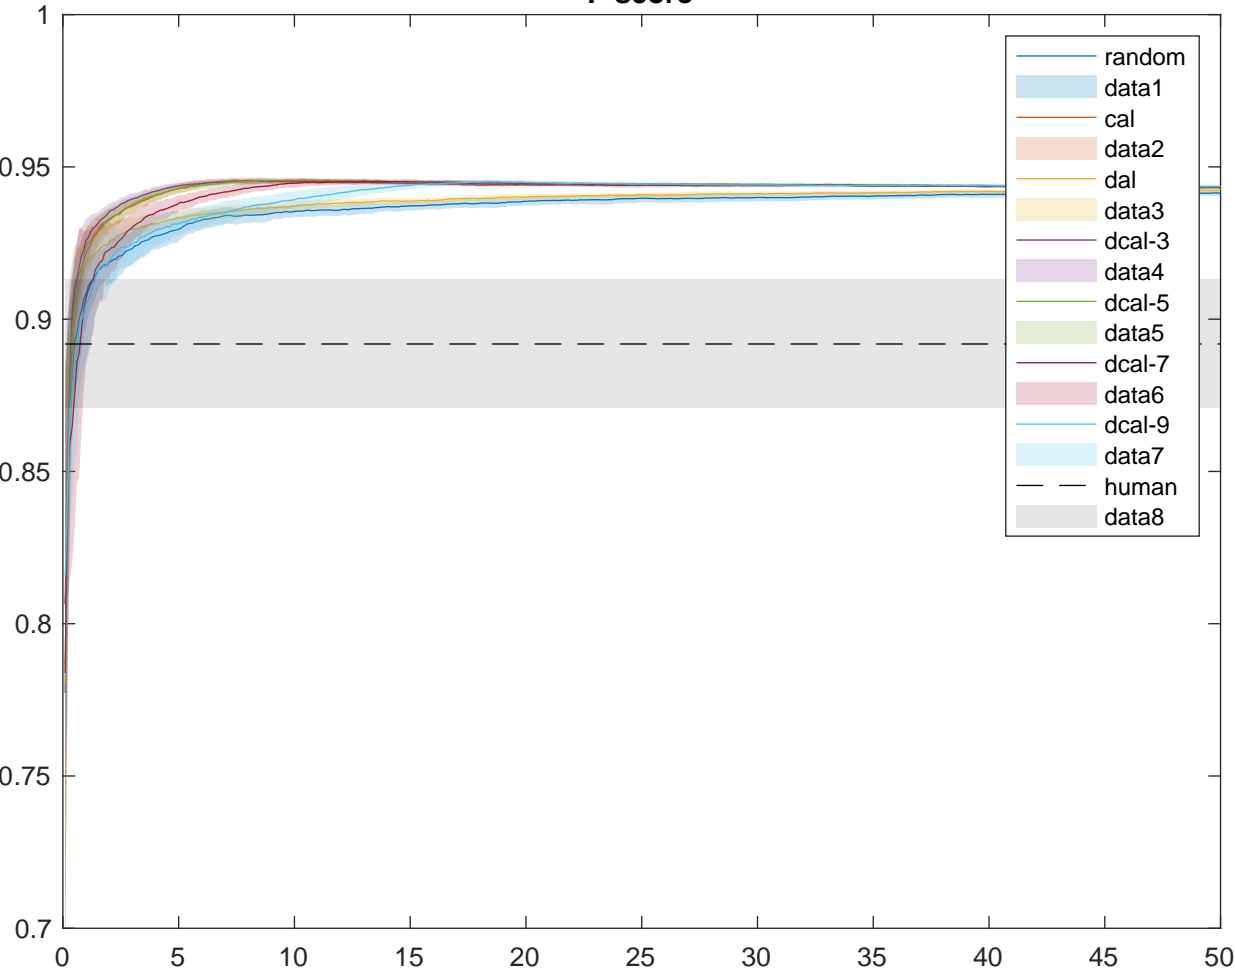

Supplement: Supplementary file 27 [file 90080022263cddafddd4a0726f1fb186-Supplemental-Conference.zip]

True Negative Rate-50

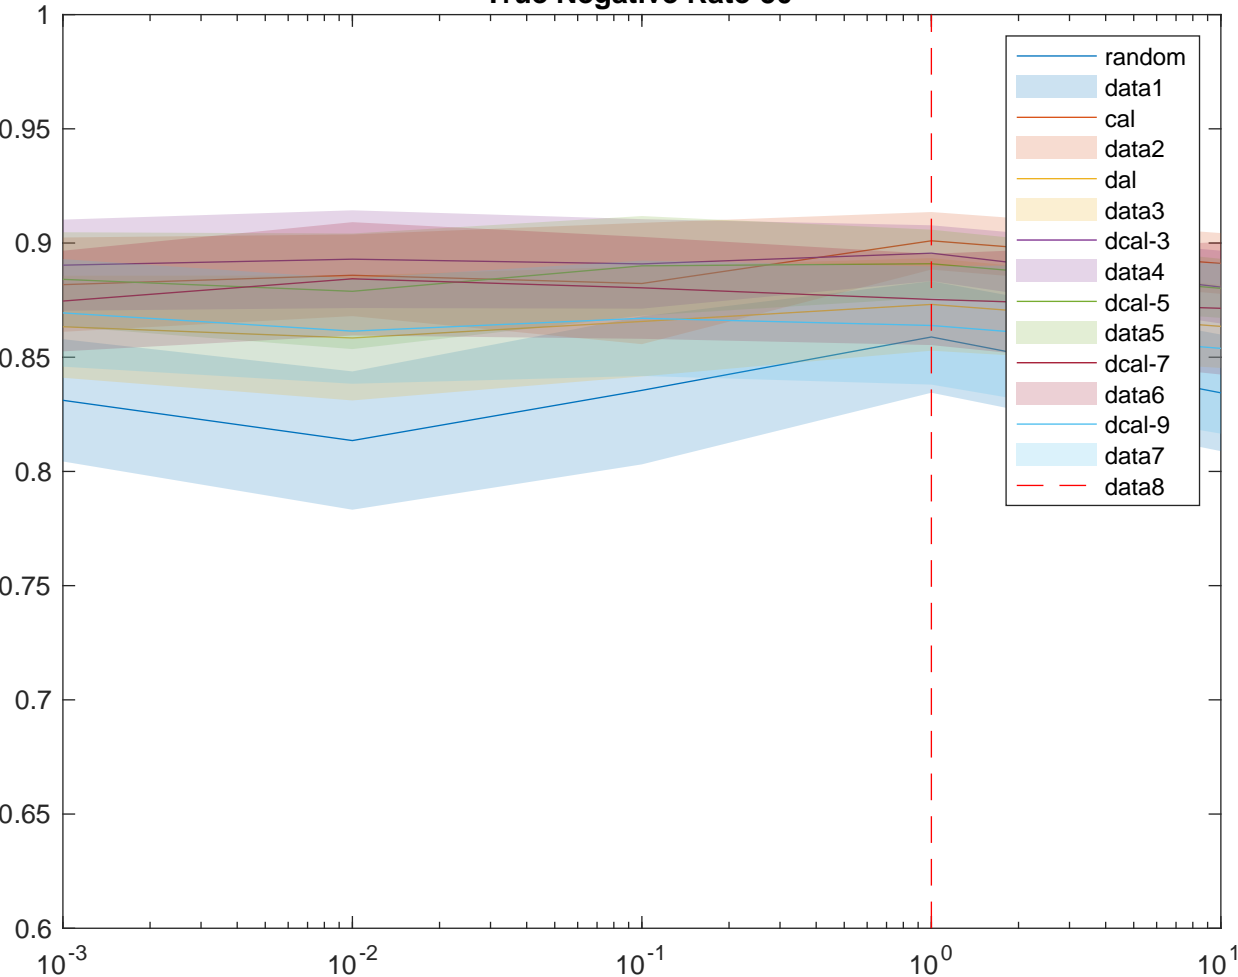

Supplement: Supplementary file 28 [file 90080022263cddafddd4a0726f1fb186-Supplemental-Conference.zip]

percent<sub>2</sub> spicked<sub>a</sub> || (sort 1.0%)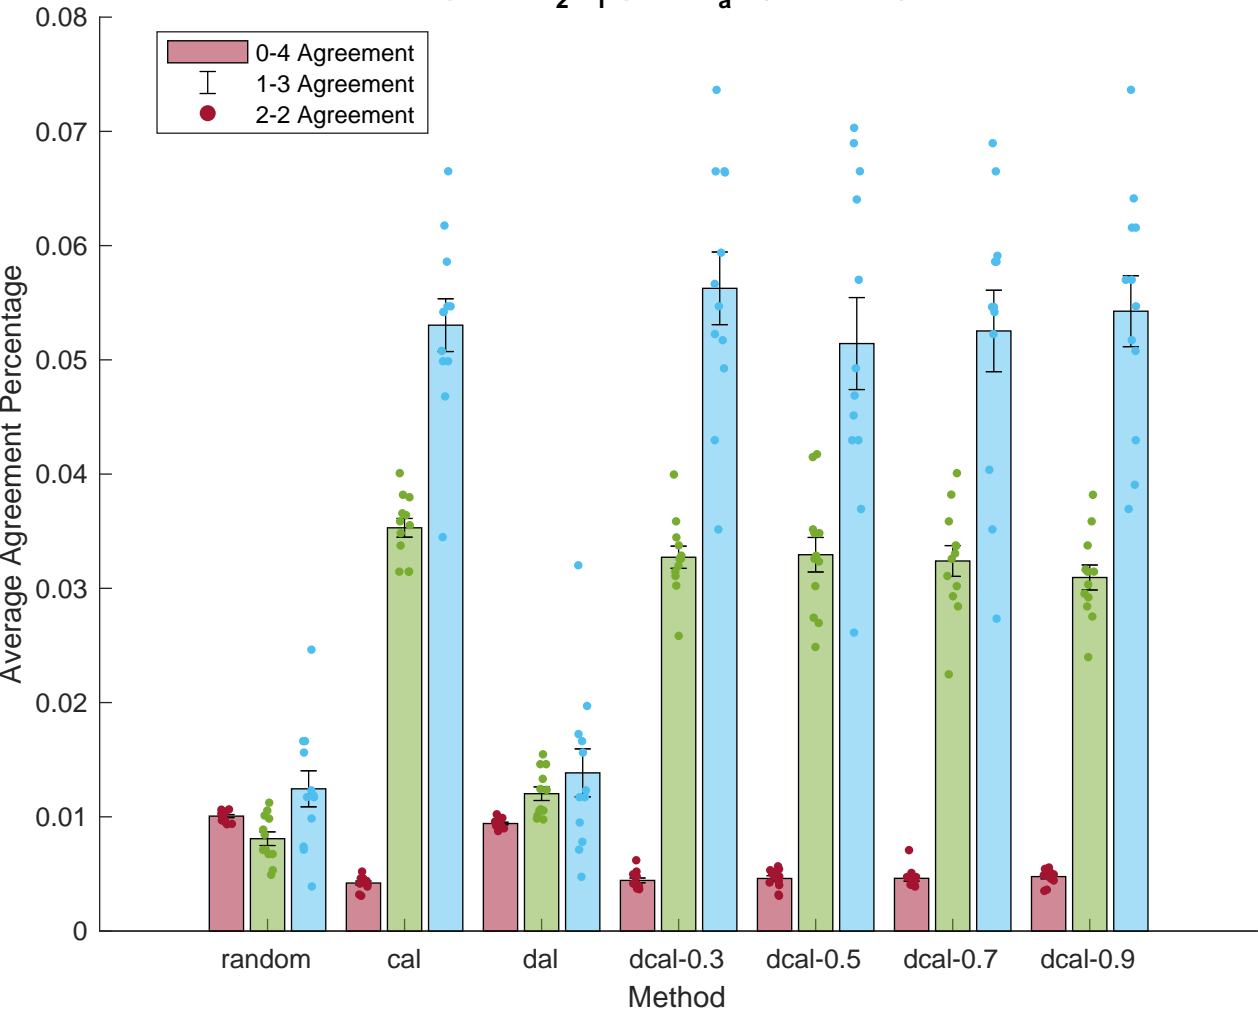

Supplement: Supplementary file 29 [file 90080022263cddafddd4a0726f1fb186-Supplemental-Conference.zip]

True Positive Rate

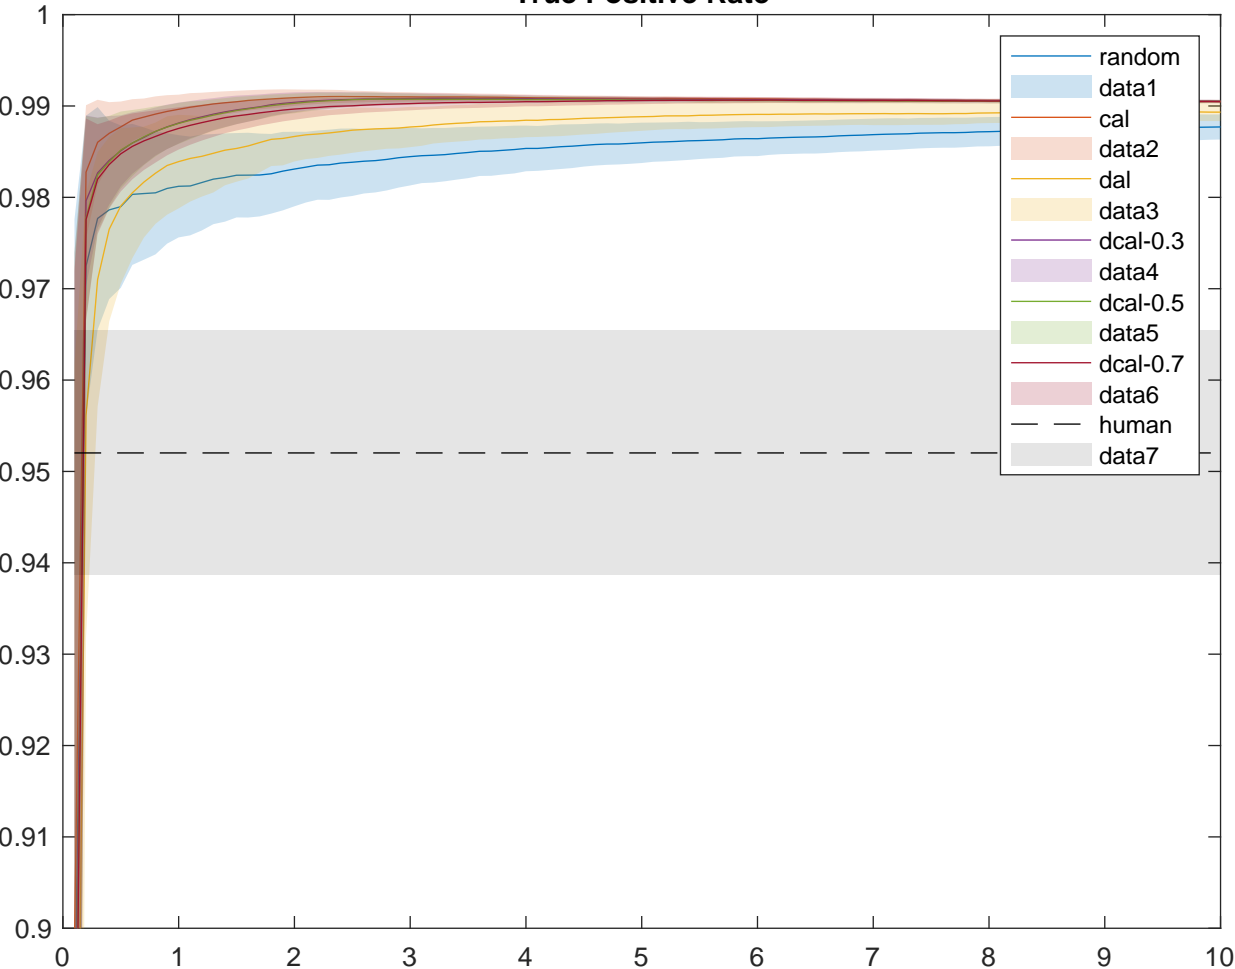

Supplement: Supplementary file 30 [file 90080022263cddafddd4a0726f1fb186-Supplemental-Conference.zip]

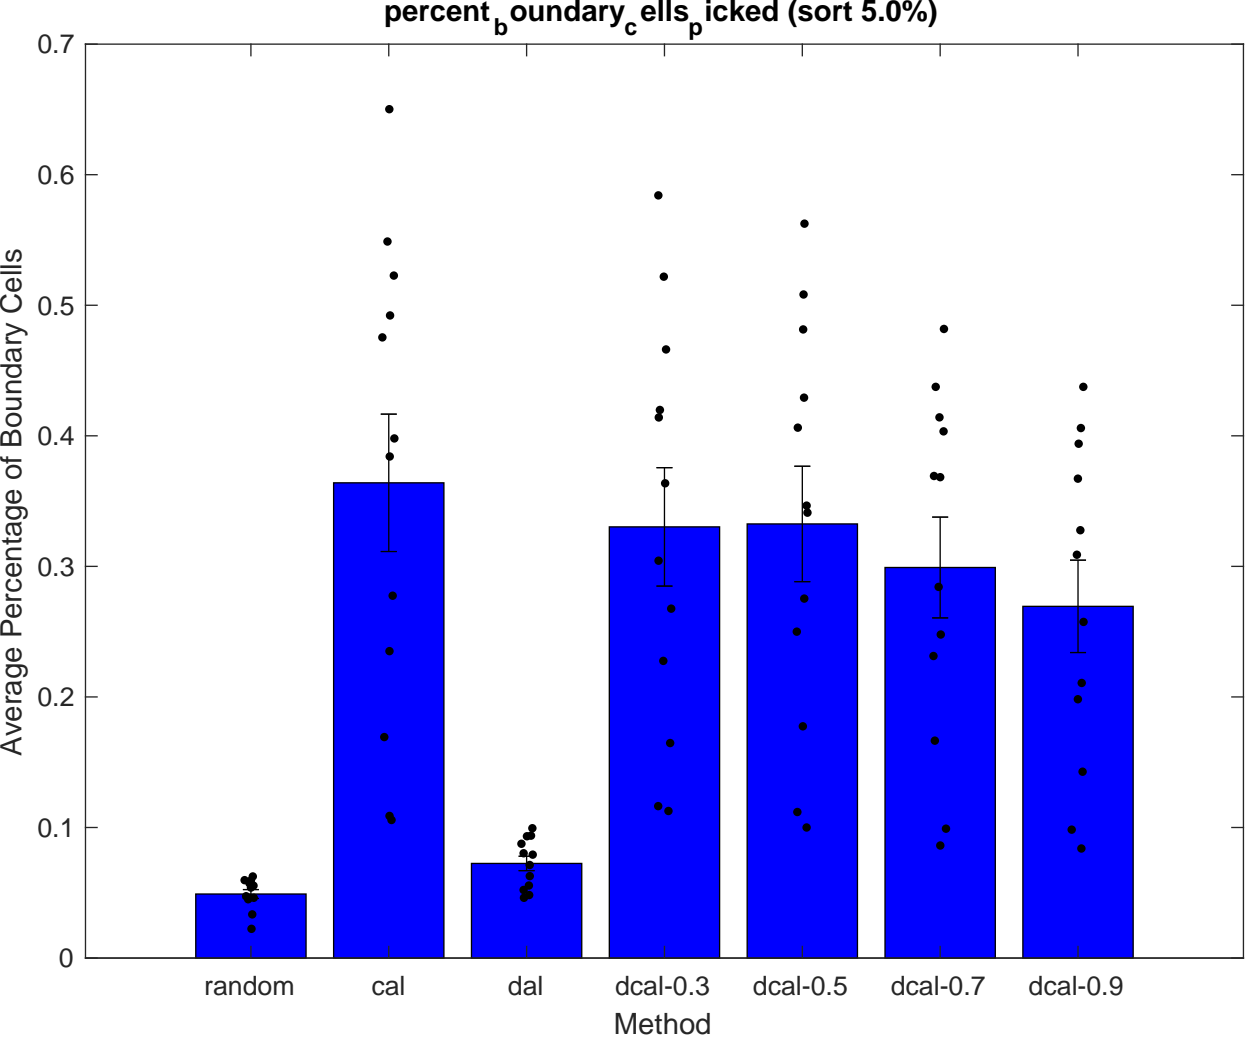

Supplement: Supplementary file 31 [file 90080022263cddafddd4a0726f1fb186-Supplemental-Conference.zip]

True Negative Rate

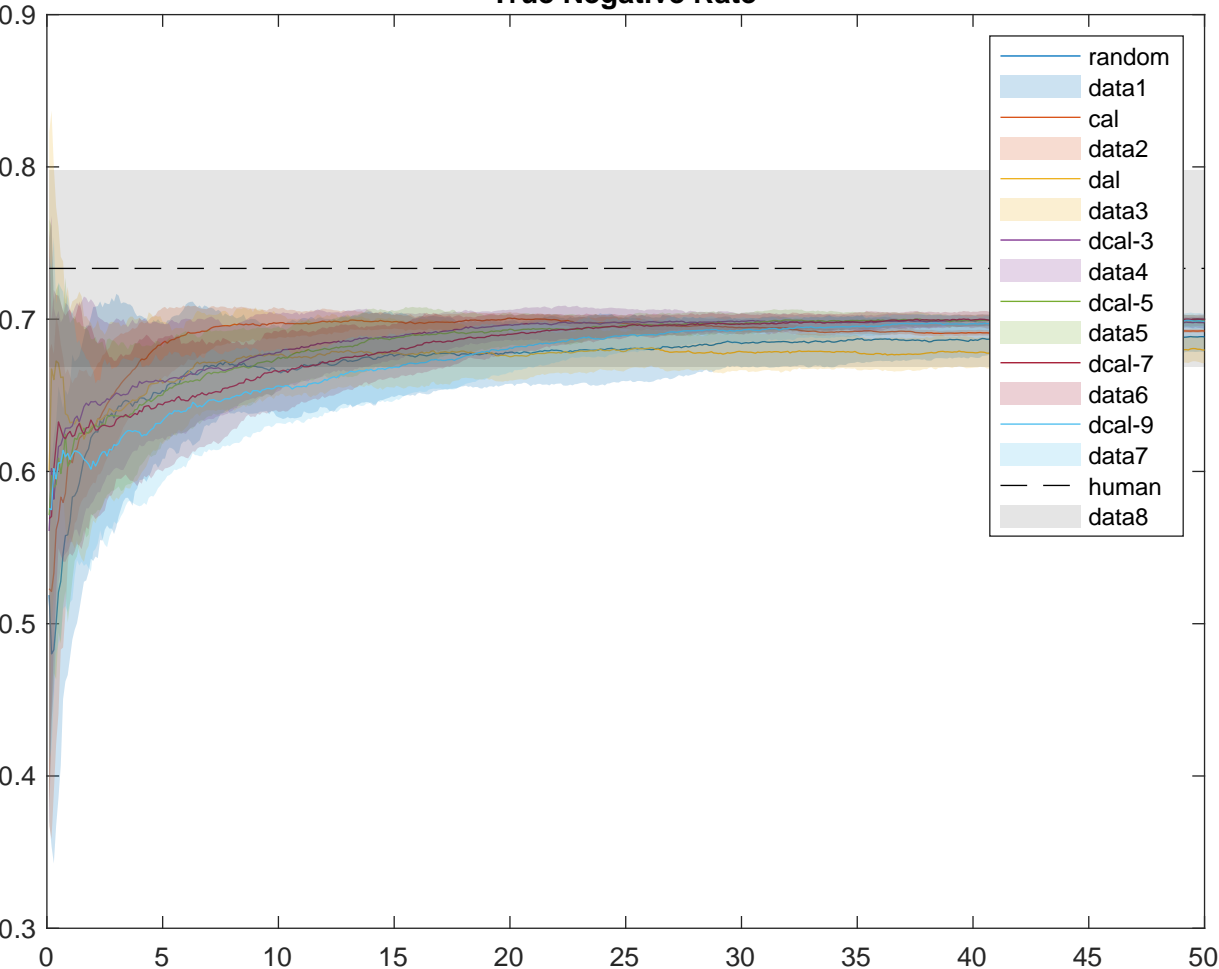

Supplement: Supplementary file 32 [file 90080022263cddafddd4a0726f1fb186-Supplemental-Conference.zip]

percent picked<sub>i</sub>s2-2<sub>a</sub>ll (sort 10.0%)

Average Agreement Percentage

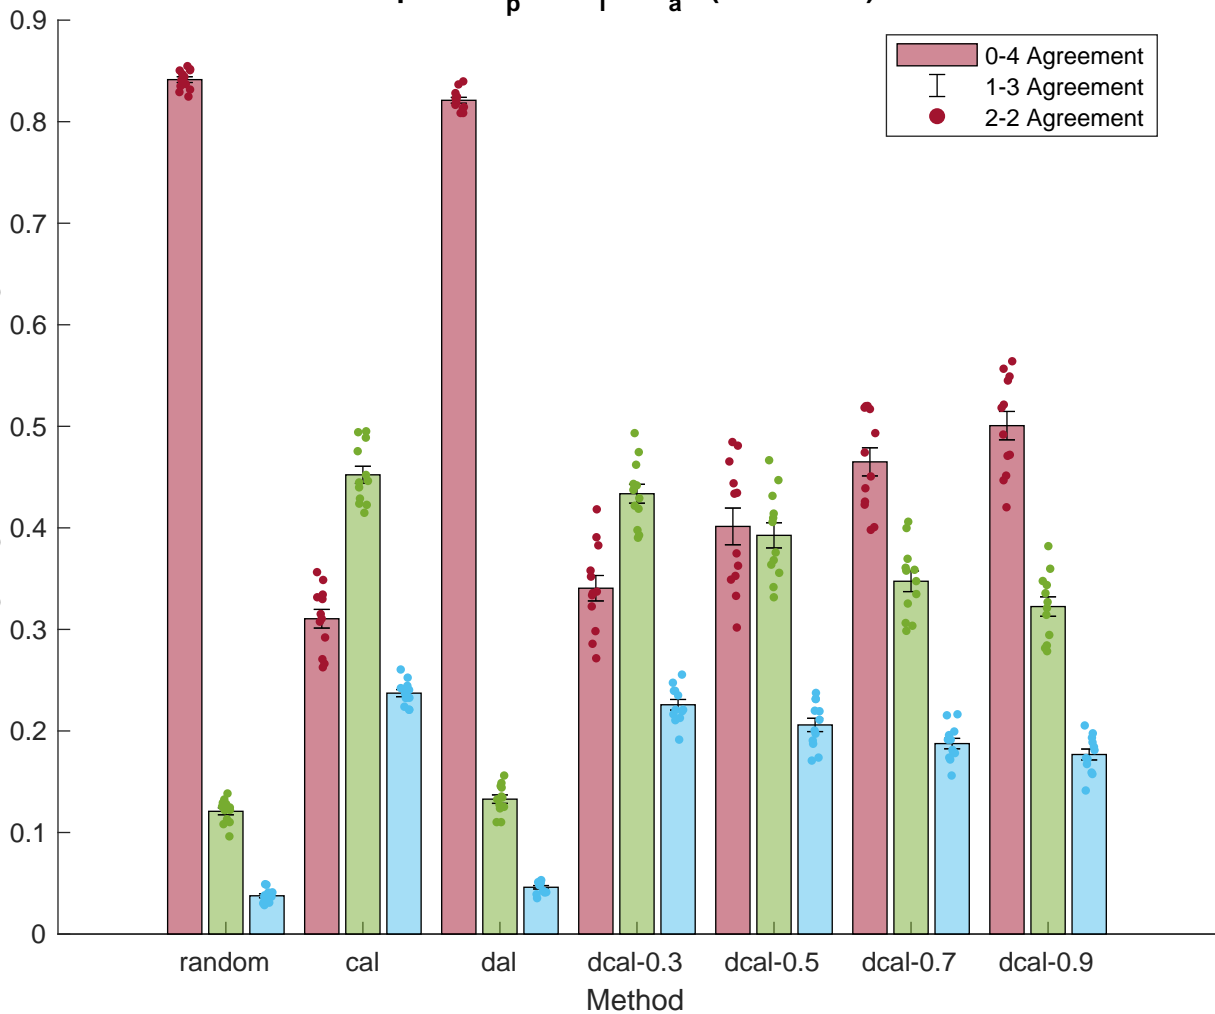

Supplement: Supplementary file 33 [file 90080022263cddafddd4a0726f1fb186-Supplemental-Conference.zip]

Accuracy

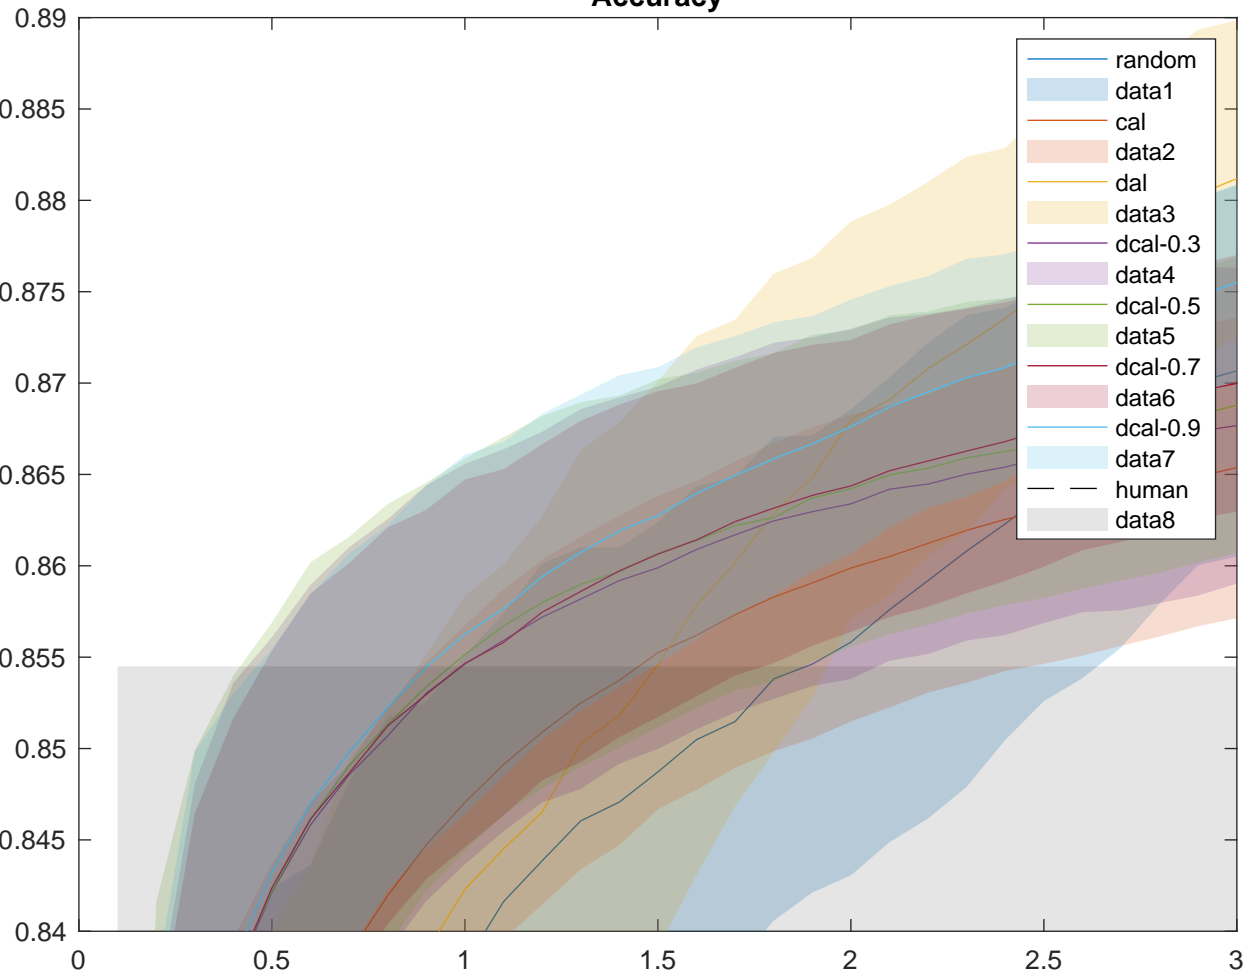

Supplement: Supplementary file 34 [file 90080022263cddafddd4a0726f1fb186-Supplemental-Conference.zip]

percent picked<sub>i</sub>s2-2<sub>a</sub> || (sort 5.0%)

Average Agreement Percentage

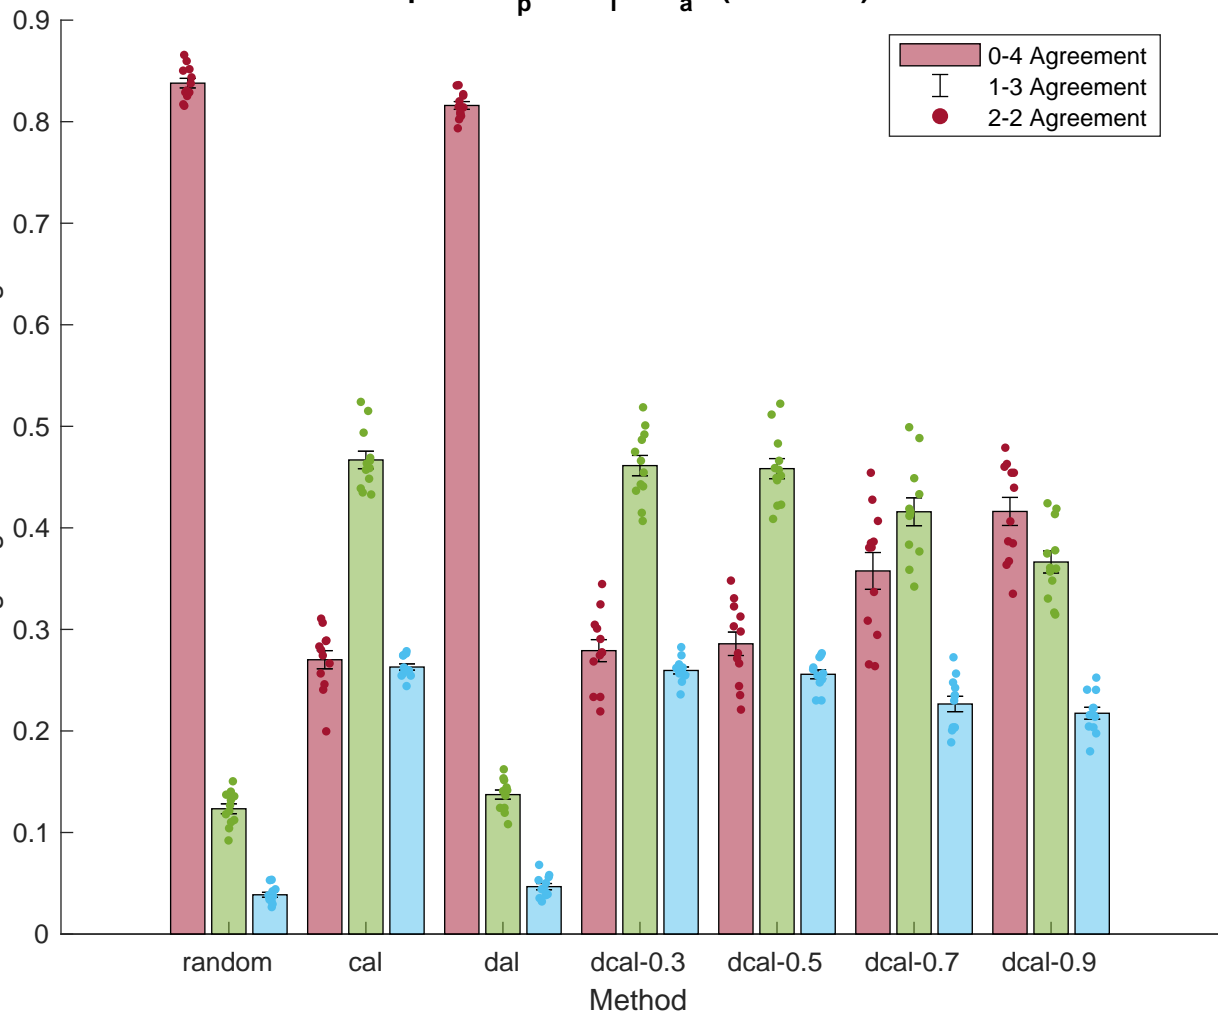

Supplement: Supplementary file 35 [file 90080022263cddafddd4a0726f1fb186-Supplemental-Conference.zip]

Recall

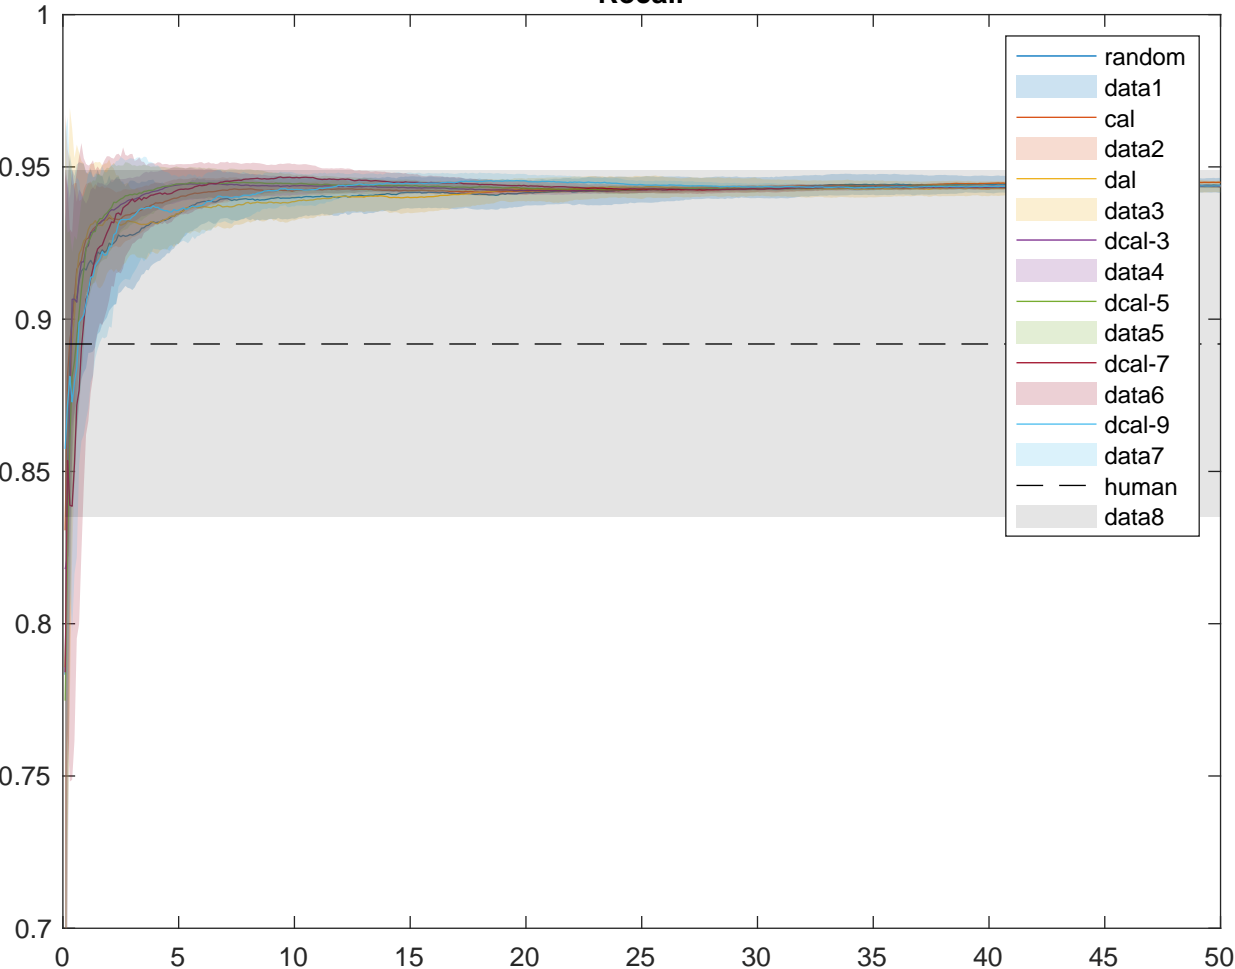

Supplement: Supplementary file 36 [file 90080022263cddafddd4a0726f1fb186-Supplemental-Conference.zip]

percent<sub>2-2</sub>spick<sub>a</sub>ll (sort 10.0%)

Average Agreement Percentage

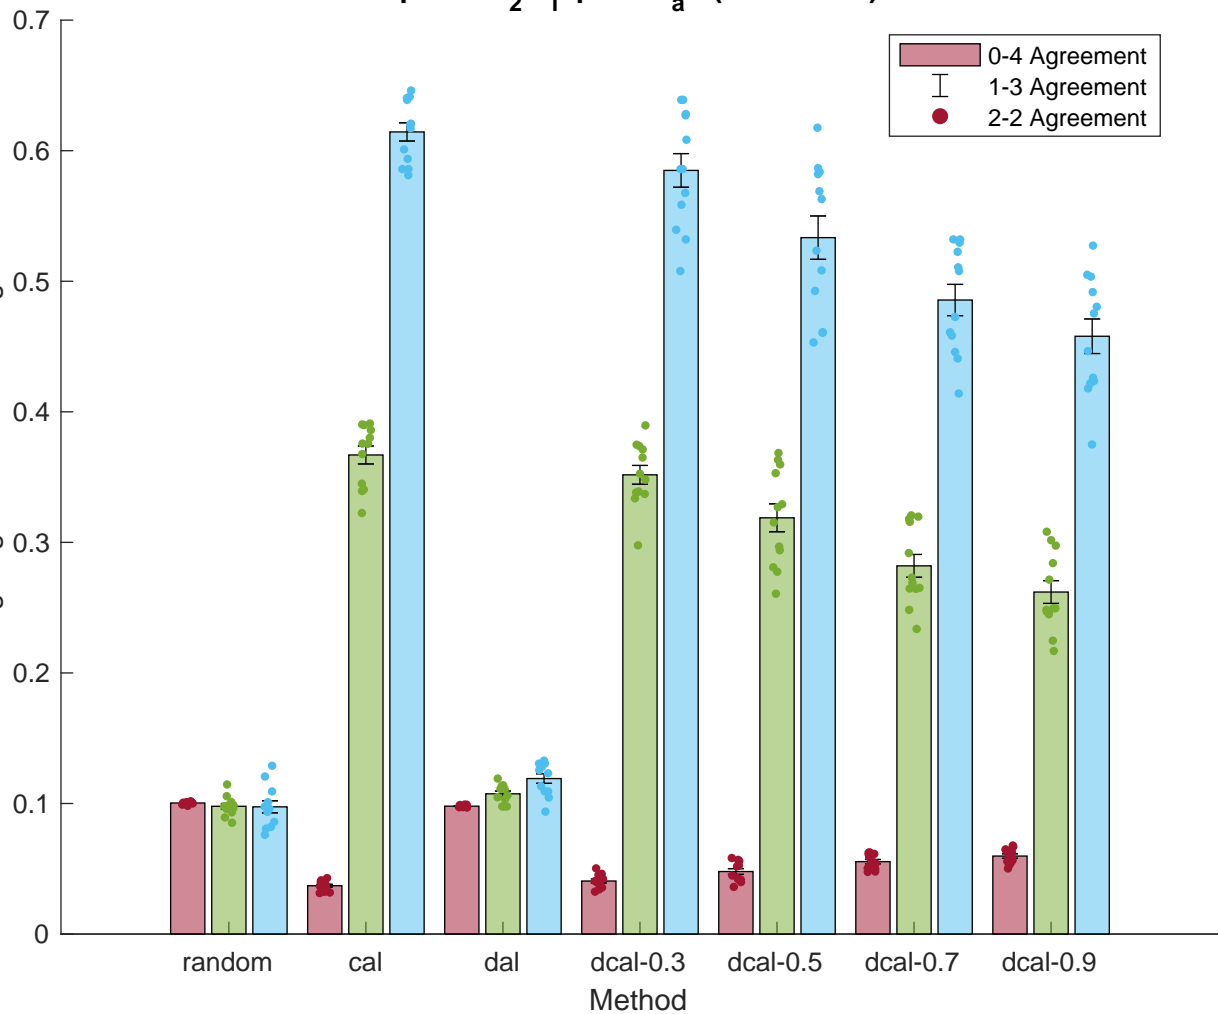

Supplement: Supplementary file 37 [file 90080022263cddafddd4a0726f1fb186-Supplemental-Conference.zip]

True Positive Rate

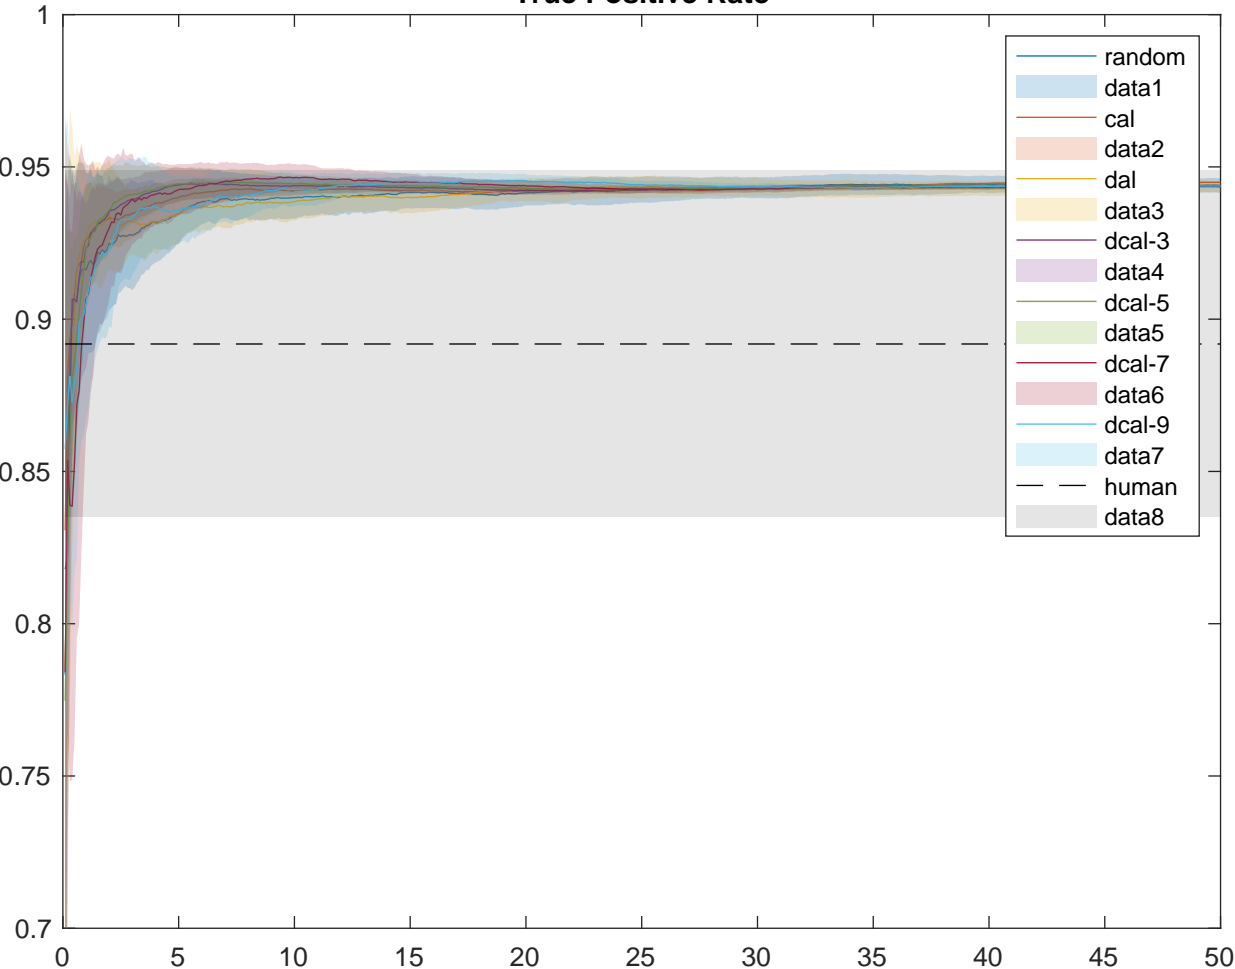

Supplement: Supplementary file 38 [file 90080022263cddafddd4a0726f1fb186-Supplemental-Conference.zip]

Precision

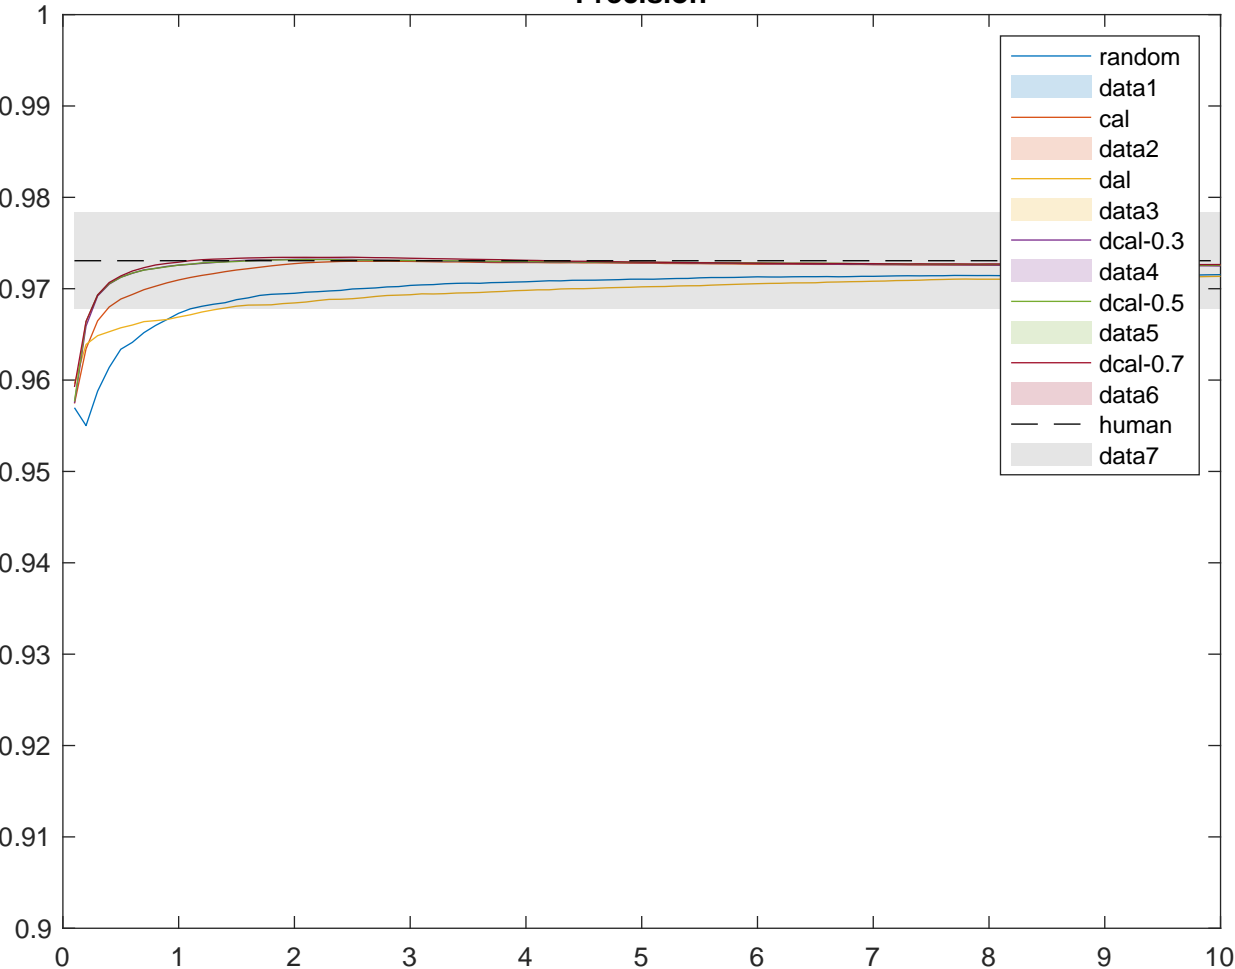

Supplement: Supplementary file 39 [file 90080022263cddafddd4a0726f1fb186-Supplemental-Conference.zip]

True Positive Rate

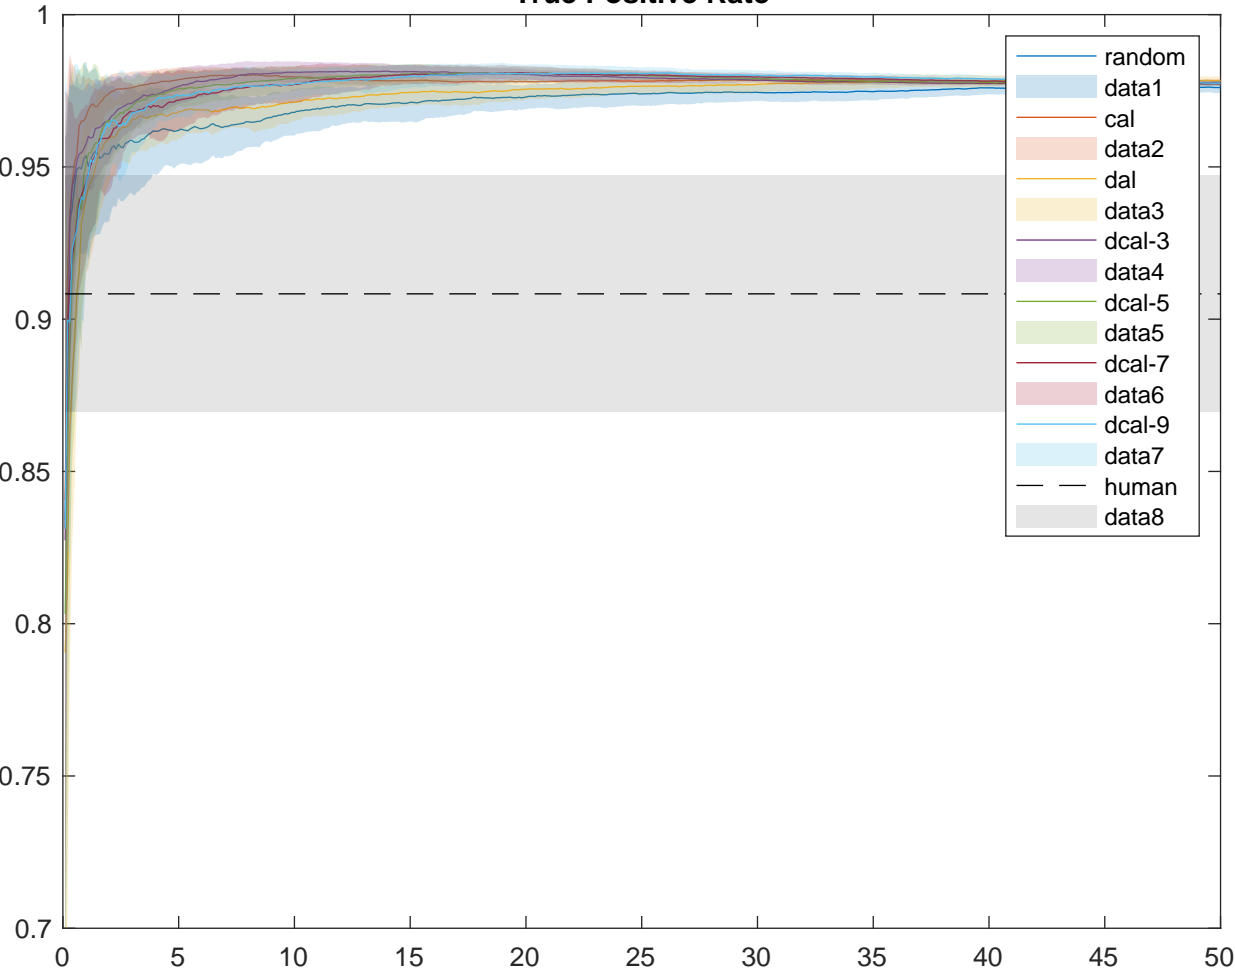

Supplement: Supplementary file 40 [file 90080022263cddafddd4a0726f1fb186-Supplemental-Conference.zip]

True Positive Rate

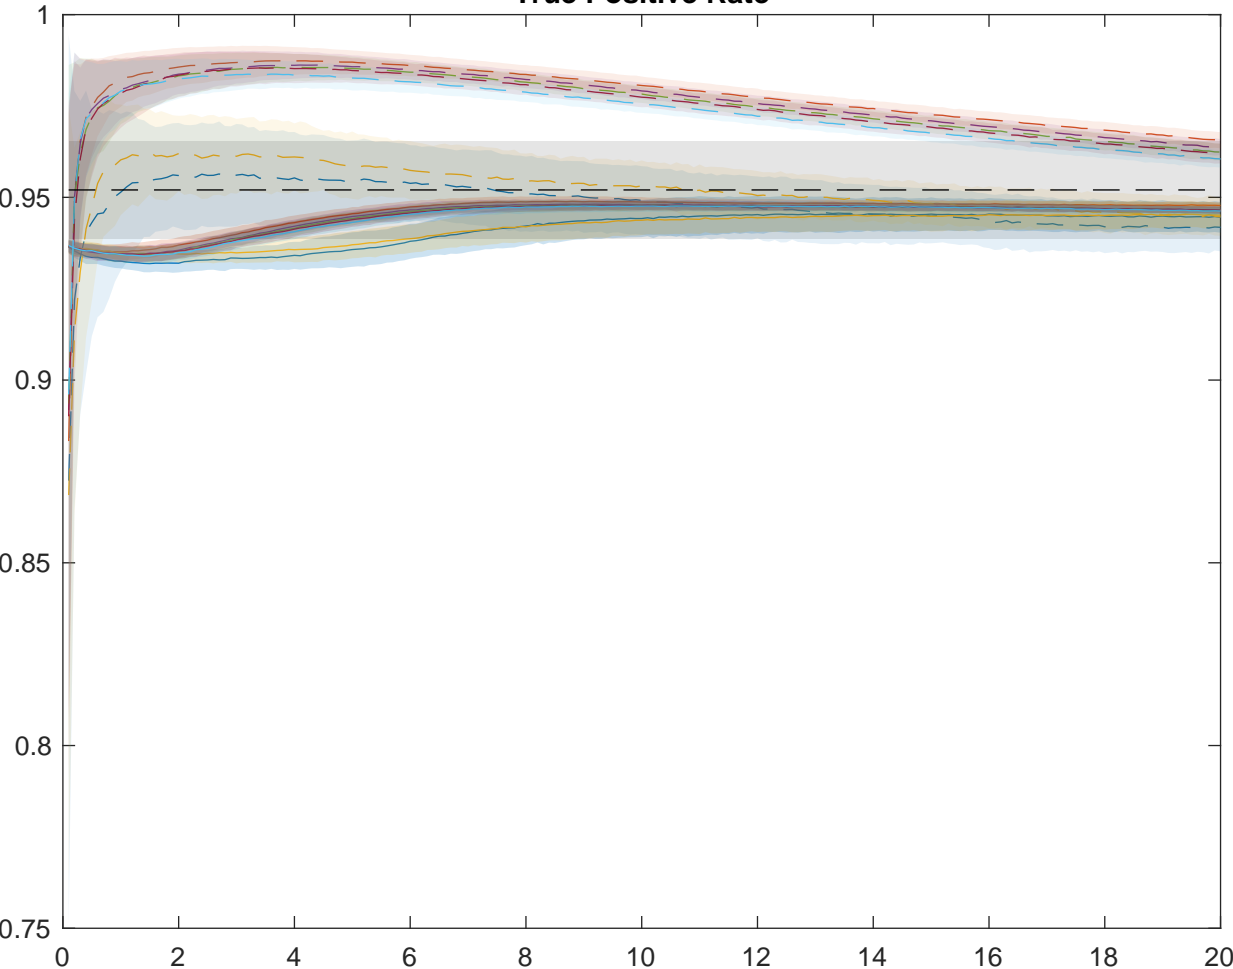

Supplement: Supplementary file 41 [file 90080022263cddafddd4a0726f1fb186-Supplemental-Conference.zip]

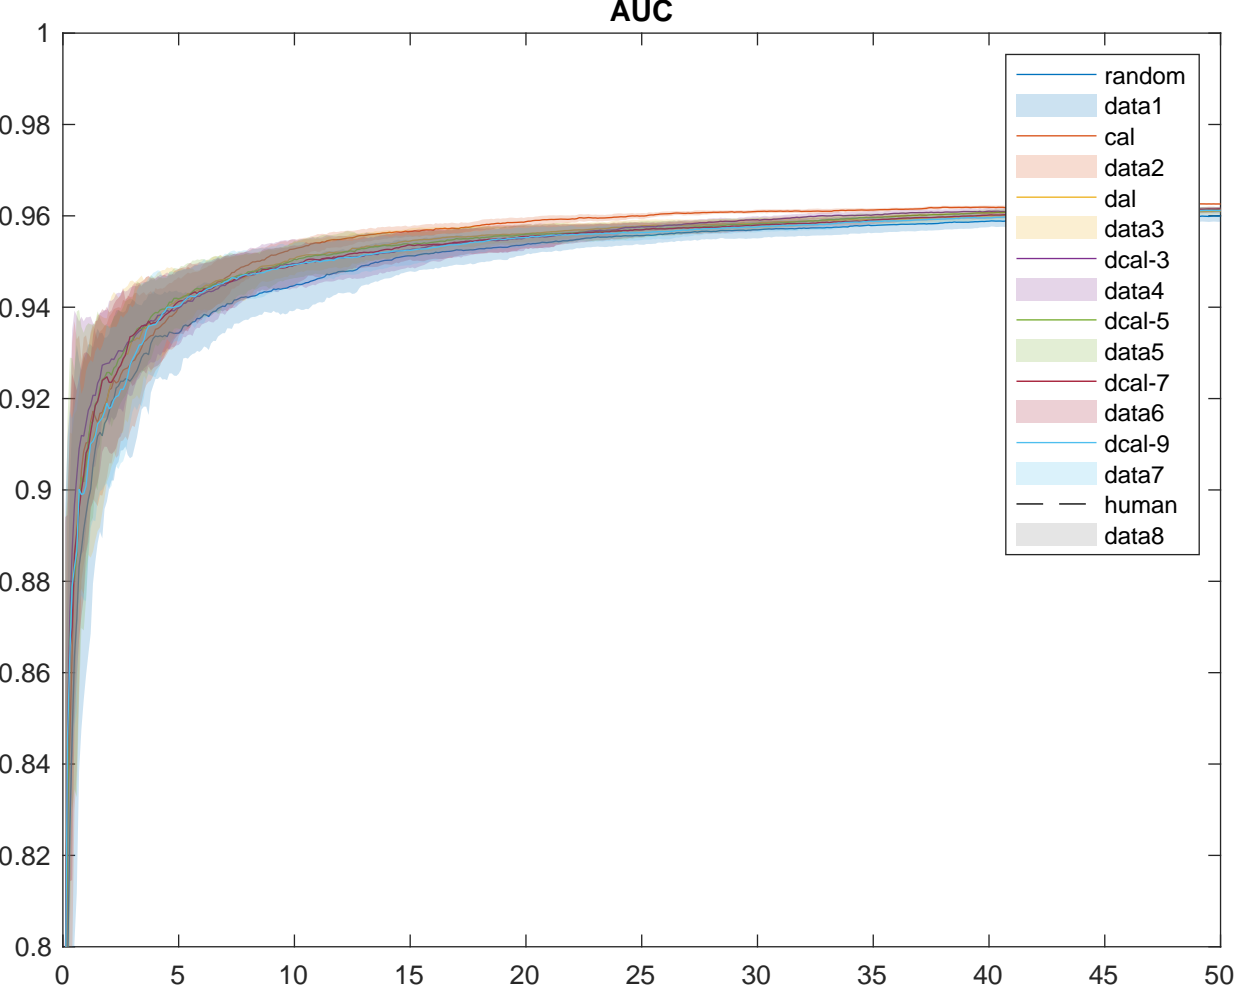

Supplement: Supplementary file 42 [file 90080022263cddafddd4a0726f1fb186-Supplemental-Conference.zip]

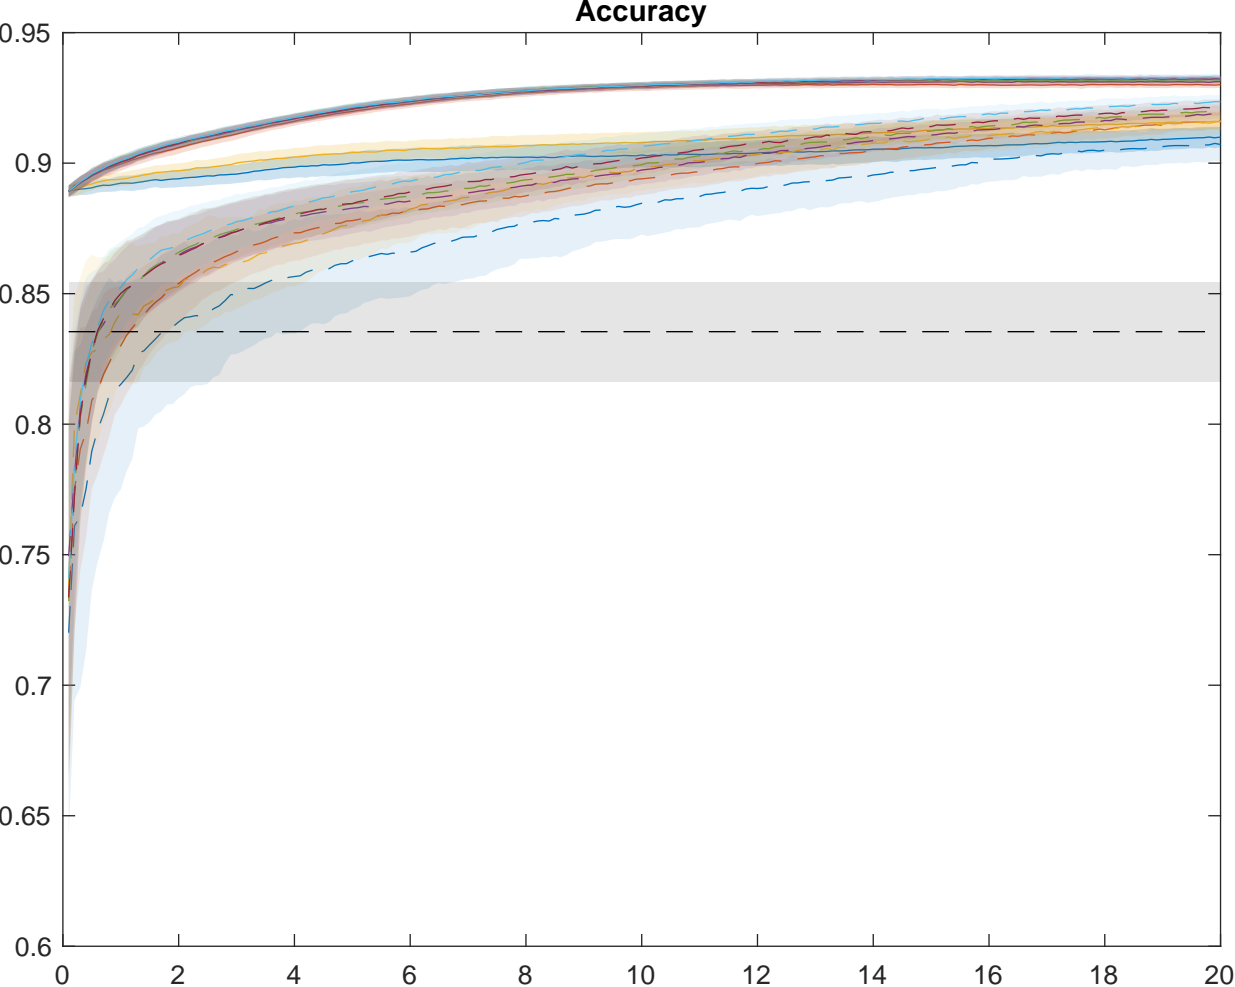

Supplement: Supplementary file 43 [file 90080022263cddafddd4a0726f1fb186-Supplemental-Conference.zip]

True Negative Rate

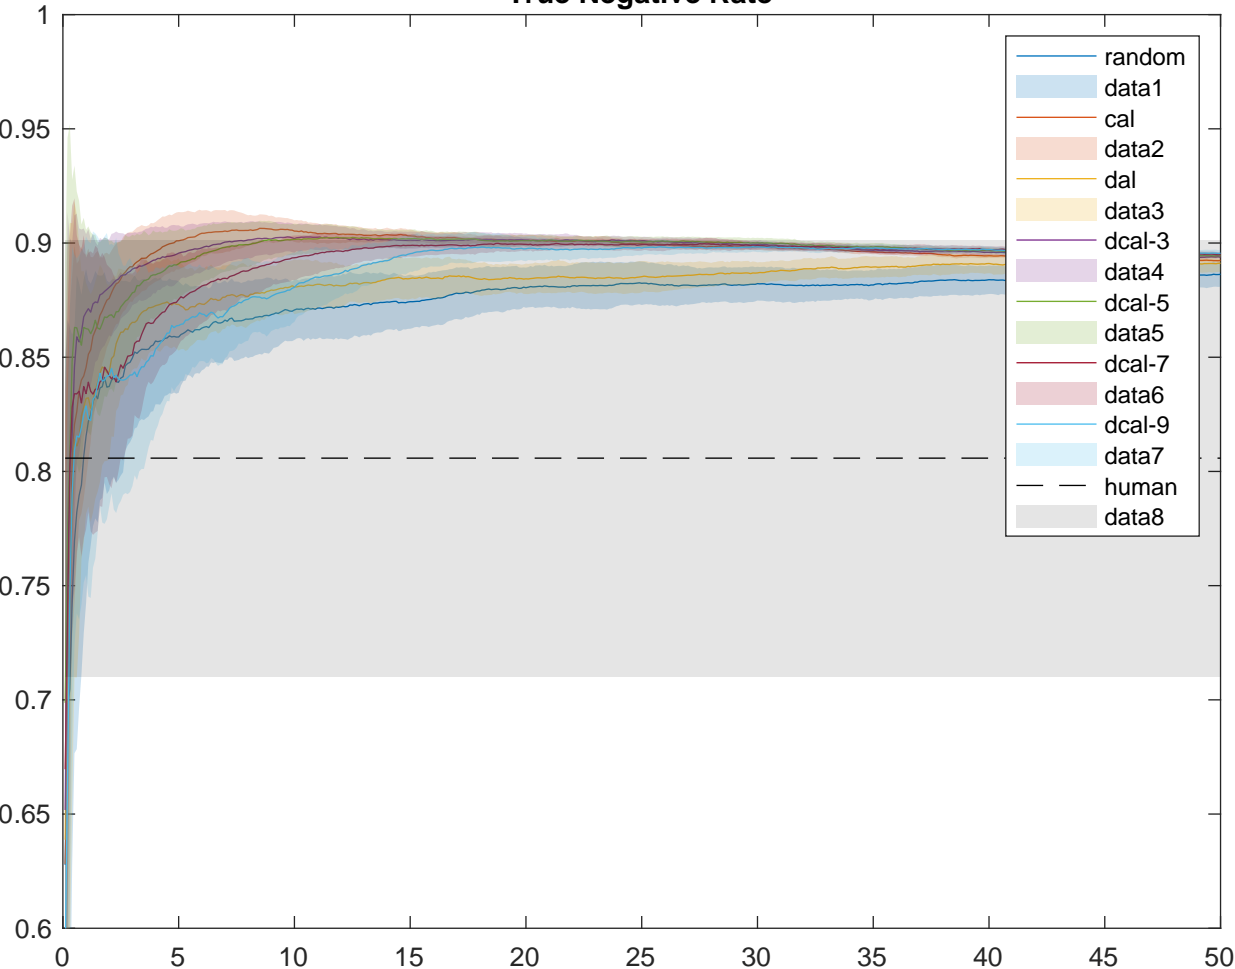

Supplement: Supplementary file 44 [file 90080022263cddafddd4a0726f1fb186-Supplemental-Conference.zip]

True Negative Rate

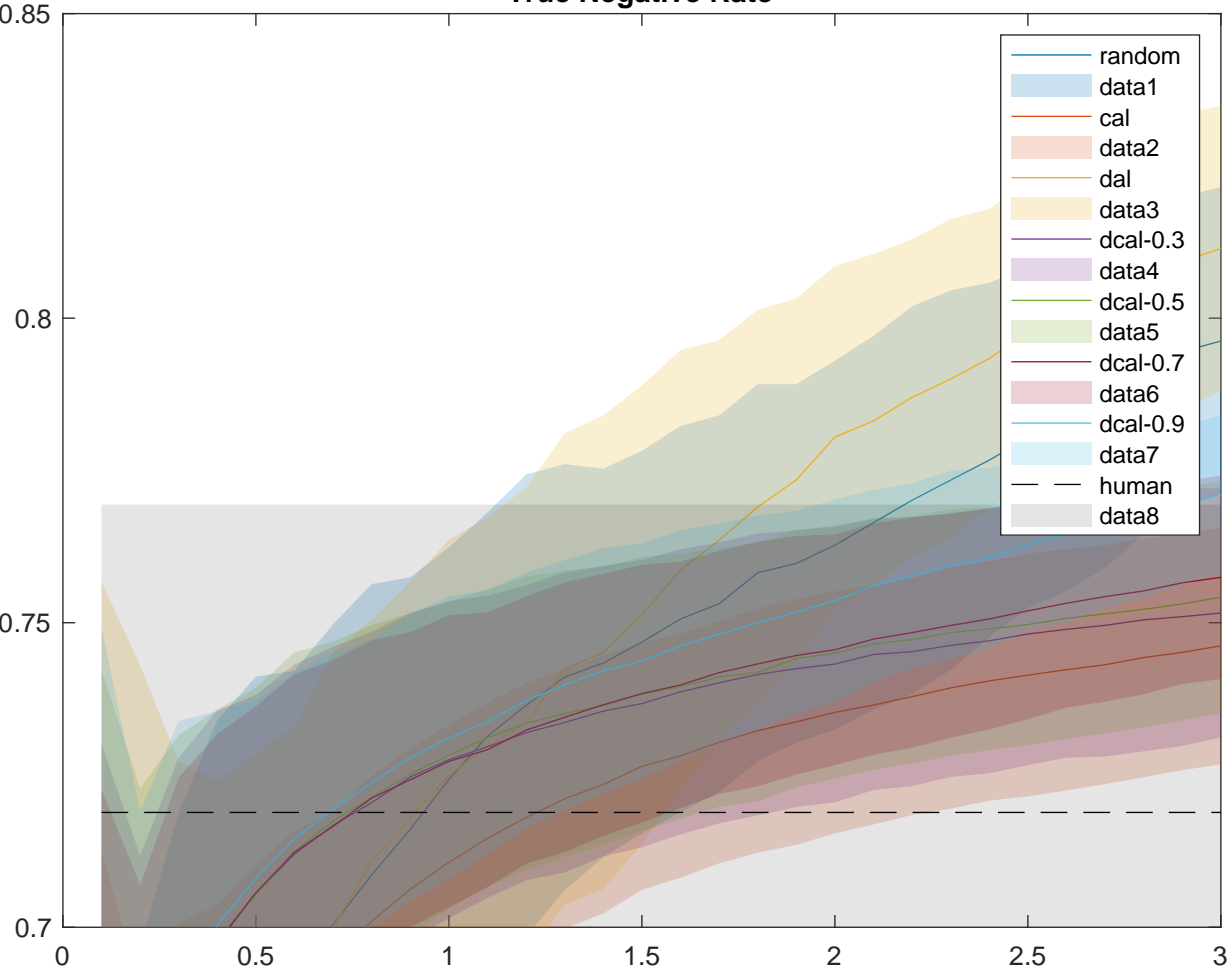

Supplement: Supplementary file 45 [file 90080022263cddafddd4a0726f1fb186-Supplemental-Conference.zip]

True Positive Rate-10

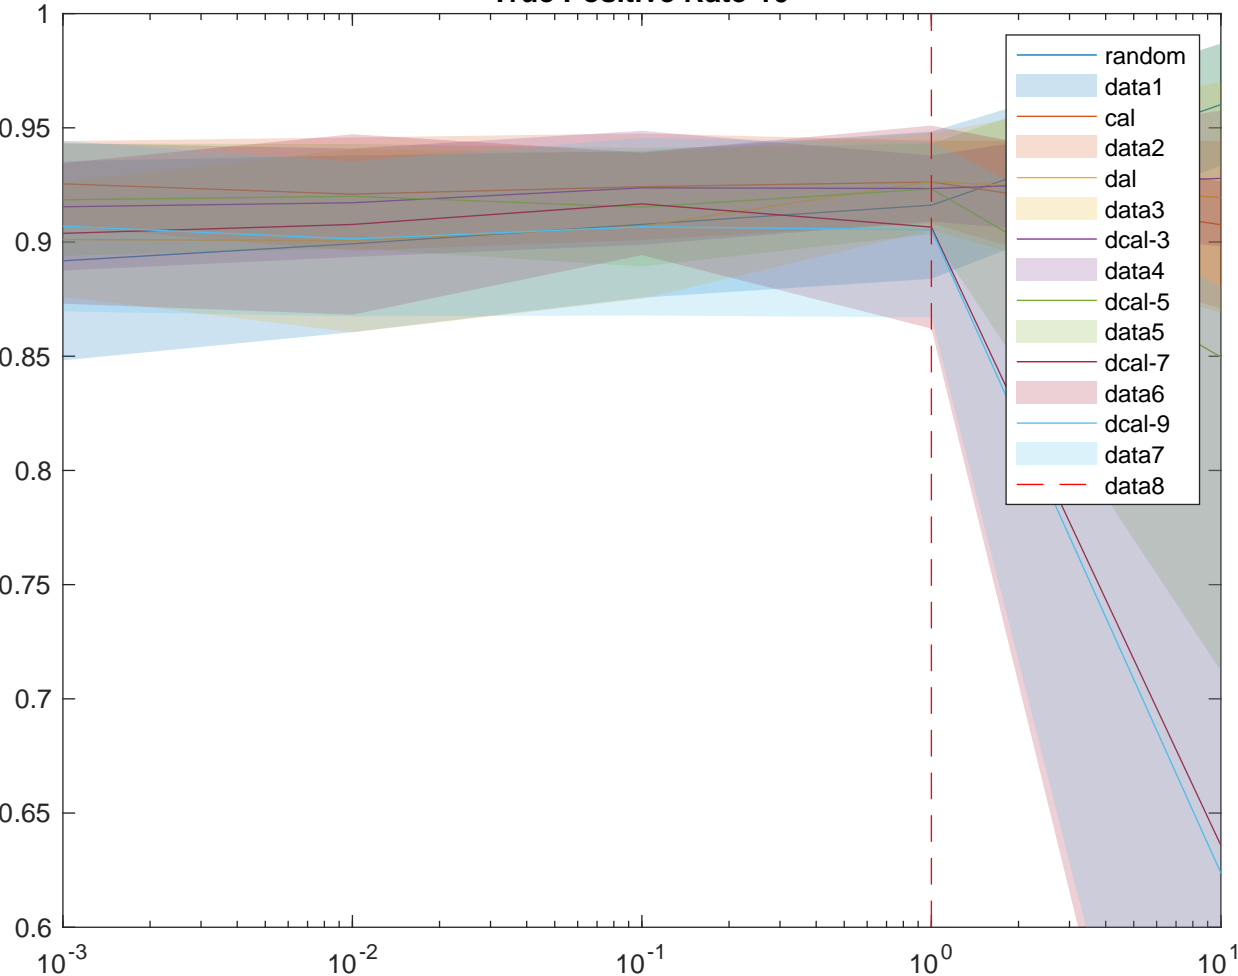

Supplement: Supplementary file 46 [file 90080022263cddafddd4a0726f1fb186-Supplemental-Conference.zip]

distance picked cells (sort 3.0%)

Average Percentage of Boundary Cells

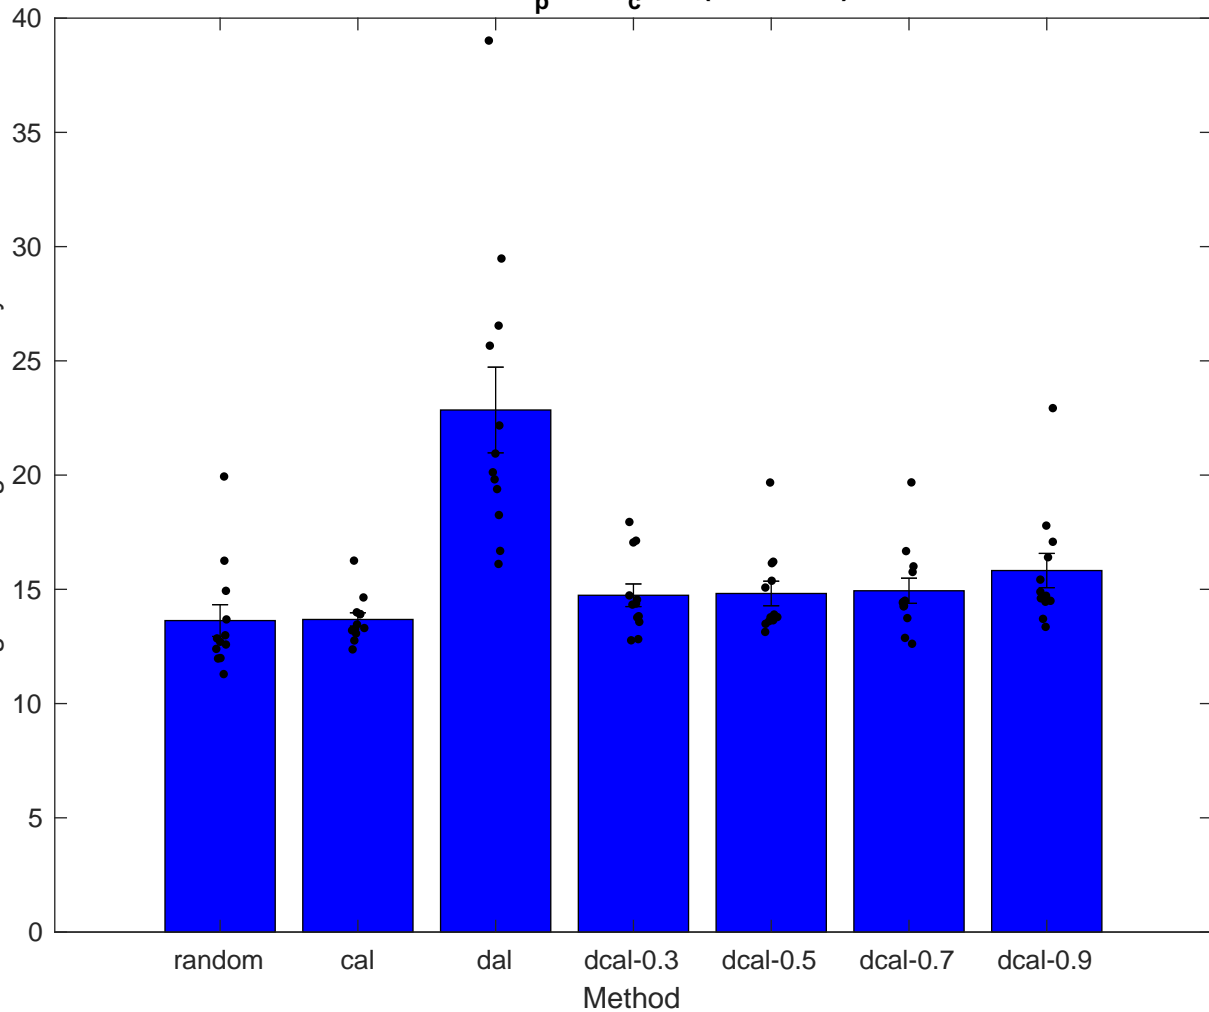

Supplement: Supplementary file 47 [file 90080022263cddafddd4a0726f1fb186-Supplemental-Conference.zip]

## AUC

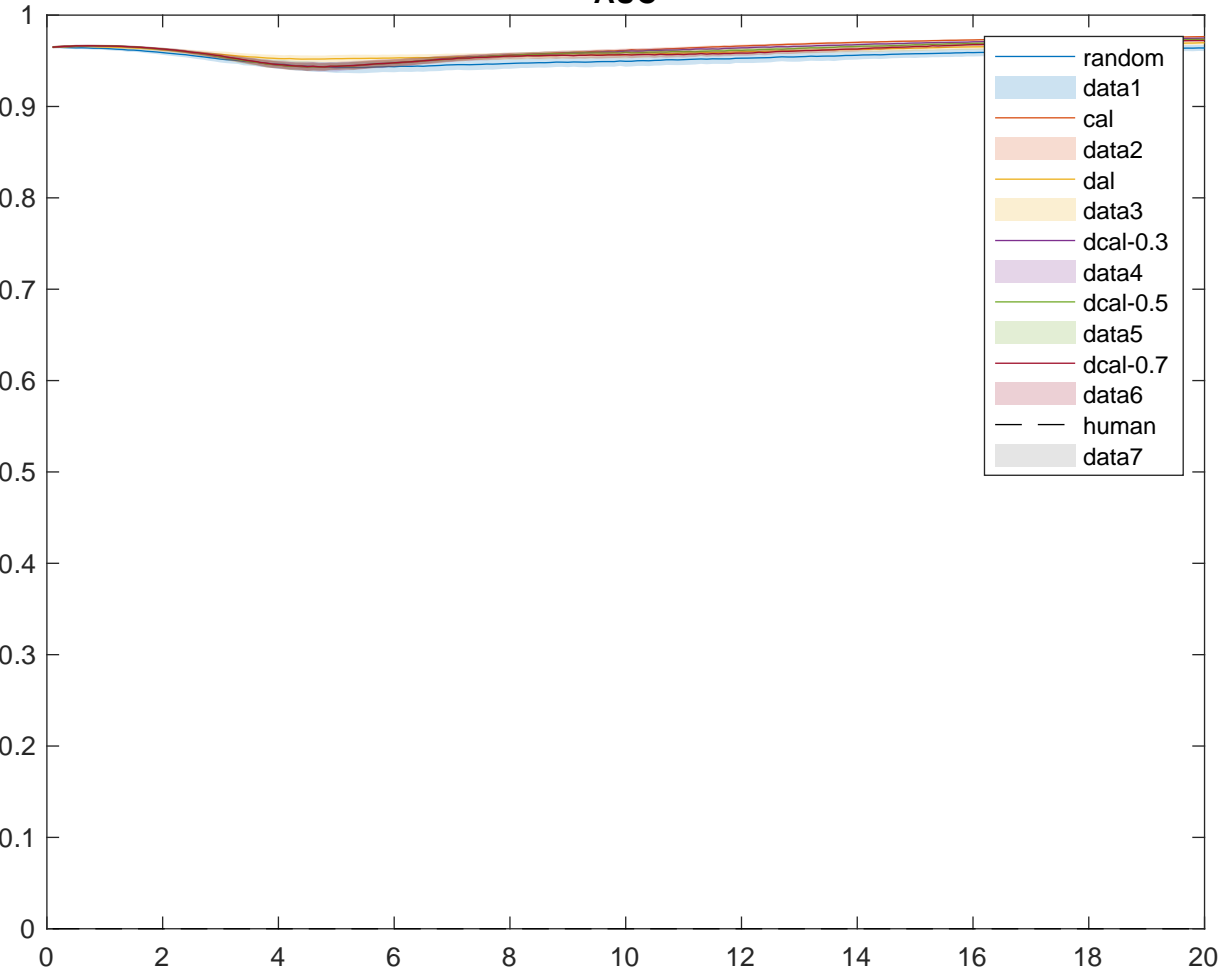

Supplement: Supplementary file 48 [file 90080022263cddafddd4a0726f1fb186-Supplemental-Conference.zip]

**F-score**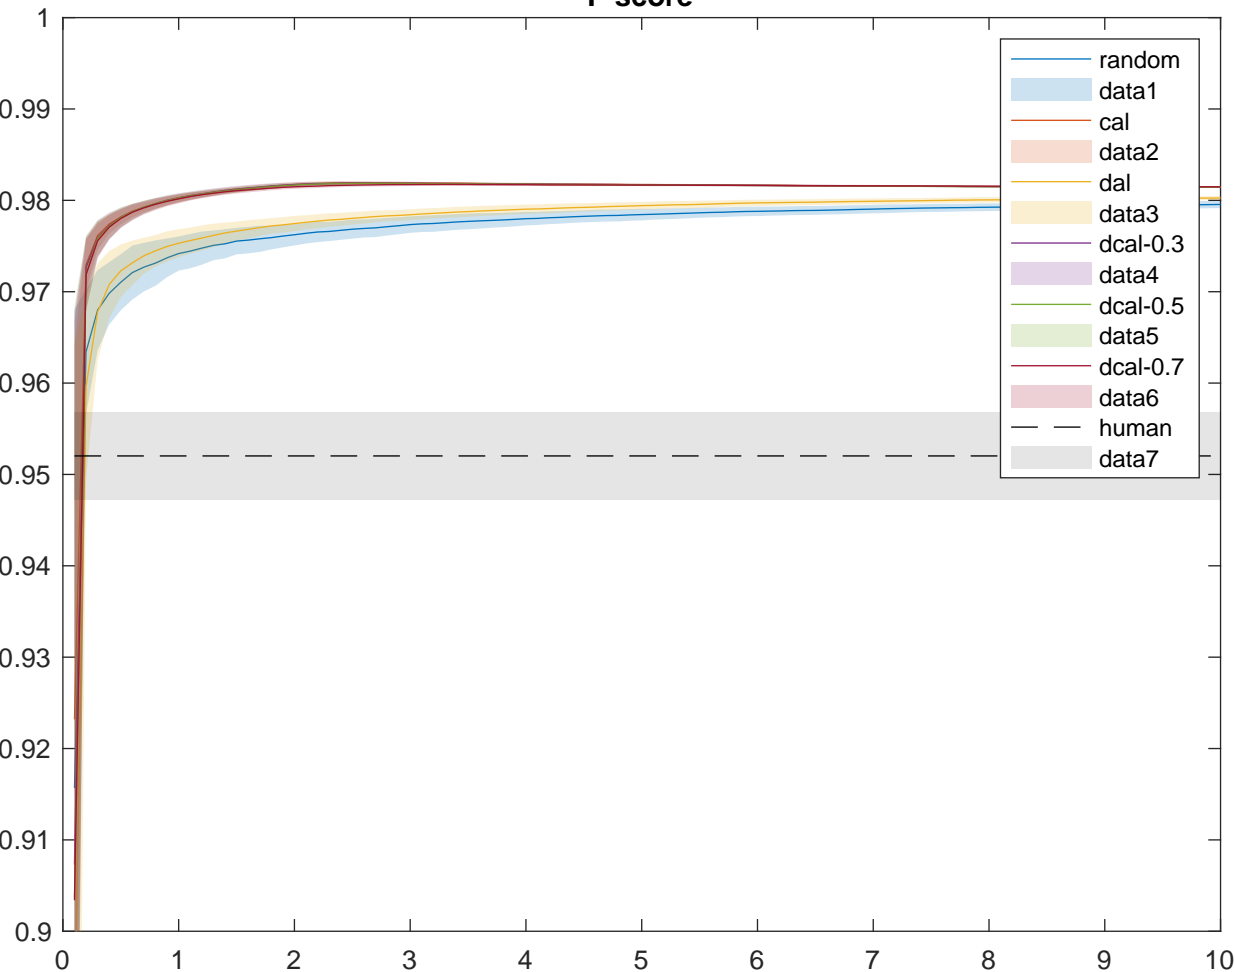

Supplement: Supplementary file 49 [file 90080022263cddafddd4a0726f1fb186-Supplemental-Conference.zip]

Precision

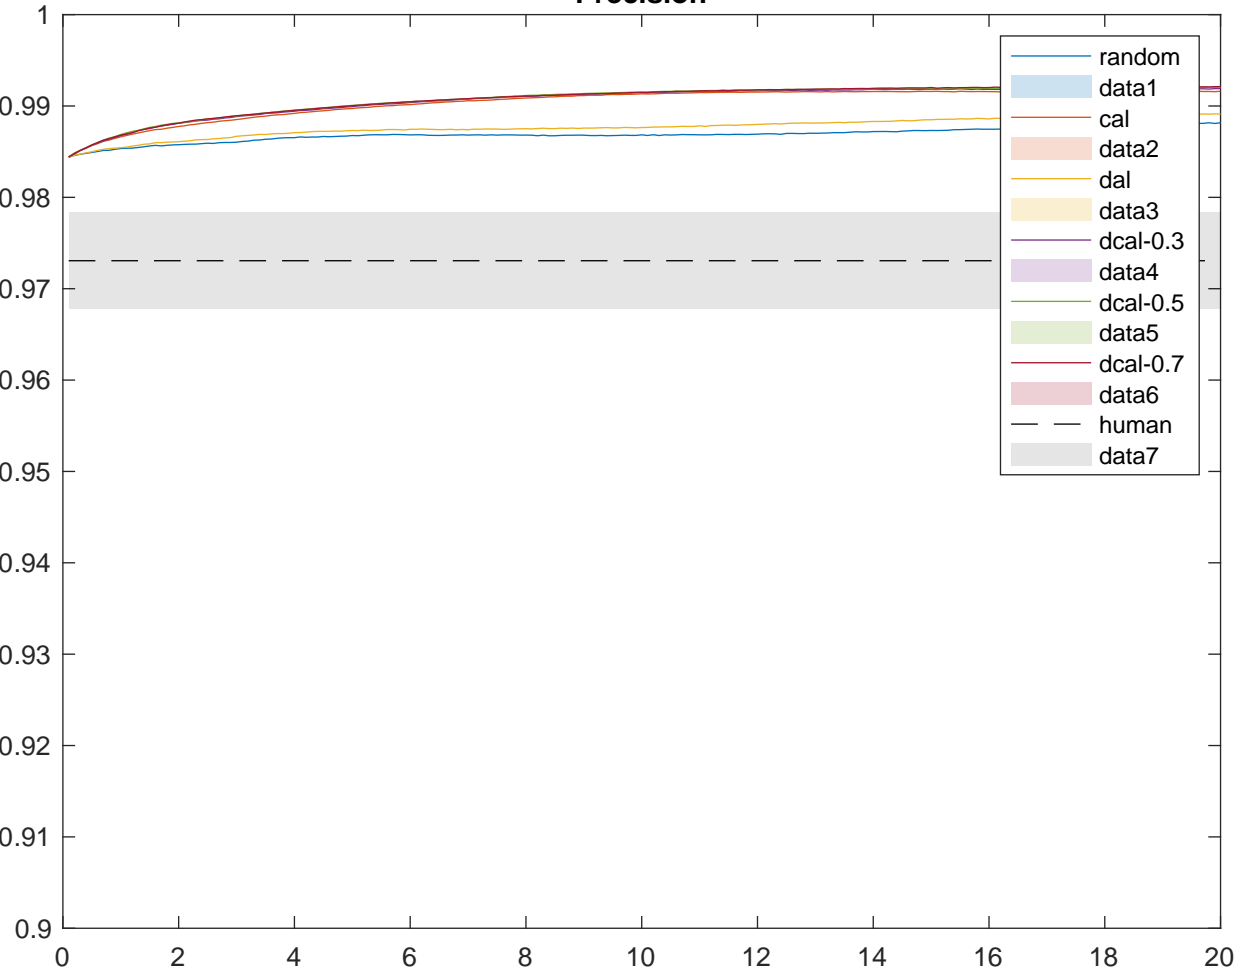

Supplement: Supplementary file 50 [file 90080022263cddafddd4a0726f1fb186-Supplemental-Conference.zip]

Boundary Cells Analysis by Method

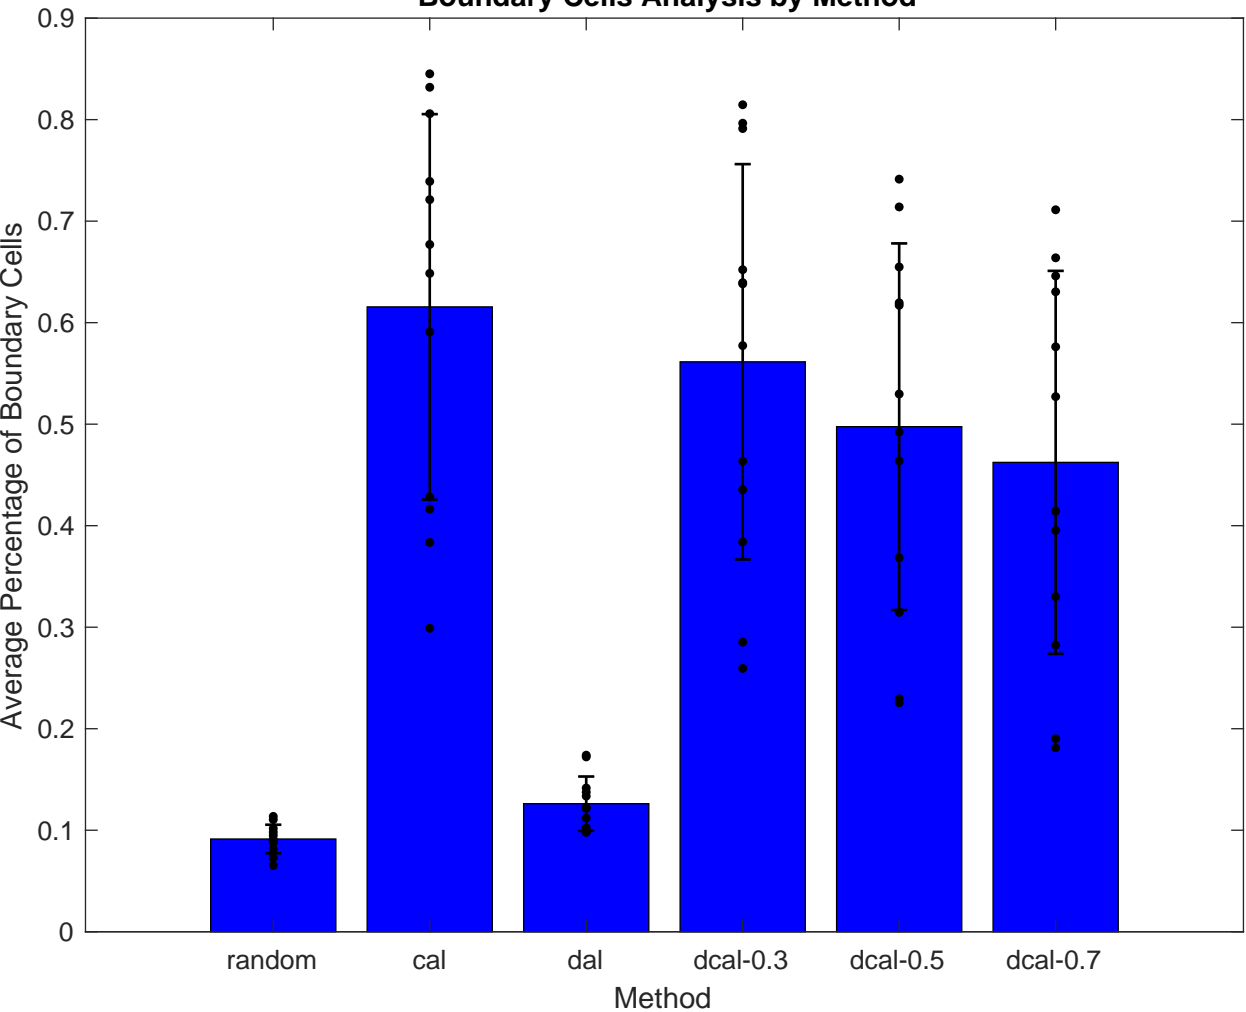

Supplement: Supplementary file 51 [file 90080022263cddafddd4a0726f1fb186-Supplemental-Conference.zip]

Accuracy

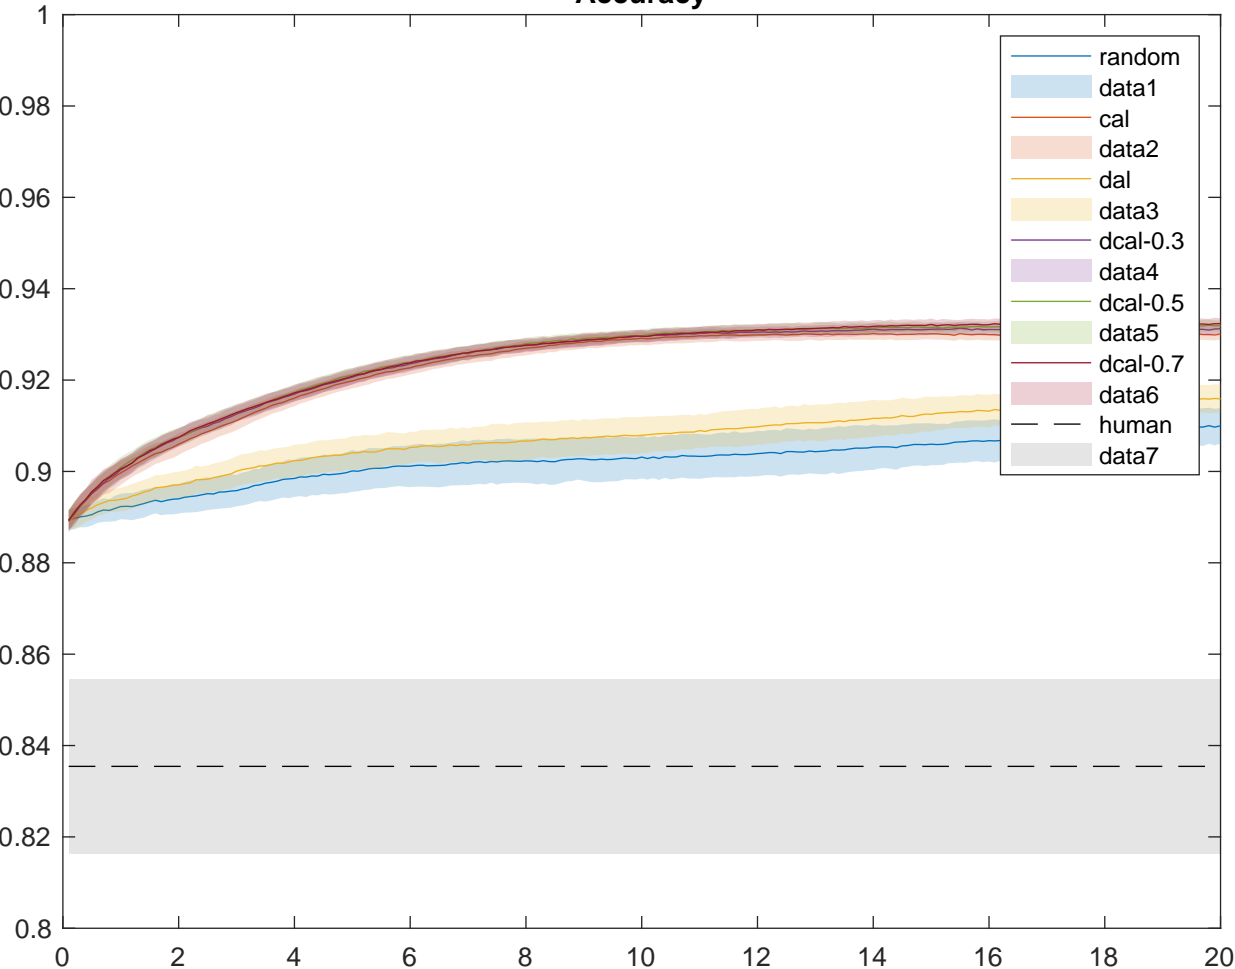

Supplement: Supplementary file 52 [file 90080022263cddafddd4a0726f1fb186-Supplemental-Conference.zip]

True Negative Rate

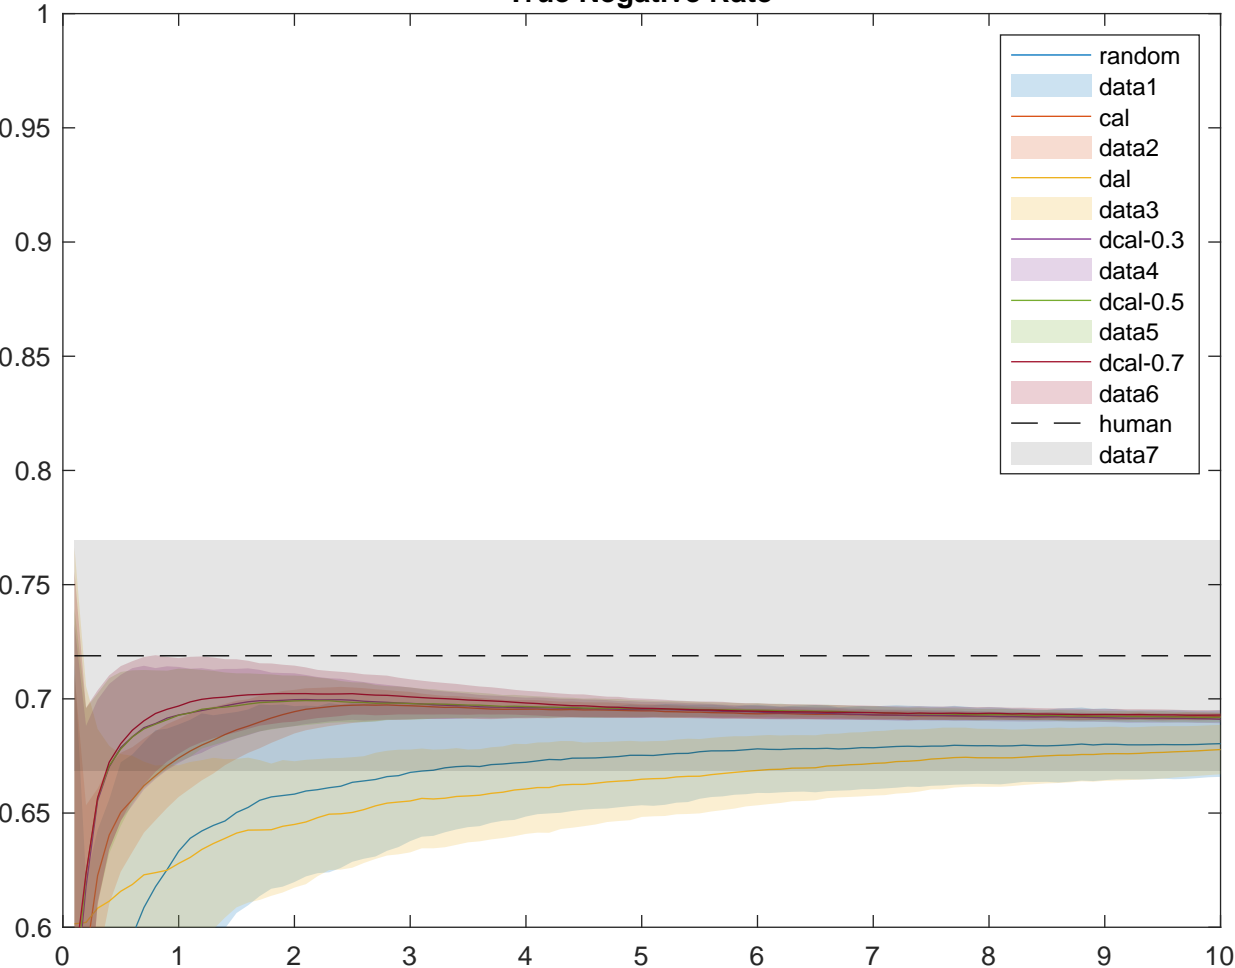

Supplement: Supplementary file 53 [file 90080022263cddafddd4a0726f1fb186-Supplemental-Conference.zip]

## Accuracy-10

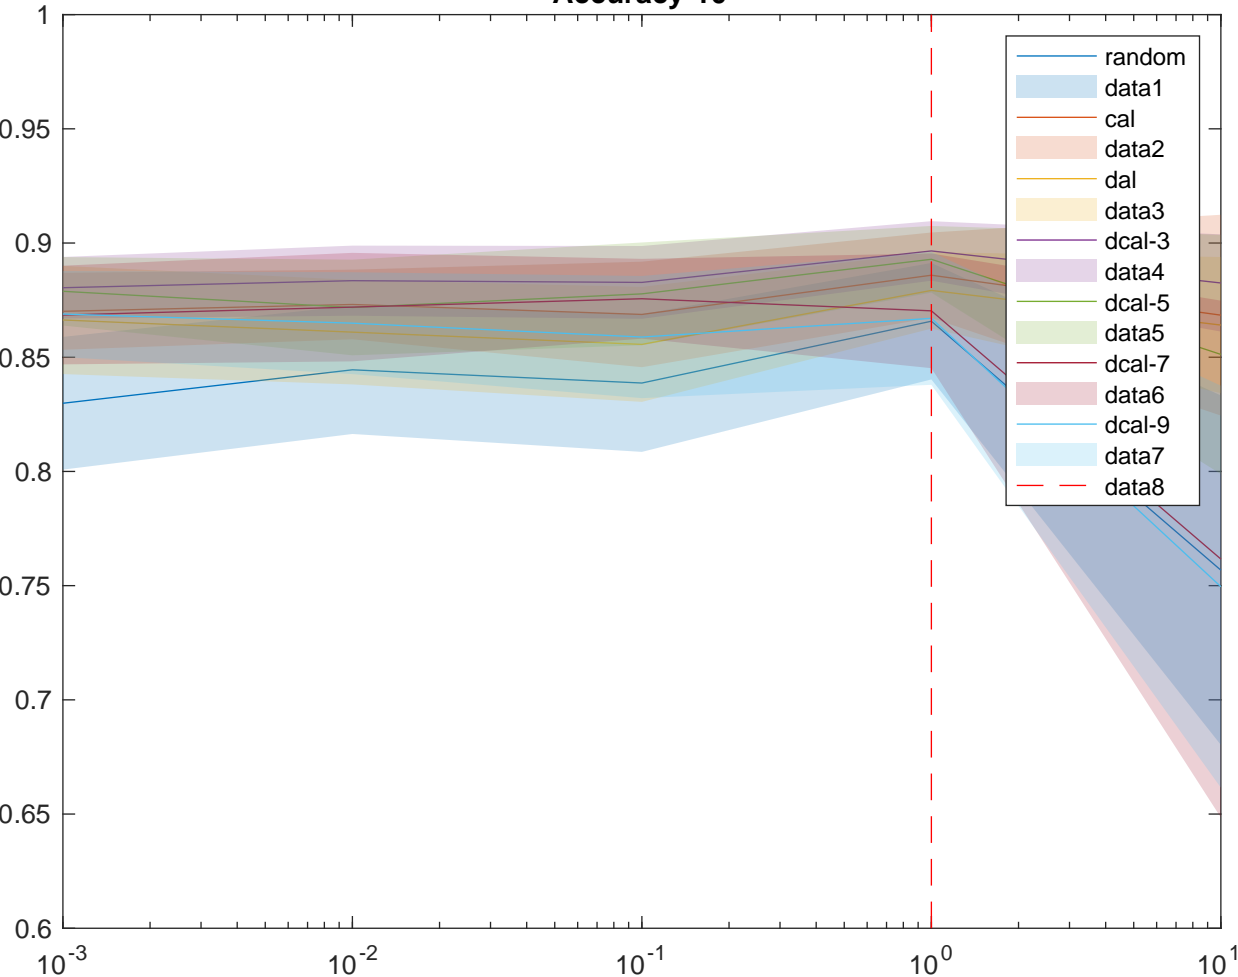

Supplement: Supplementary file 54 [file 90080022263cddafddd4a0726f1fb186-Supplemental-Conference.zip]

## AUC-10

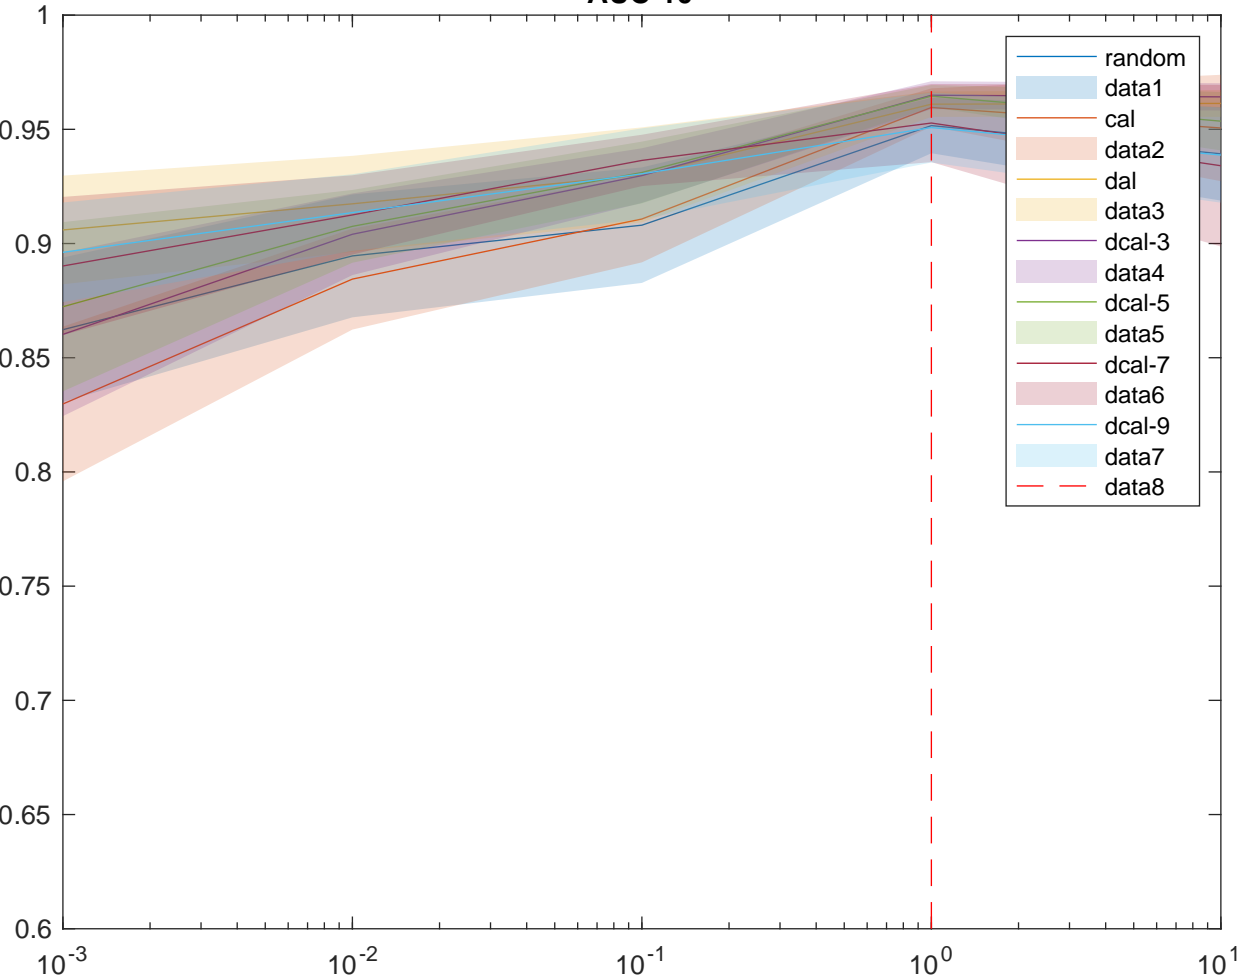

Supplement: Supplementary file 55 [file 90080022263cddafddd4a0726f1fb186-Supplemental-Conference.zip]

## AUC-50

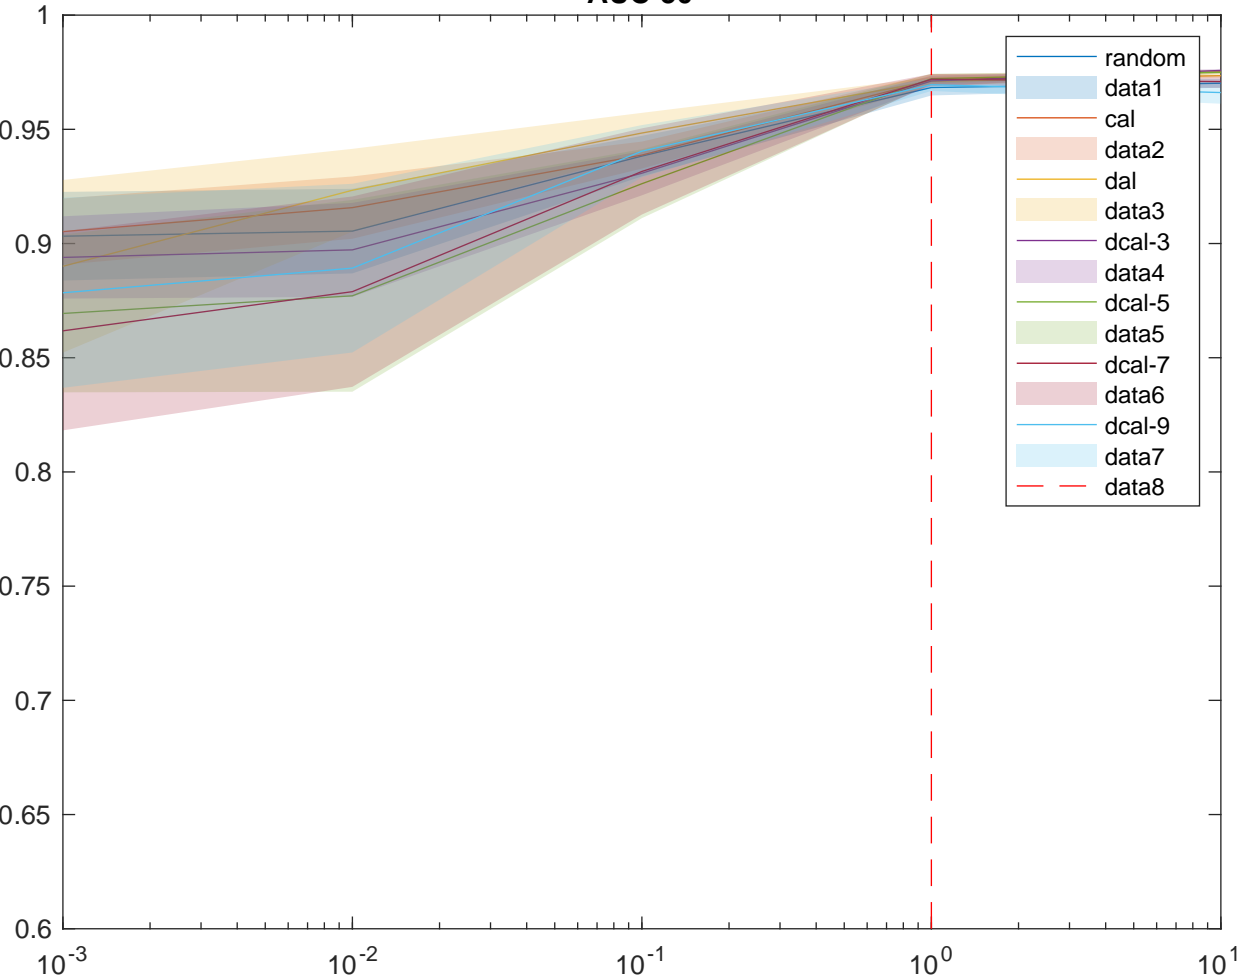

Supplement: Supplementary file 56 [file 90080022263cddafddd4a0726f1fb186-Supplemental-Conference.zip]

Accuracy-50

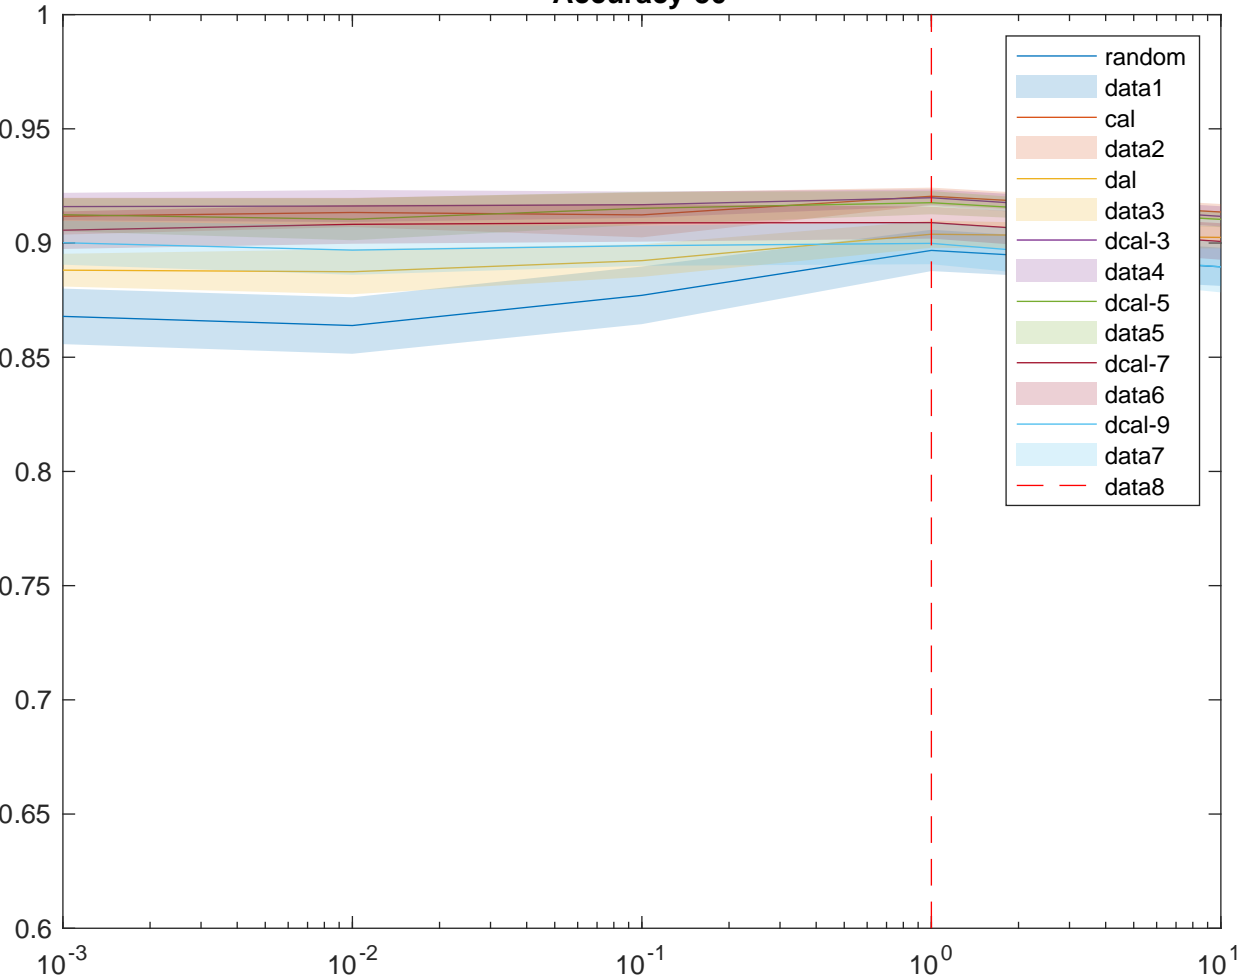

Supplement: Supplementary file 58 [file 90080022263cddafddd4a0726f1fb186-Supplemental-Conference.zip]

True Negative Rate

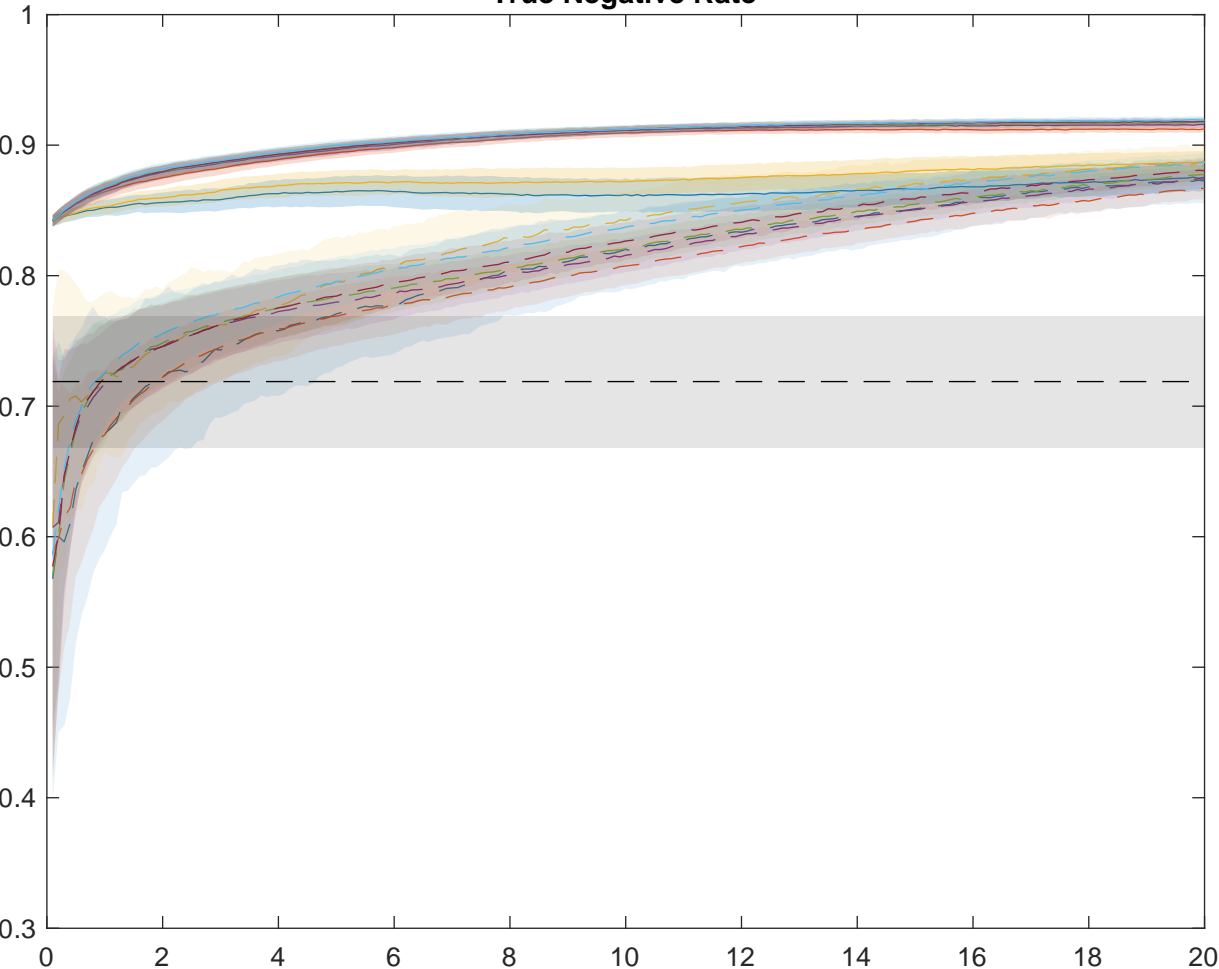

Supplement: Supplementary file 60 [file 90080022263cddafddd4a0726f1fb186-Supplemental-Conference.zip]

**F-score**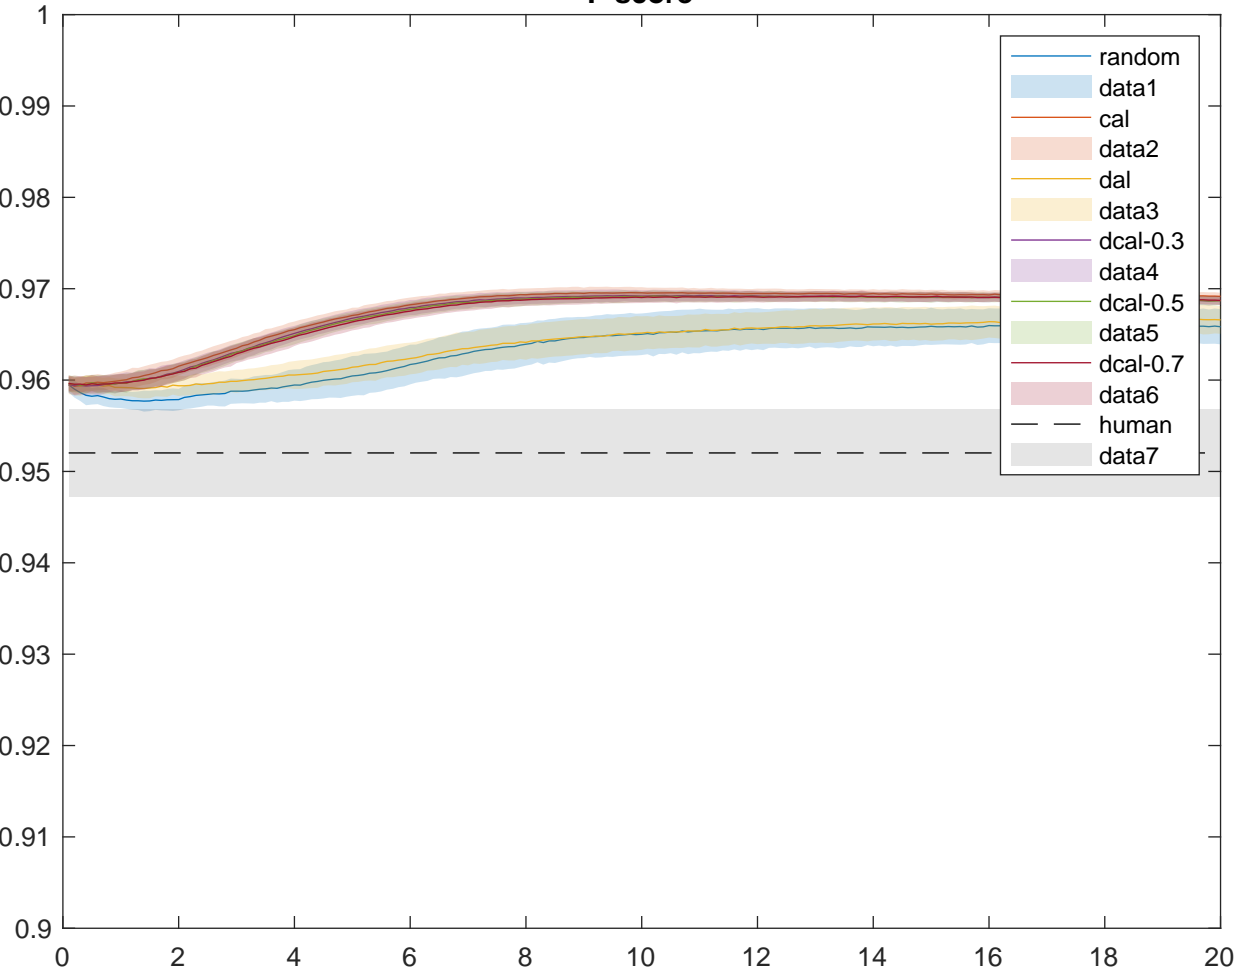

Supplement: Supplementary file 61 [file 90080022263cddafddd4a0726f1fb186-Supplemental-Conference.zip]

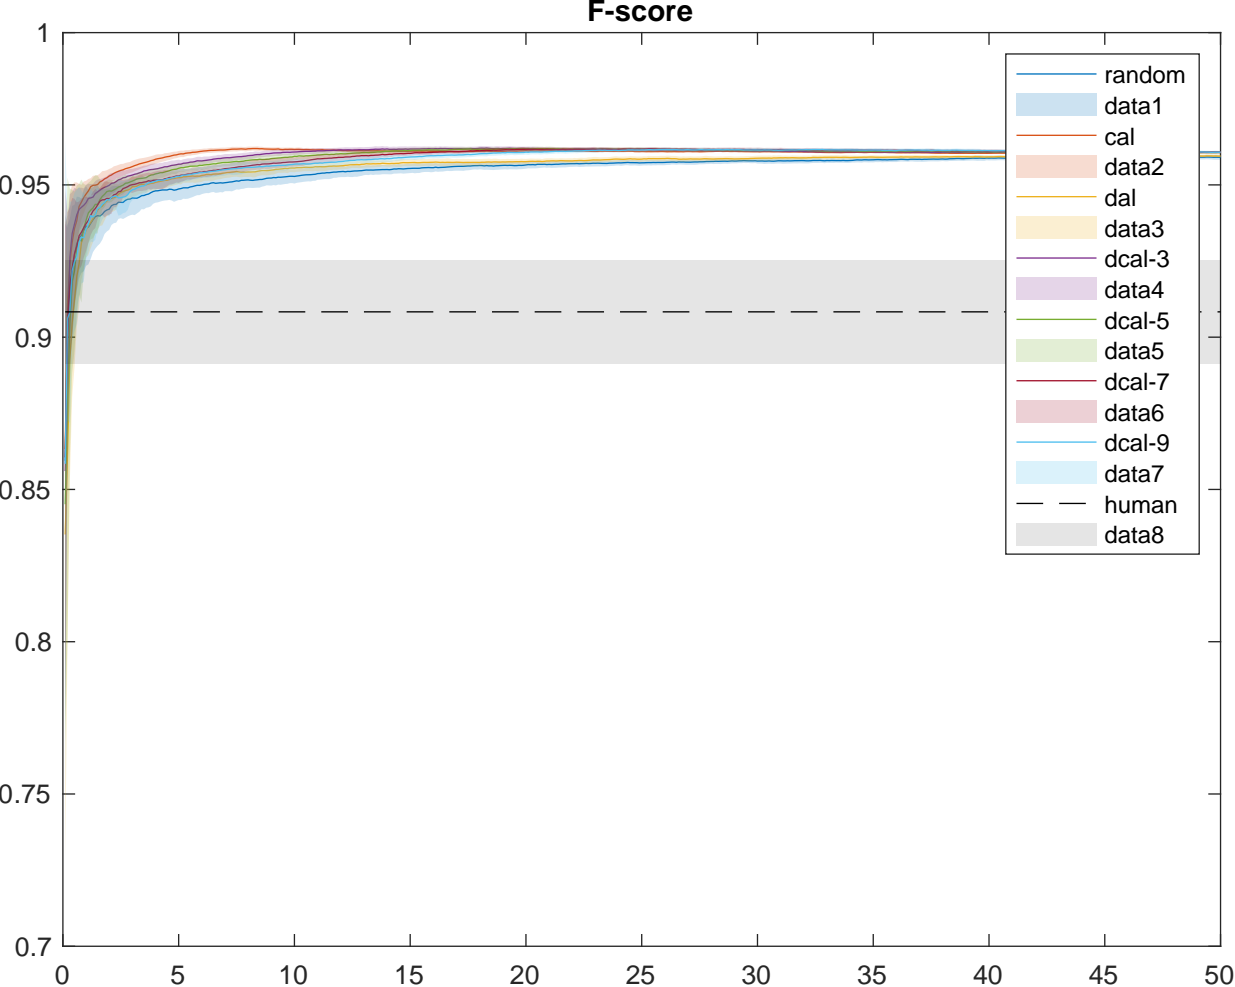

Supplement: Supplementary file 63 [file 90080022263cddafddd4a0726f1fb186-Supplemental-Conference.zip]

AUC

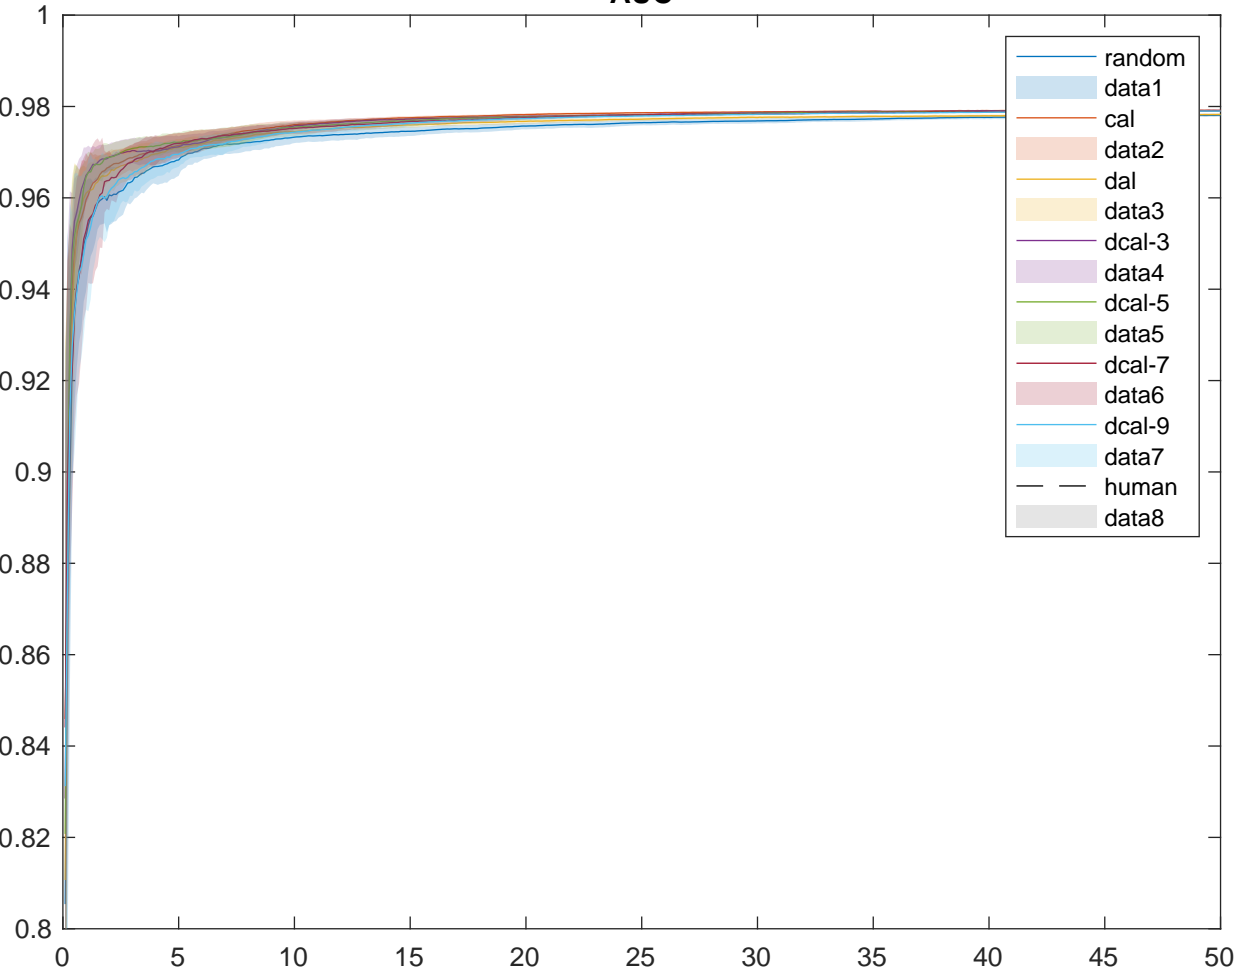

Supplement: Supplementary file 64 [file 90080022263cddafddd4a0726f1fb186-Supplemental-Conference.zip]

True Positive Rate-200

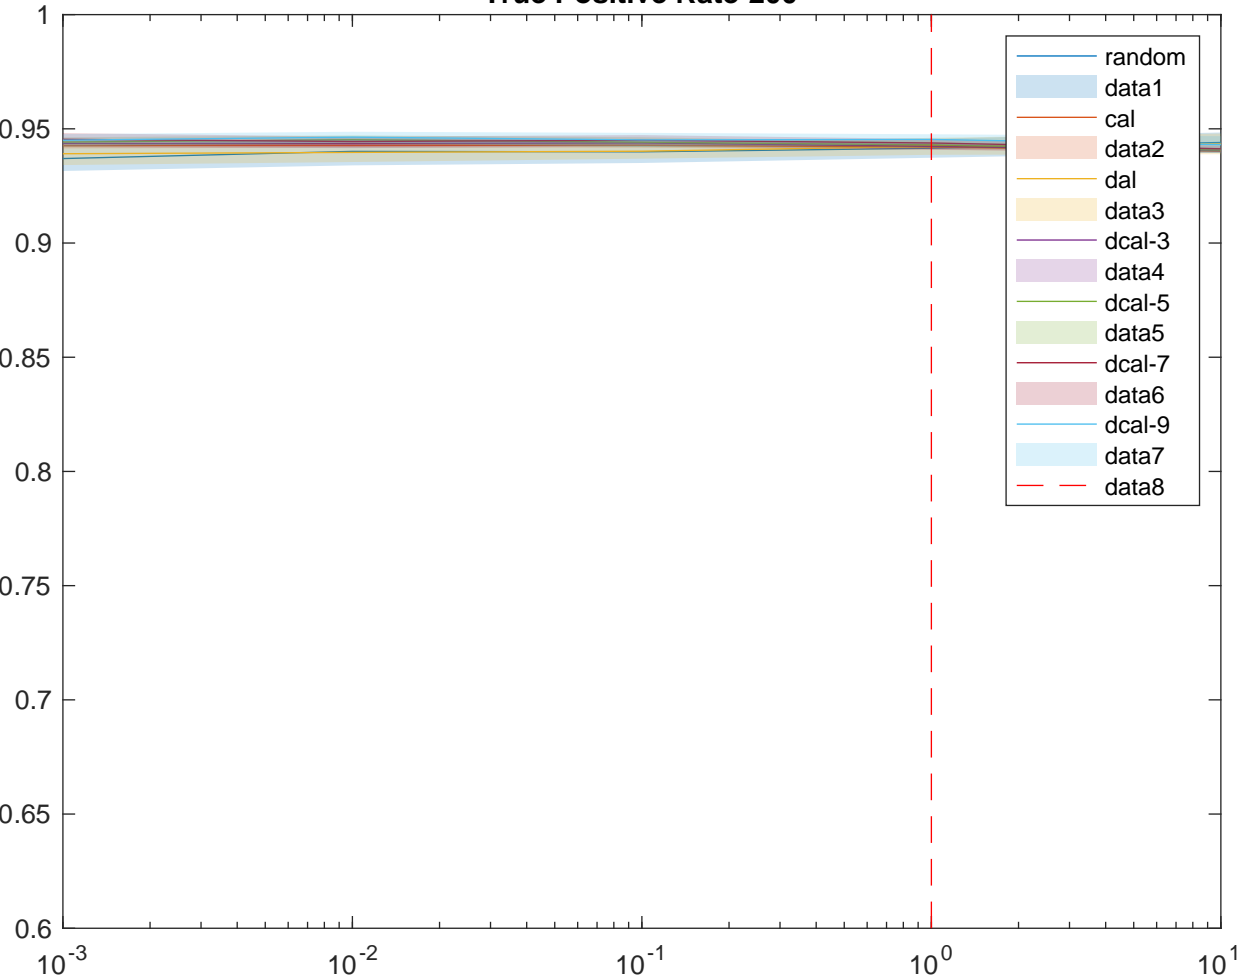

Supplement: Supplementary file 65 [file 90080022263cddafddd4a0726f1fb186-Supplemental-Conference.zip]
